# Supplementary material for: EUPollMap: the European atlas of contemporary pollen distribution maps derived from an integrated Kriging interpolation approach
Source: Copernicus journal article supplement (doi:10.5194/essd-16-731-2024), 2024-01-31

Oriani et al., EUPollMap: The European atlas of contemporary pollen distribution maps derived from an integrated Kriging interpolation approach – **Supplemental material 3: Preliminary comparison between maps generated using Ordinary Kriging (OK) and Universal Kriging with external drift (UK). Elevation is used as external drift.**

a) Ordinary Kriging - Abies - Occurrence probability (Kriging mean)

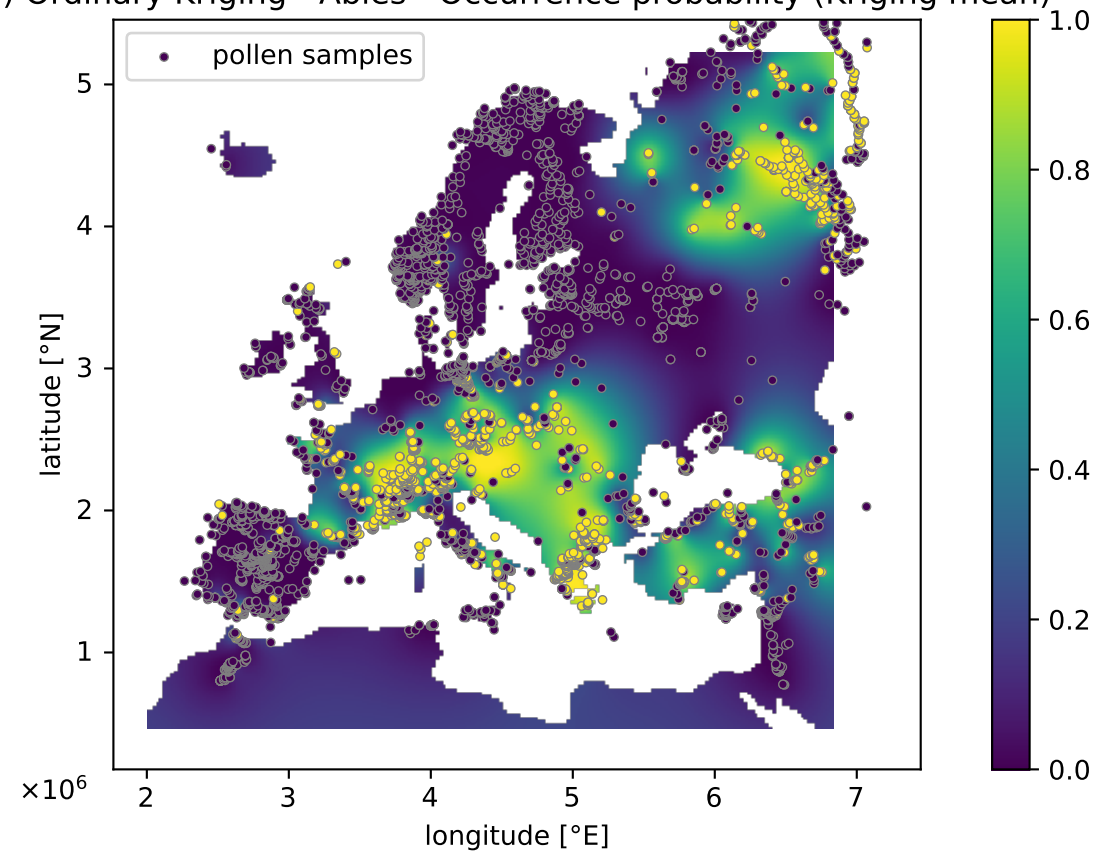

b) Abies - Semivariogram

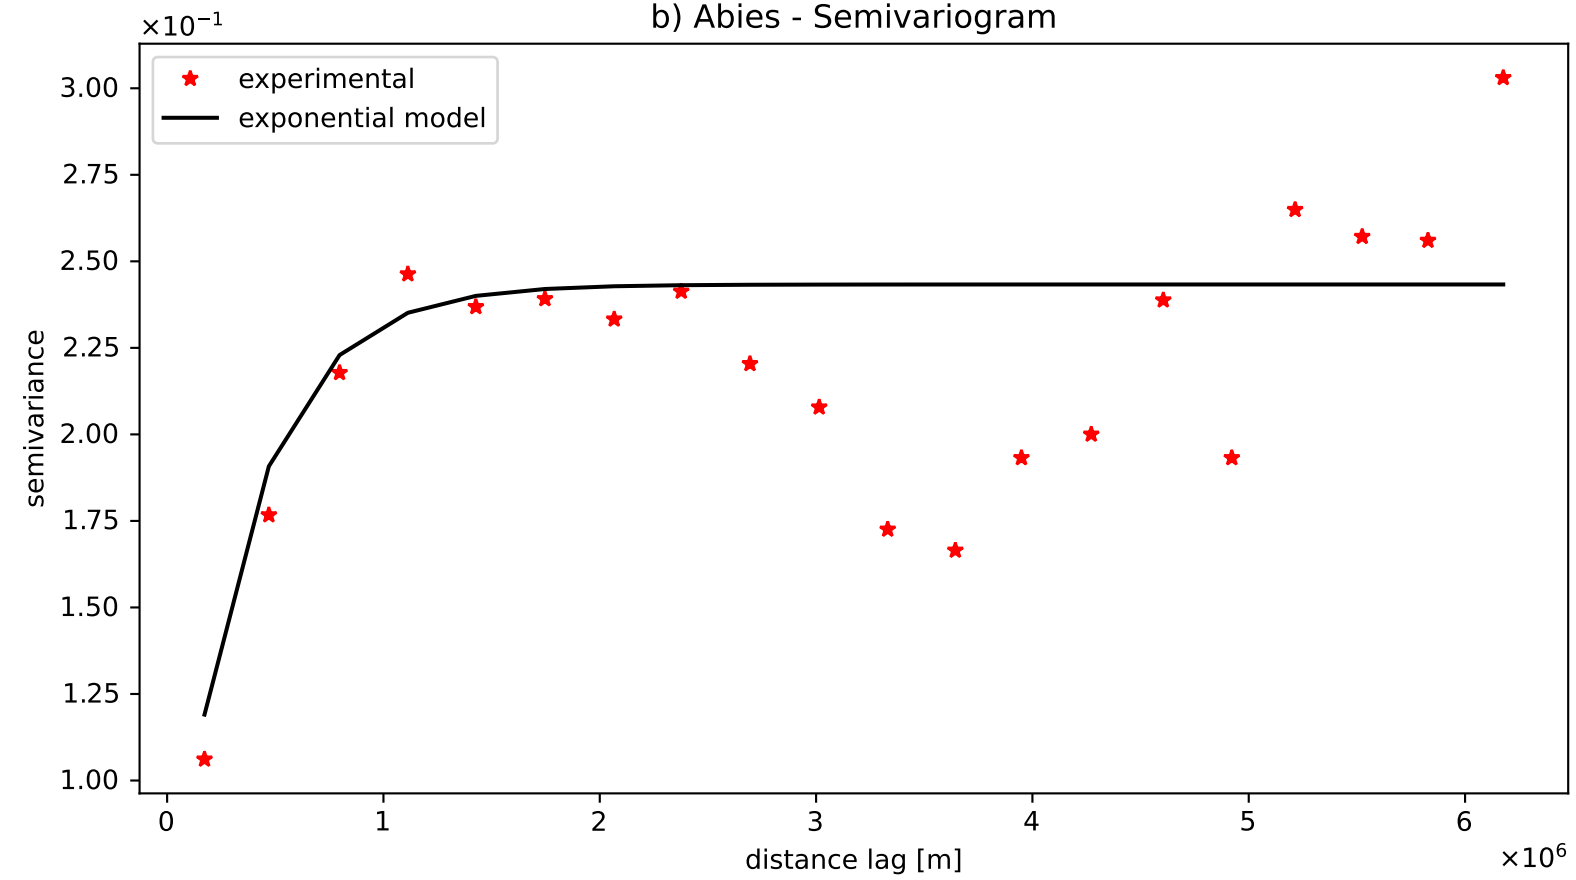

c) Abies - Occurrence map (probability thresholds)

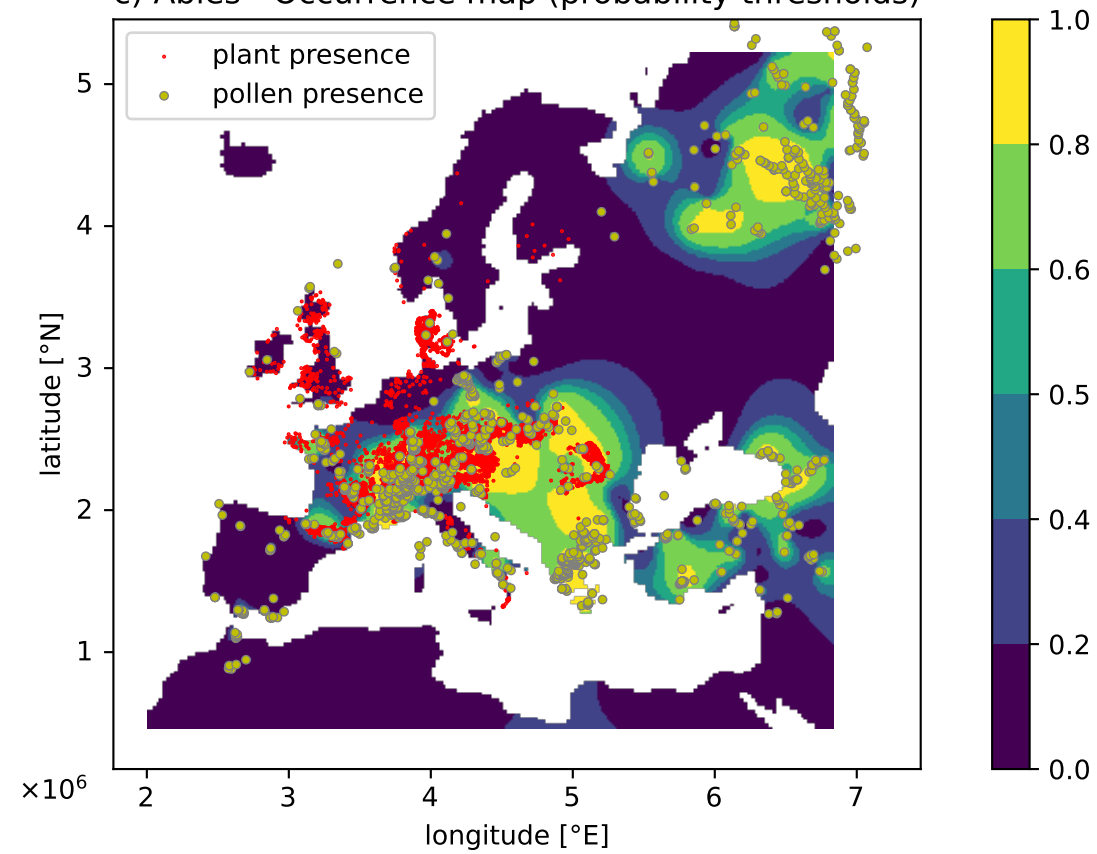

d) Abies - Occurrence uncertainty (Kriging variance)

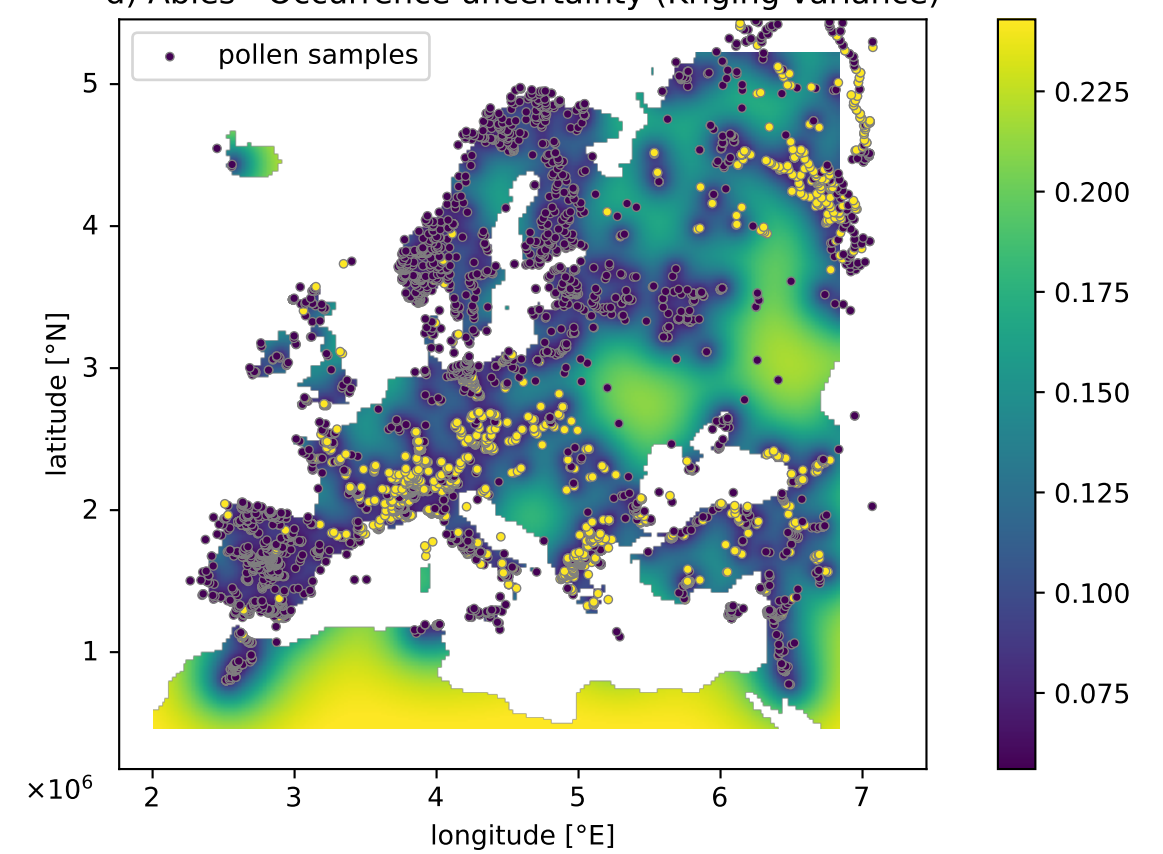

a) Universal Kriging - Abies - Occurrence probability (Kriging mean)

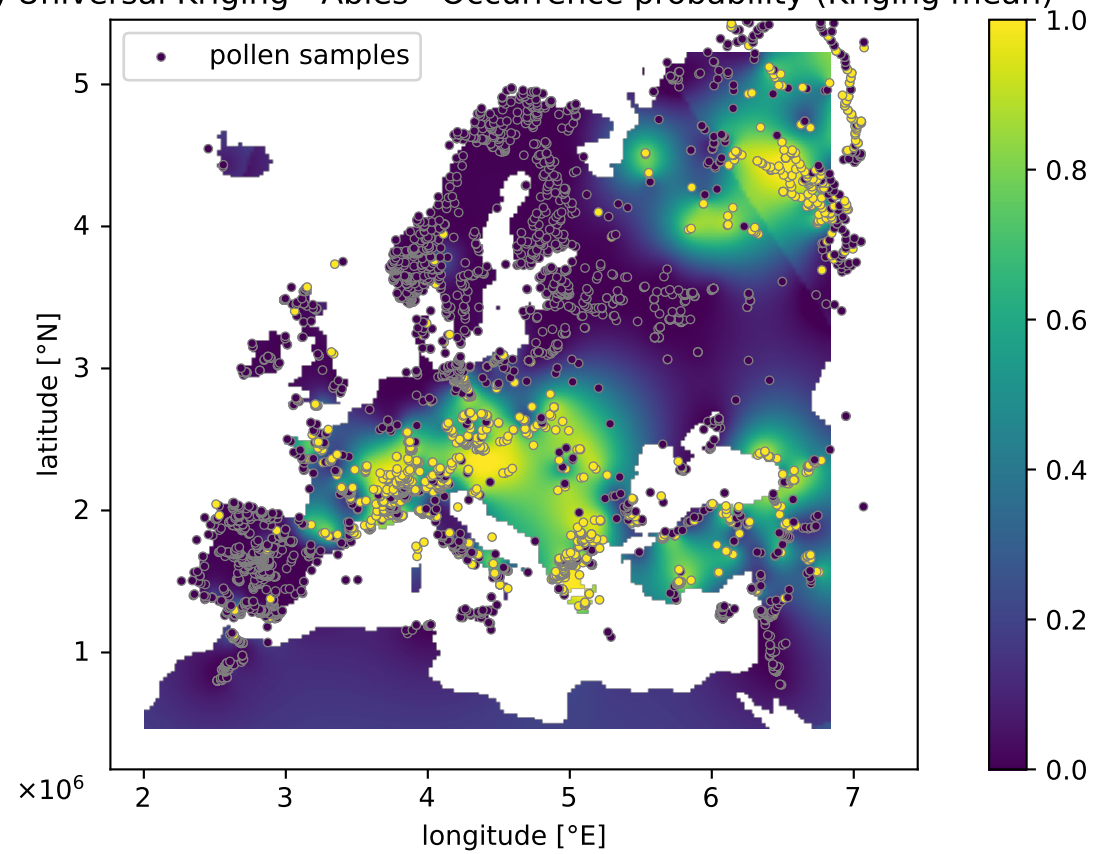

b) Abies - Semivariogram

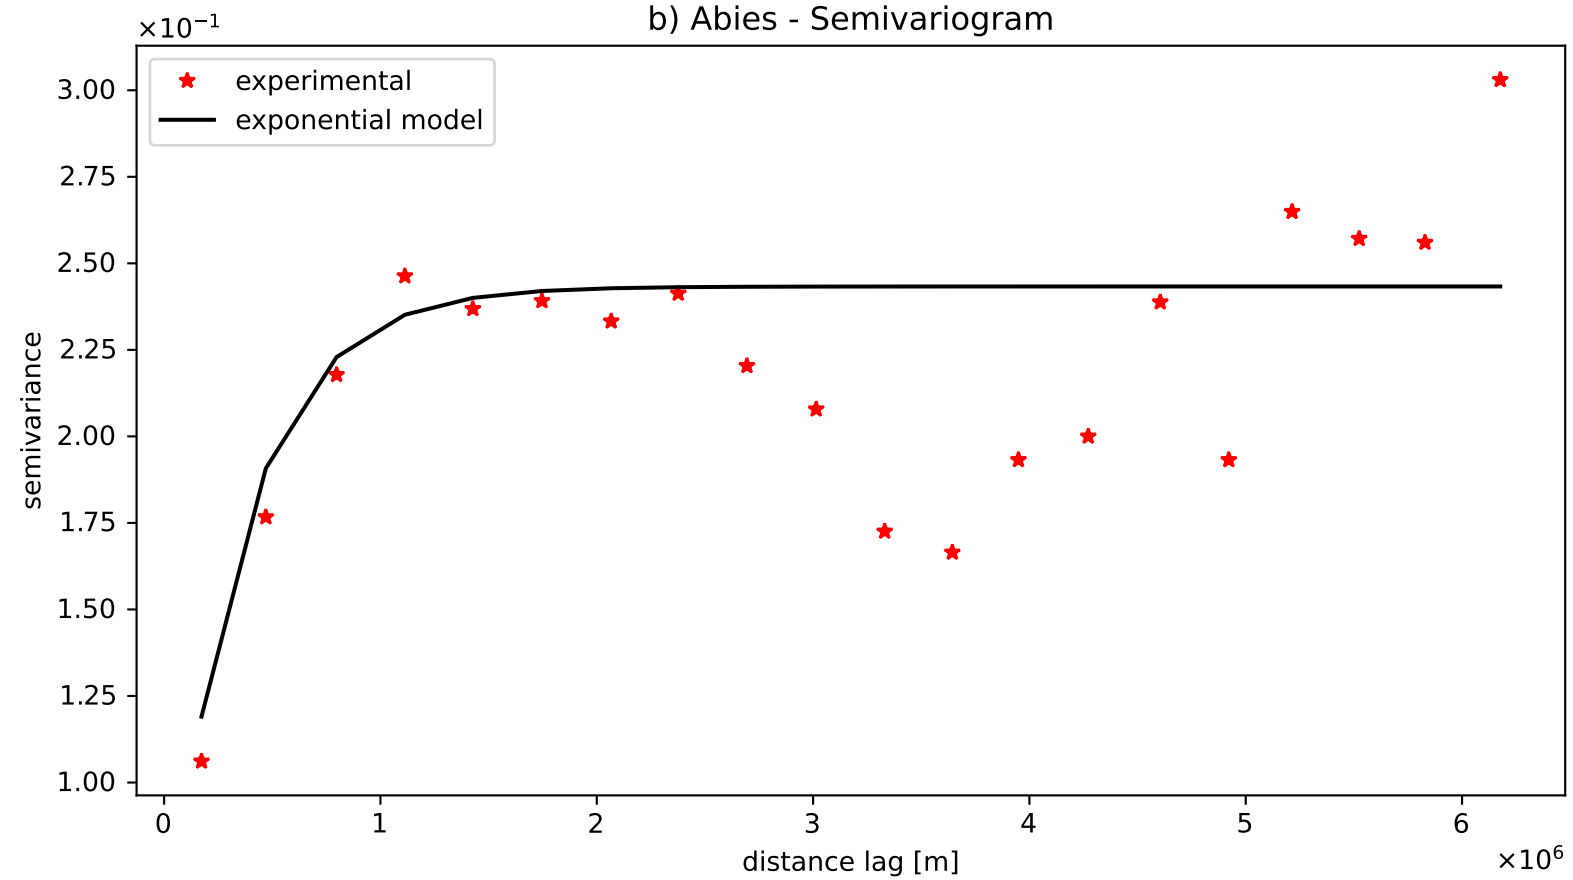

c) Abies - Occurrence map (probability thresholds)

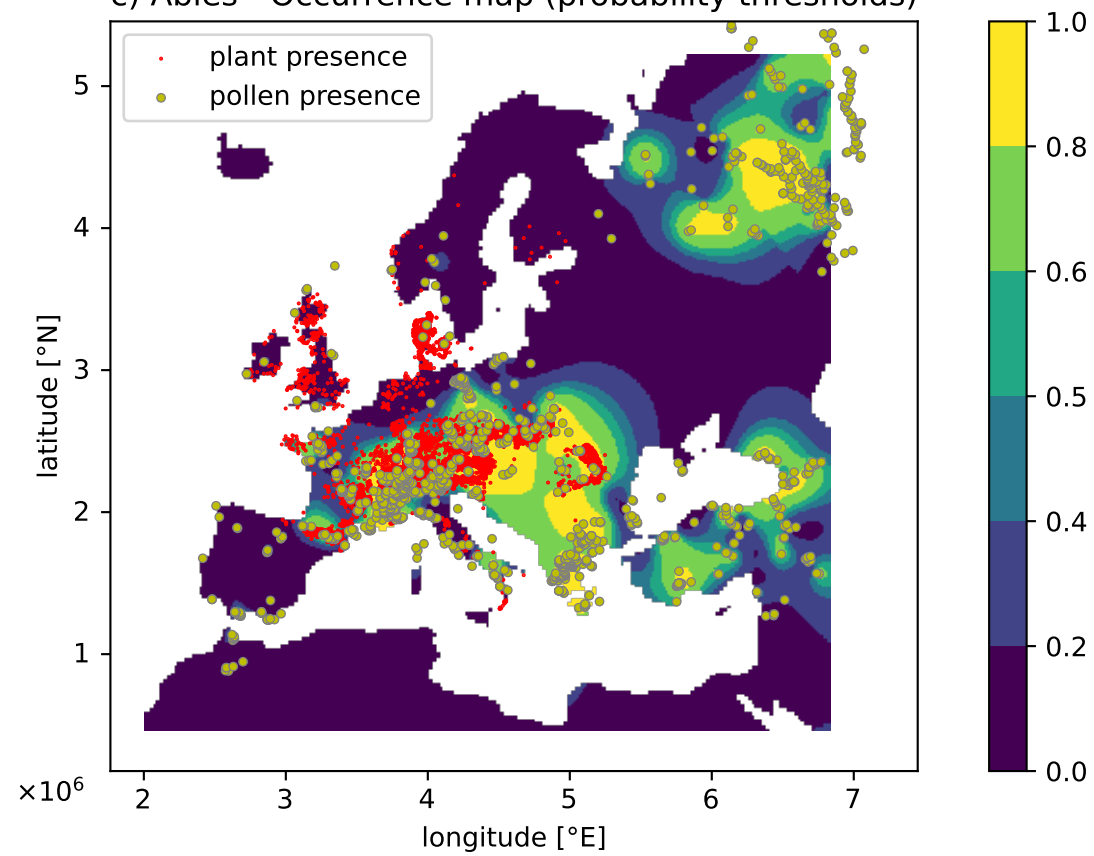

d) Abies - Occurrence uncertainty (Kriging variance)

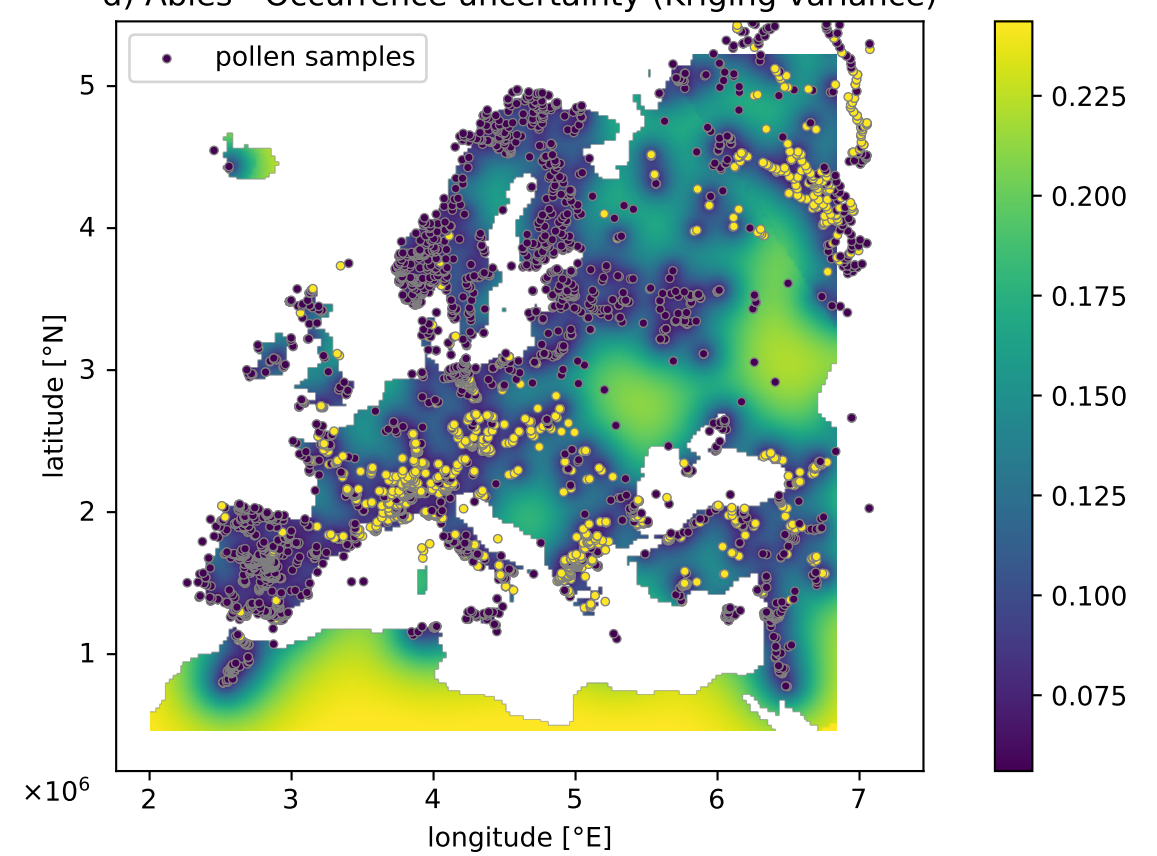

a) Ordinary Kriging - Betula - Occurrence probability (Kriging mean)

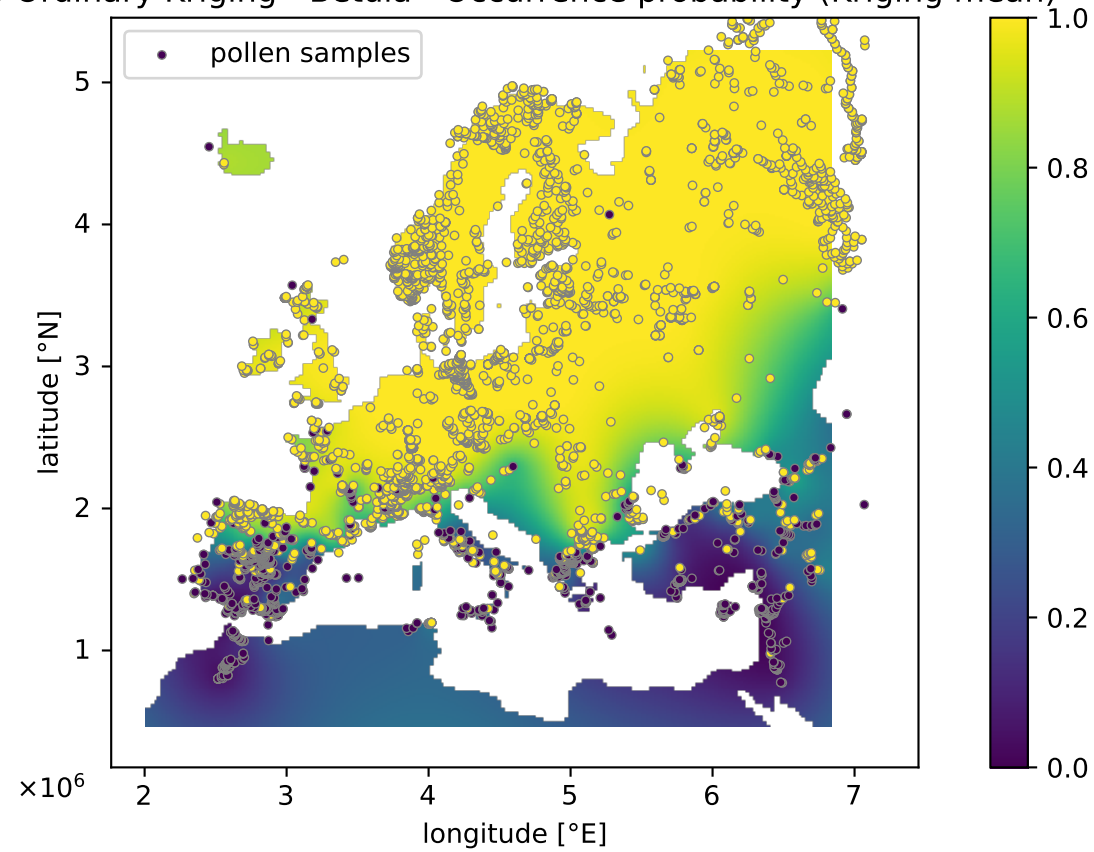

b) Betula - Semivariogram

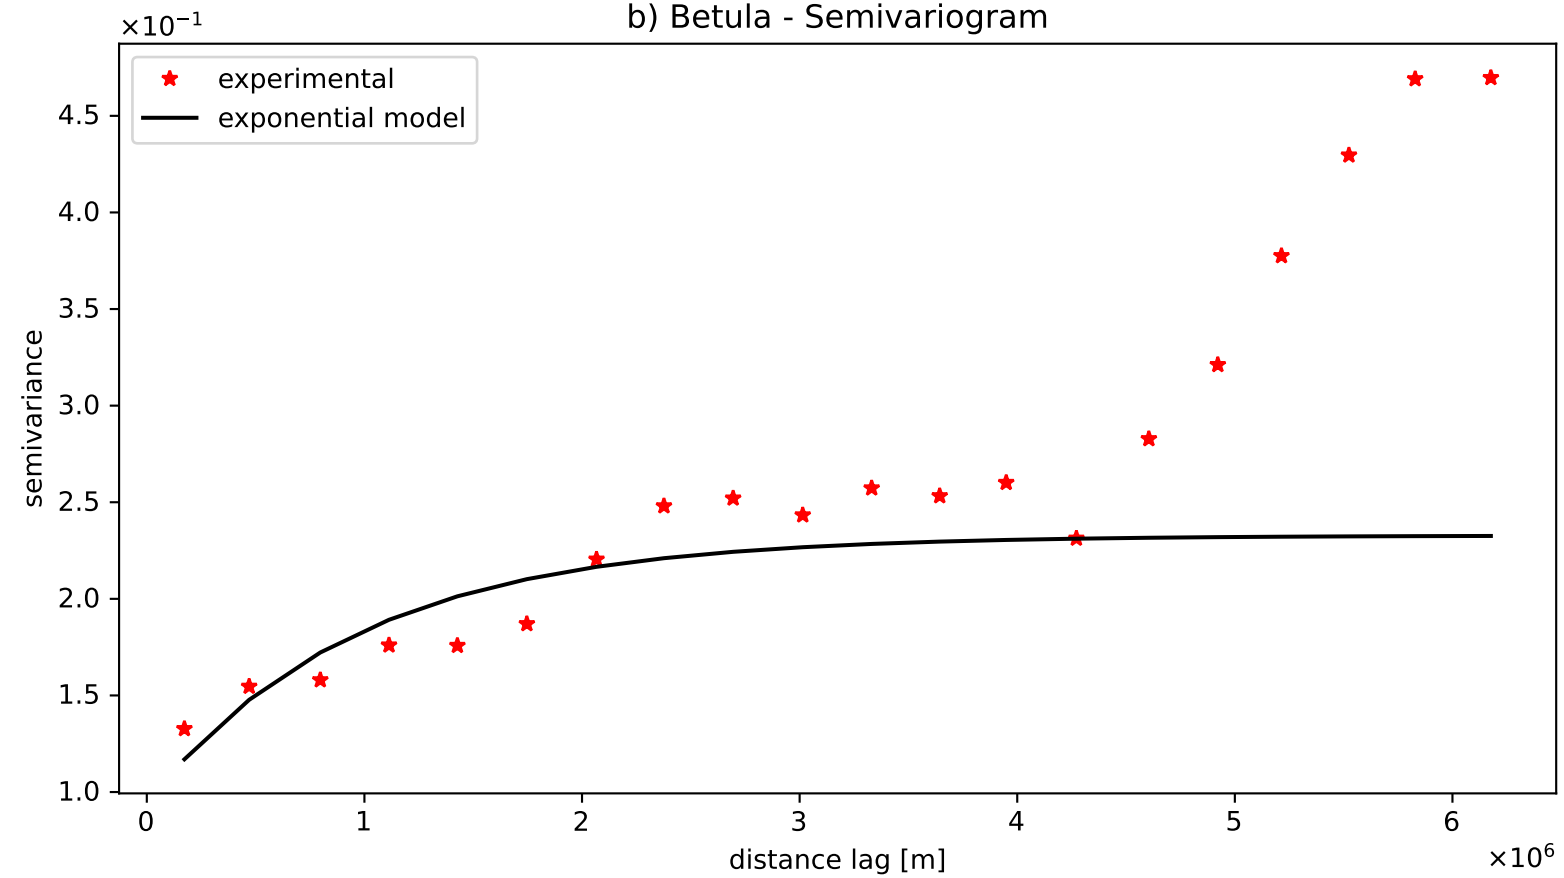

c) Betula - Occurrence map (probability thresholds)

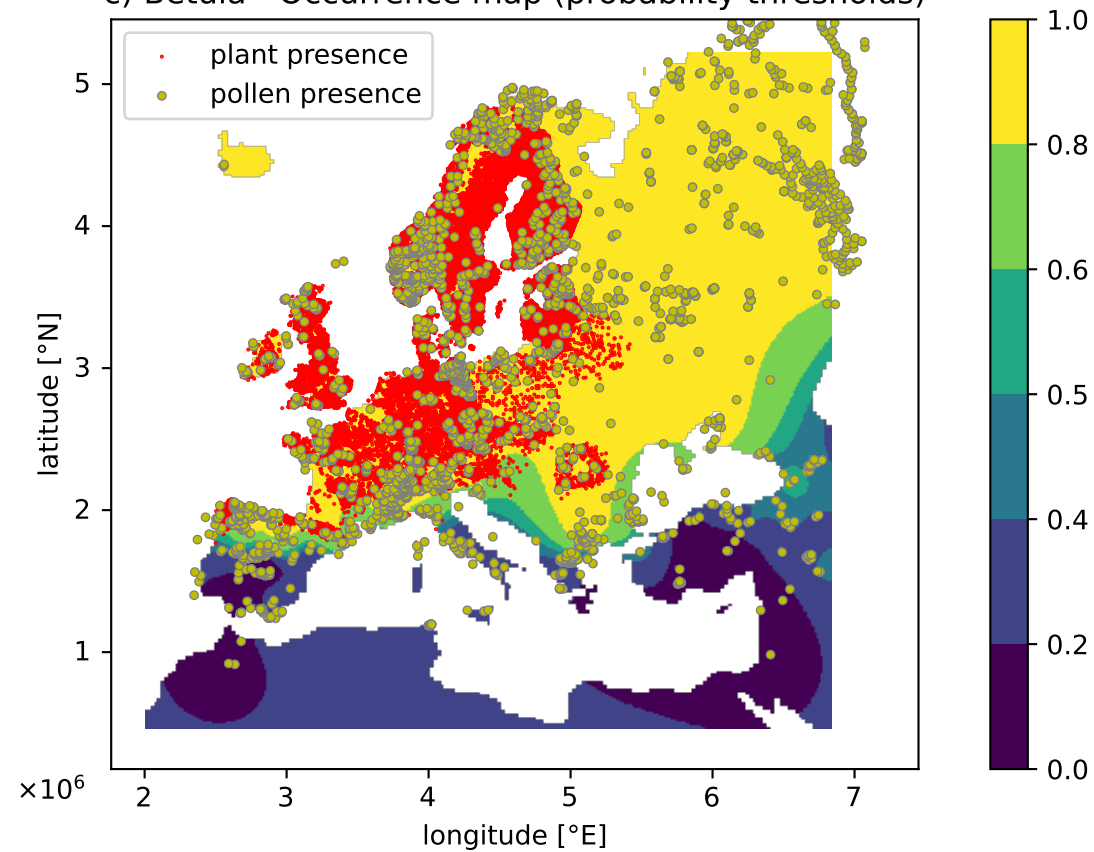

d) Betula - Occurrence uncertainty (Kriging variance)

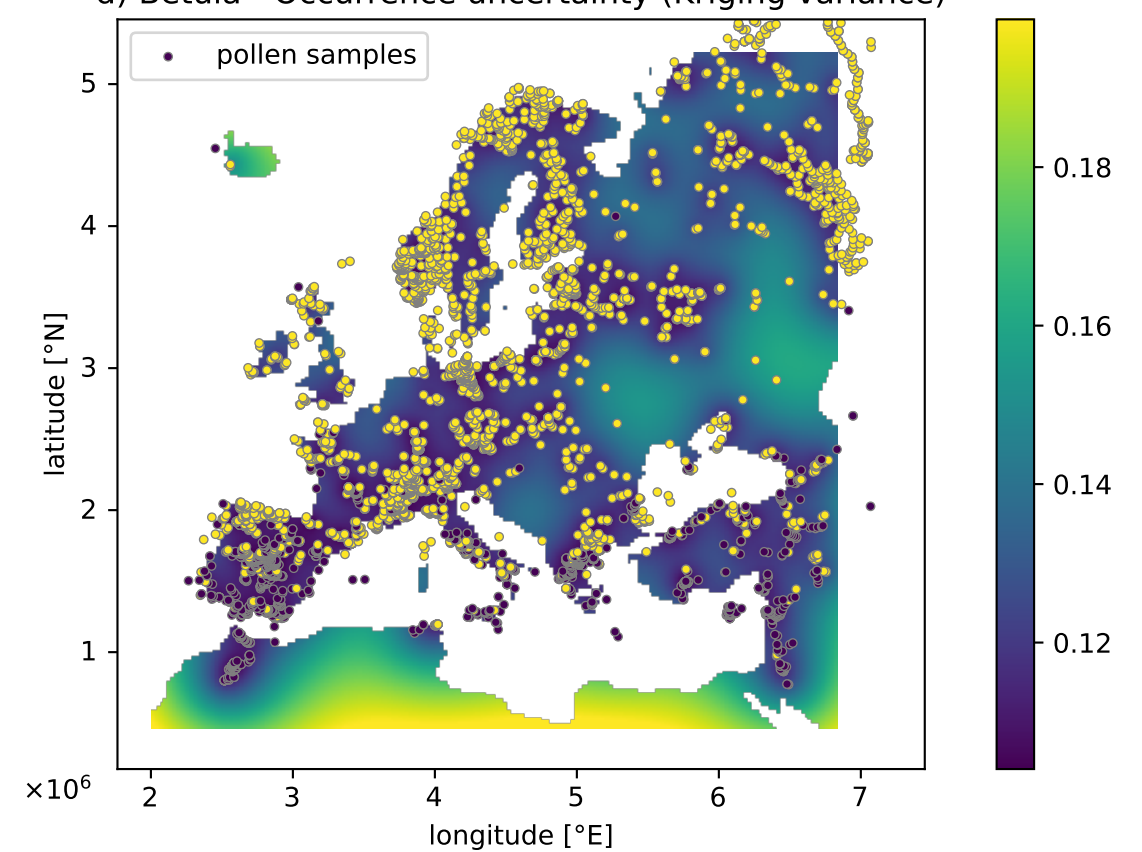



a) Universal Kriging - Betula - Occurrence probability (Kriging mean)

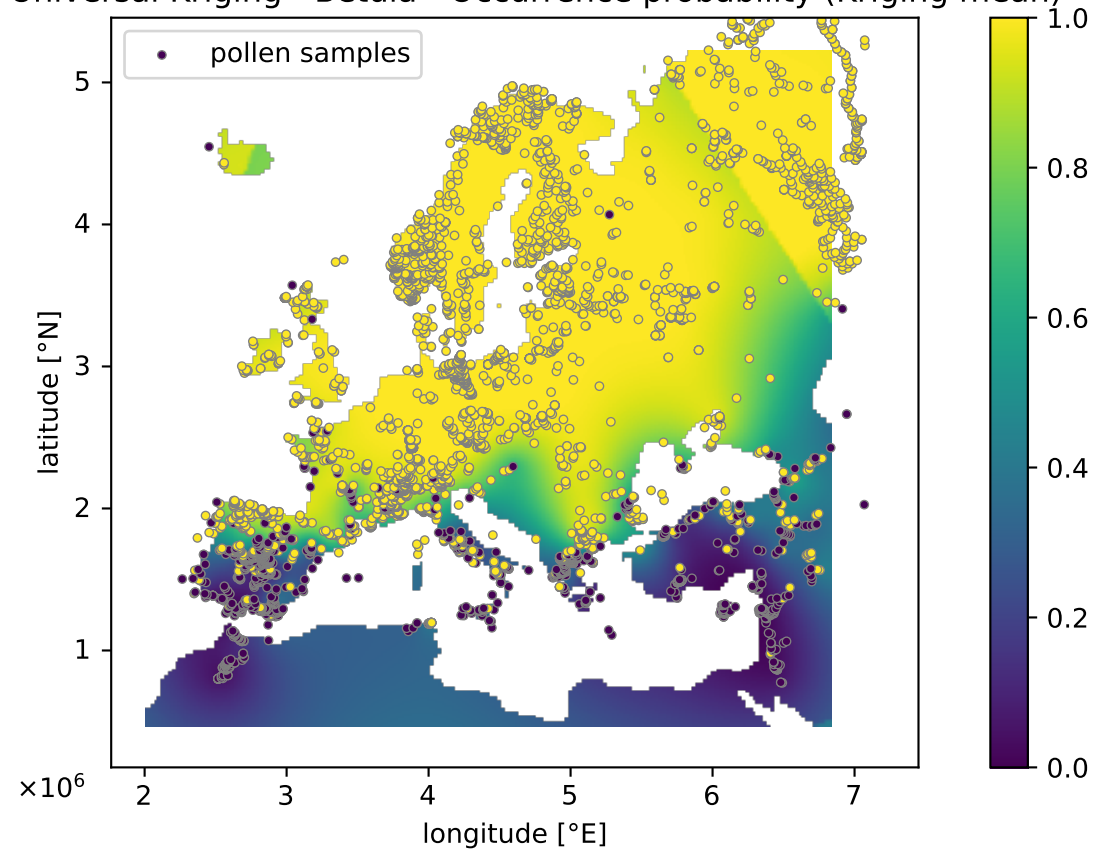

b) Betula - Semivariogram

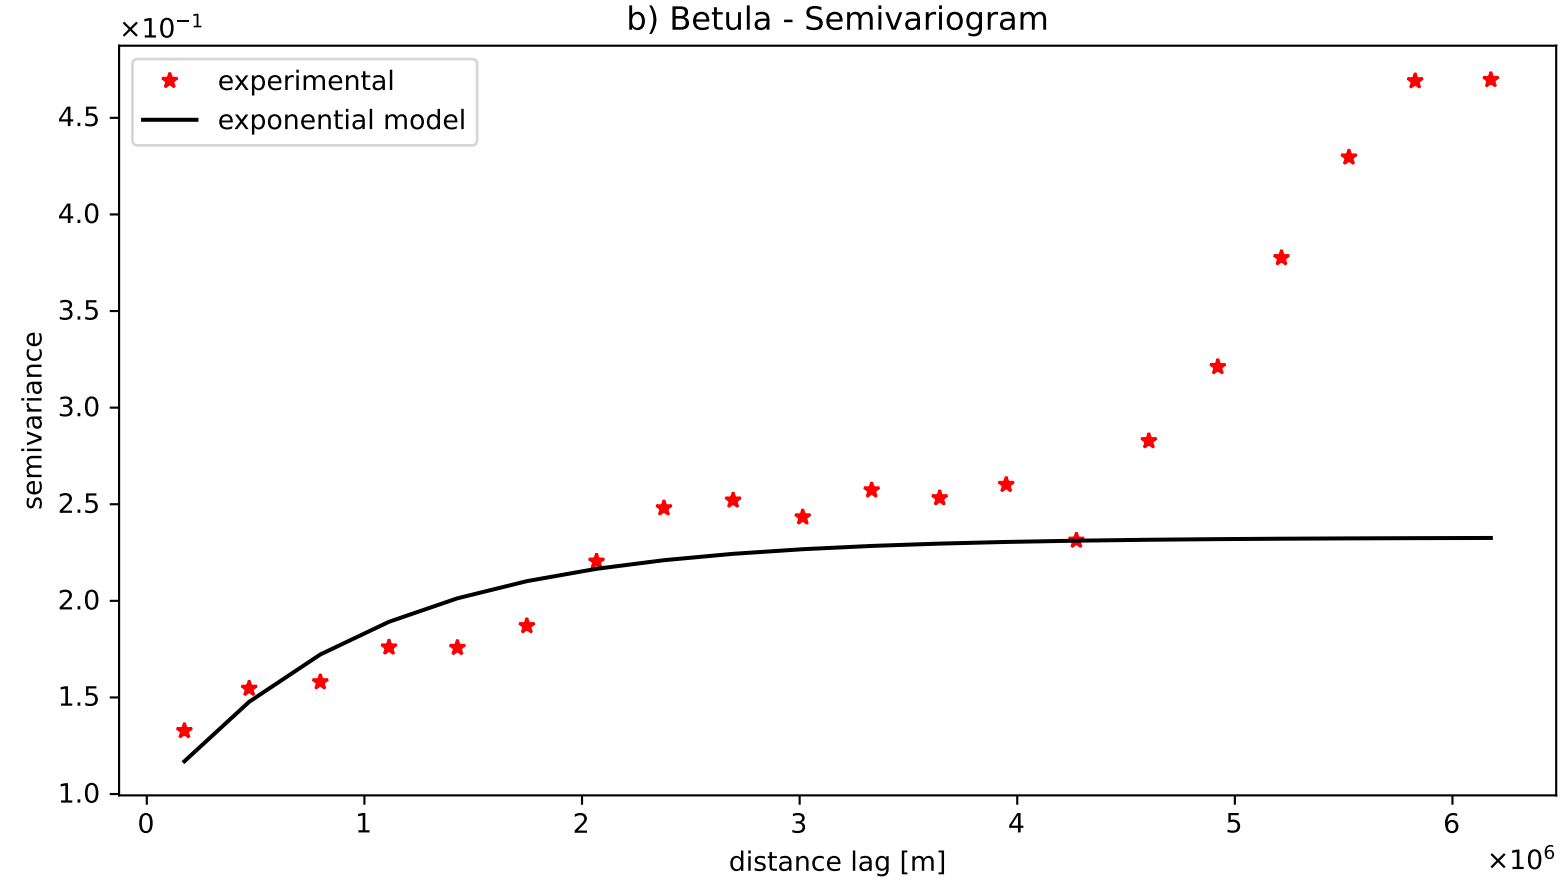

c) Betula - Occurrence map (probability thresholds)

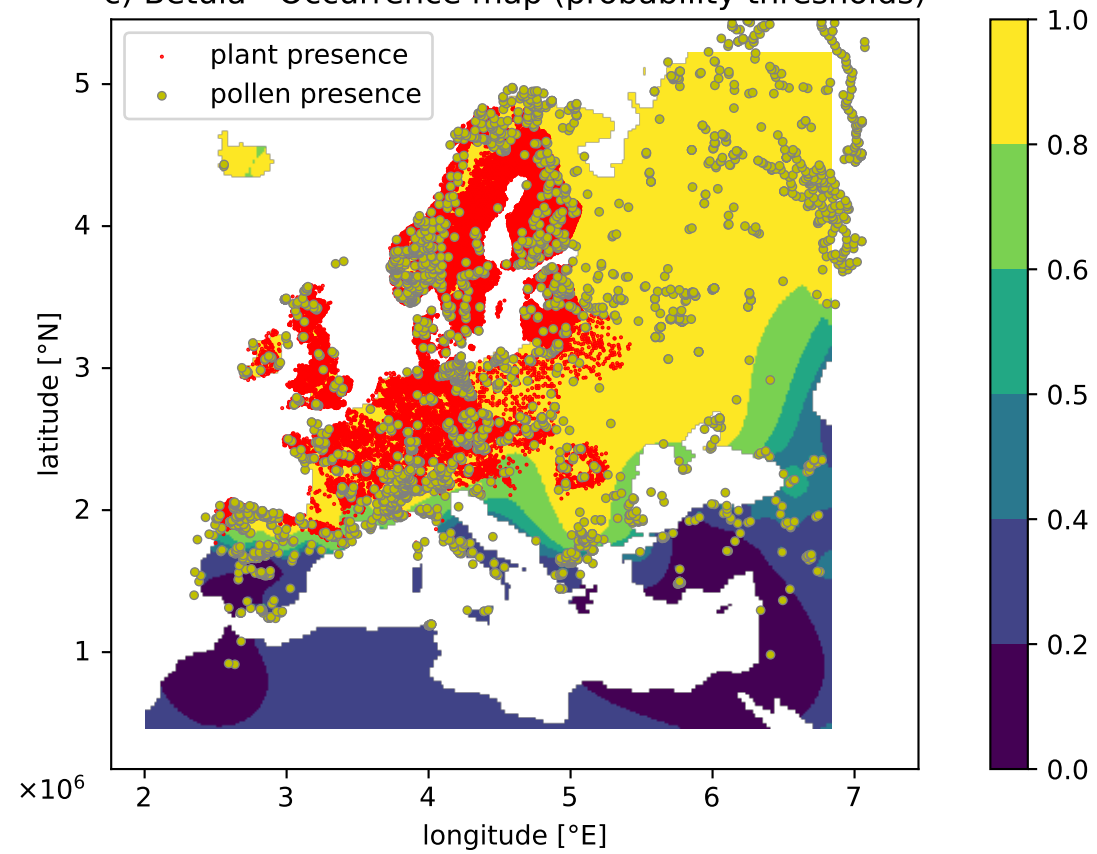

d) Betula - Occurrence uncertainty (Kriging variance)

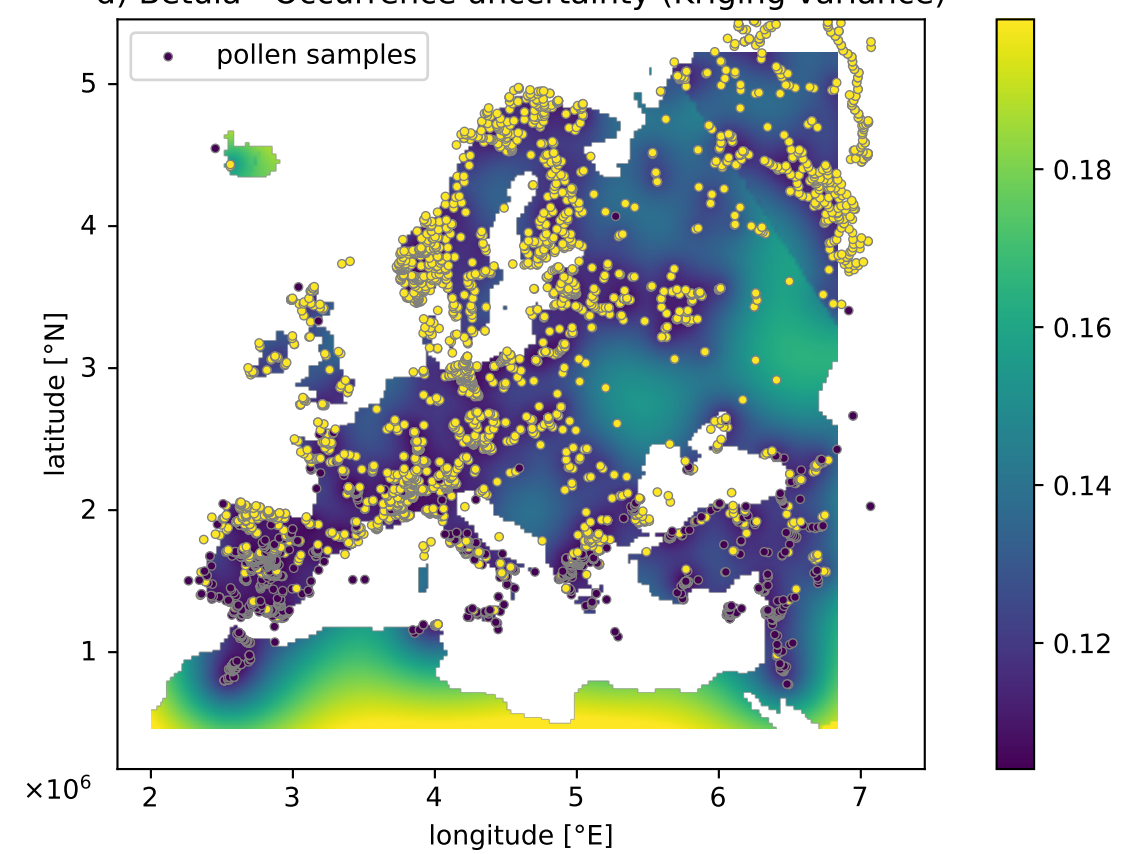

a) Ordinary Kriging - Cedrus - Occurrence probability (Kriging mean)

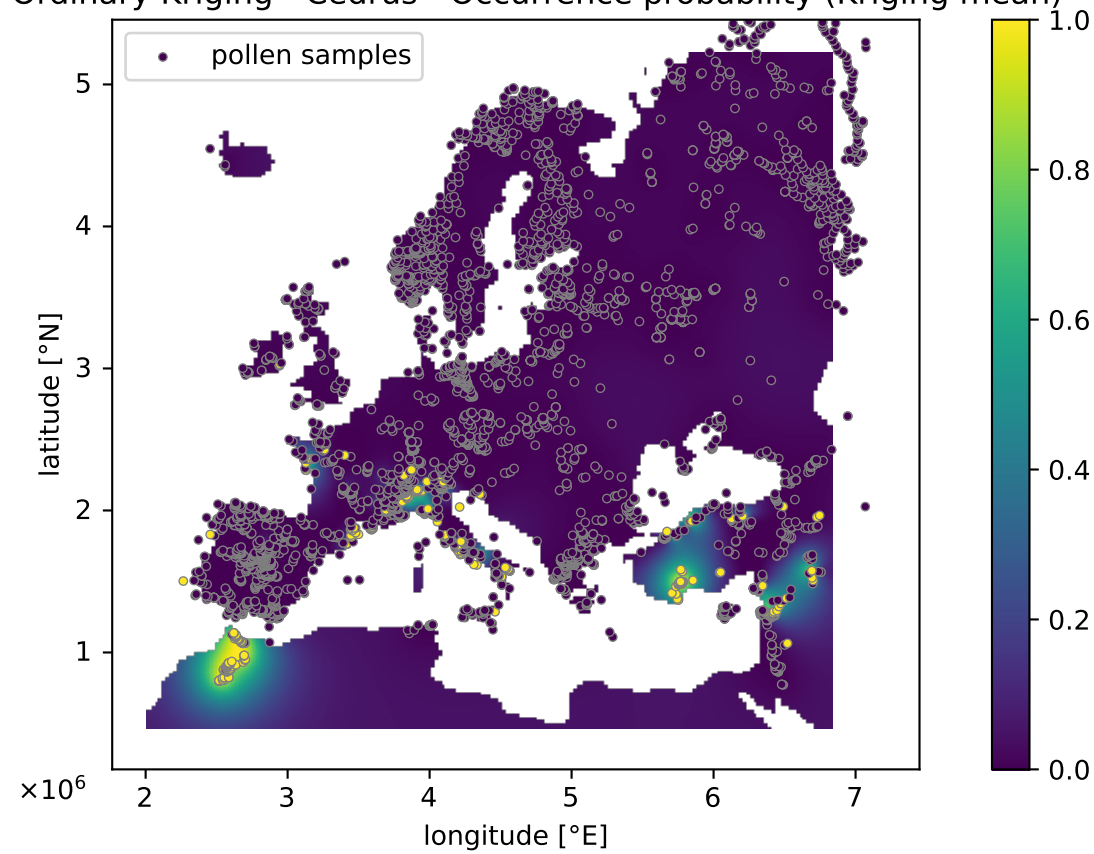

b) Cedrus - Semivariogram

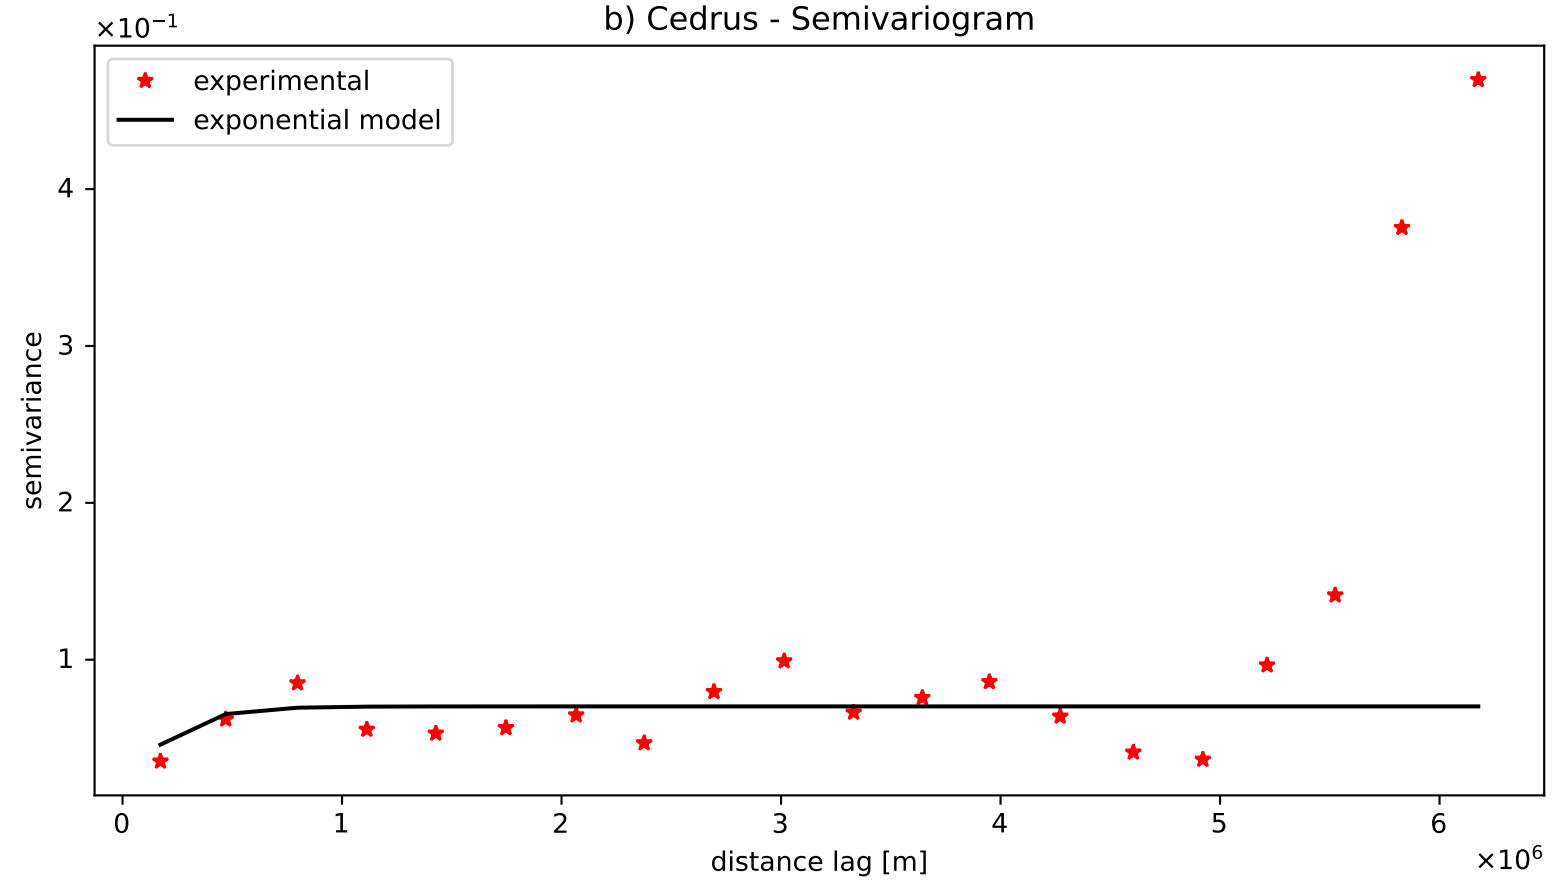

c) Cedrus - Occurrence map (probability thresholds)

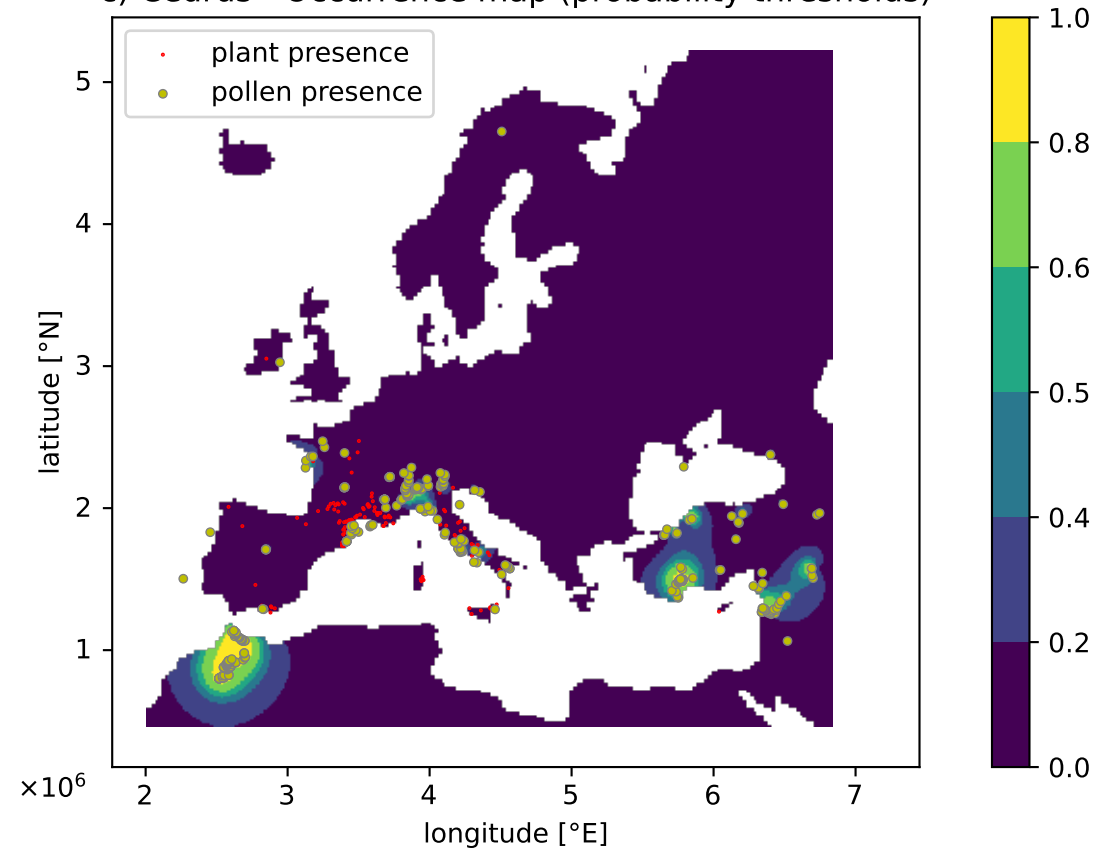

d) Cedrus - Occurrence uncertainty (Kriging variance)

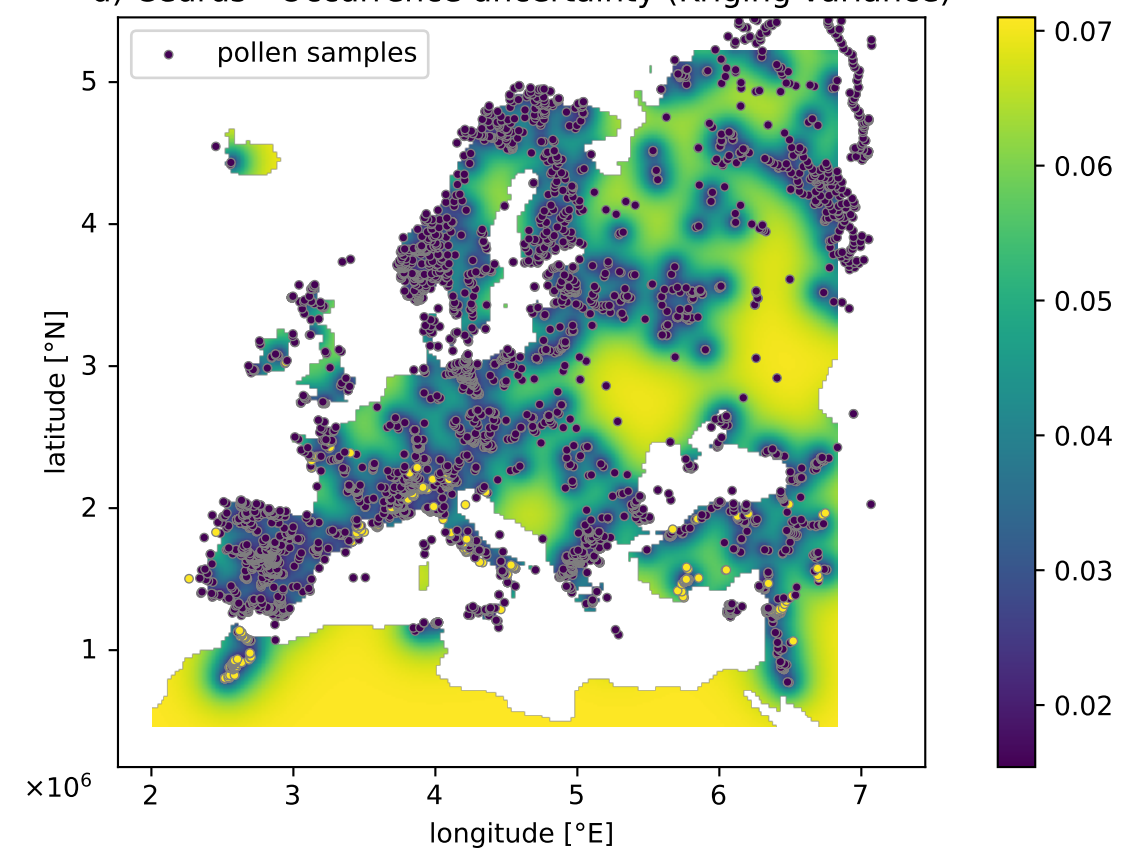

a) Universal Kriging - Cedrus - Occurrence probability (Kriging mean)

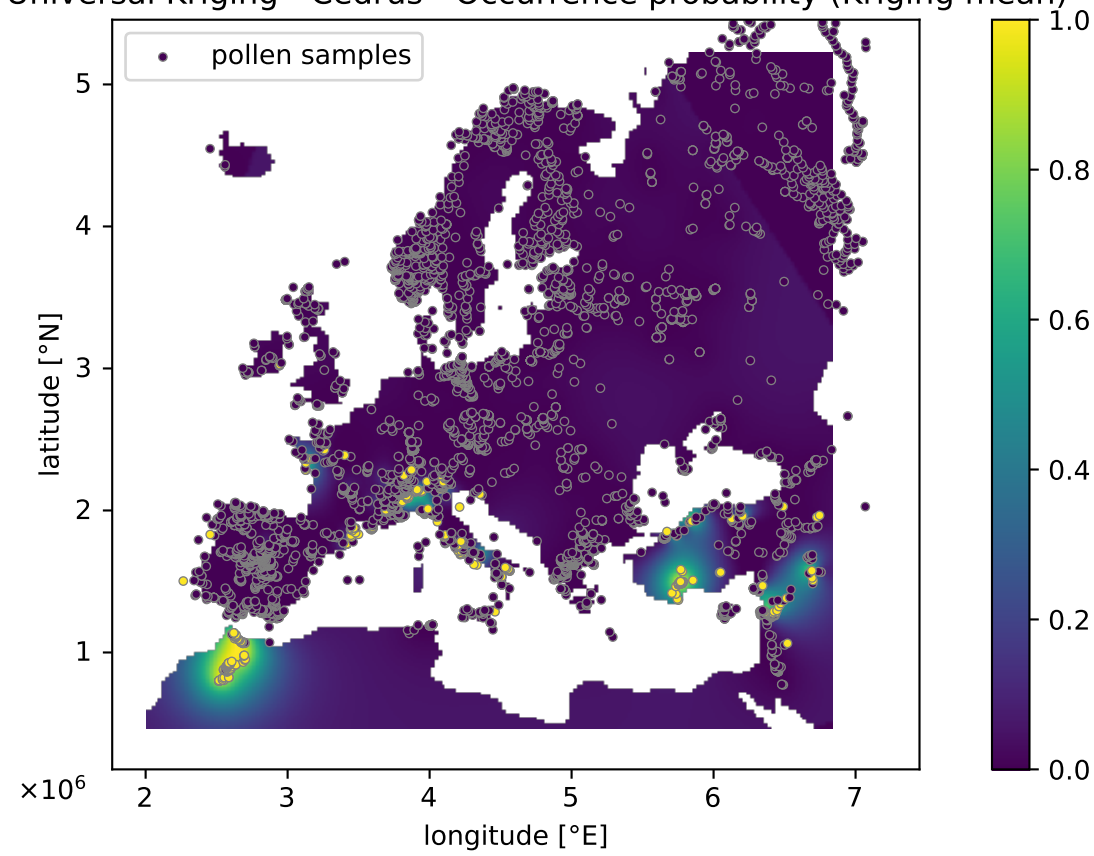

b) Cedrus - Semivariogram

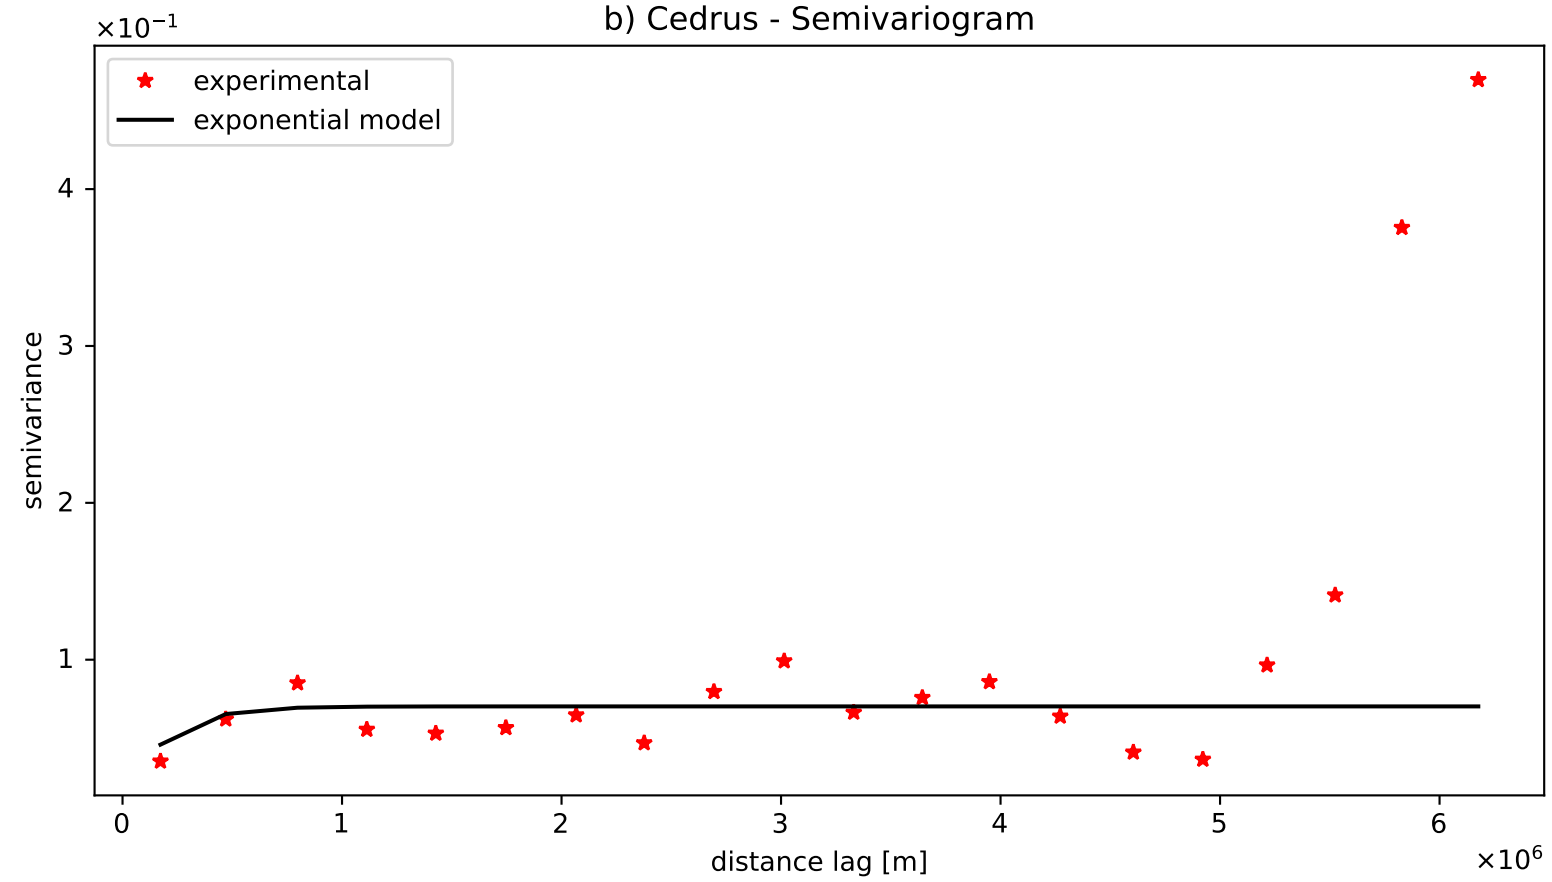

c) Cedrus - Occurrence map (probability thresholds)

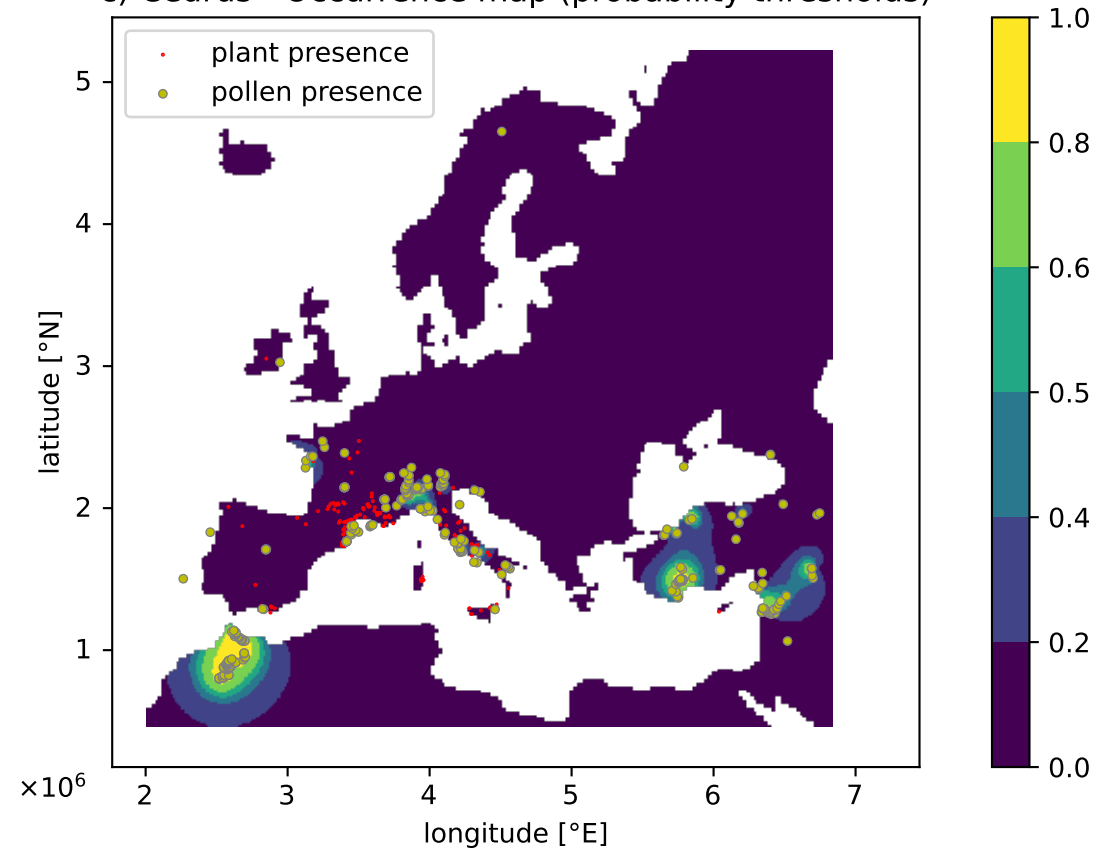

d) Cedrus - Occurrence uncertainty (Kriging variance)

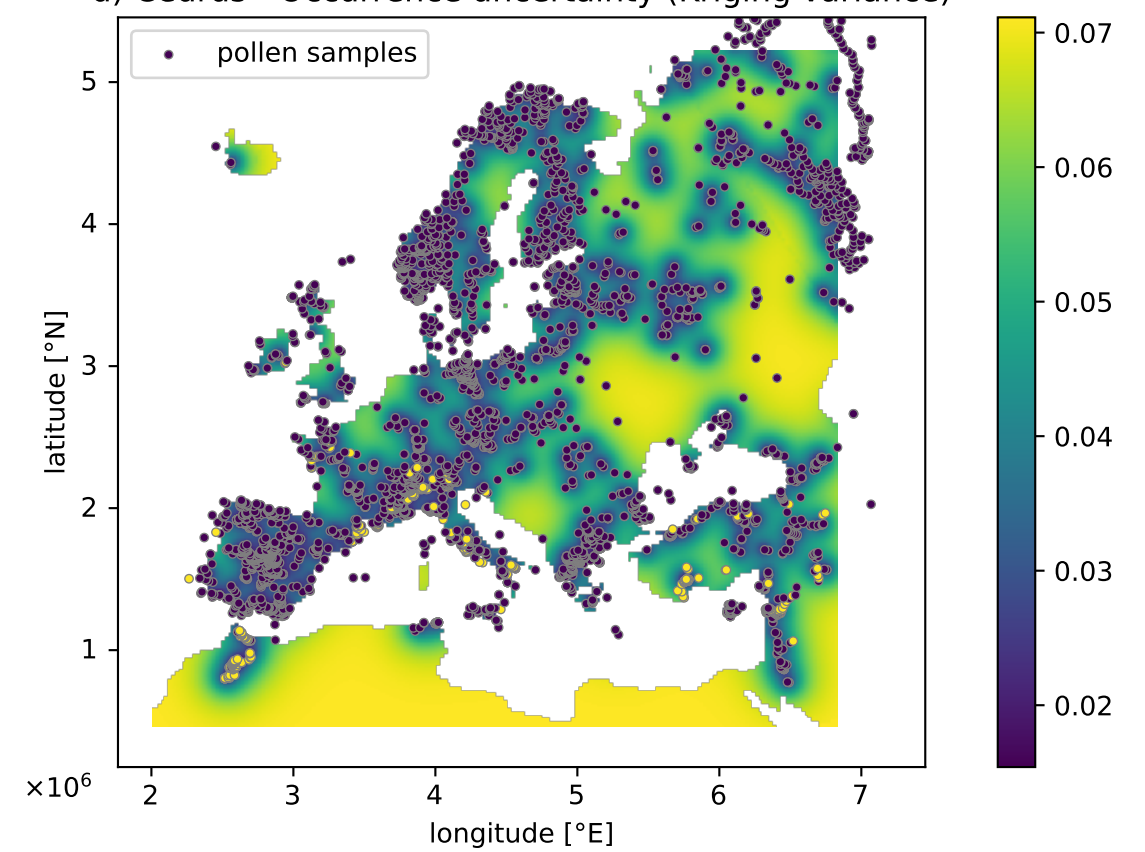



a) Ordinary Kriging - Corylus - Occurrence probability (Kriging mean)

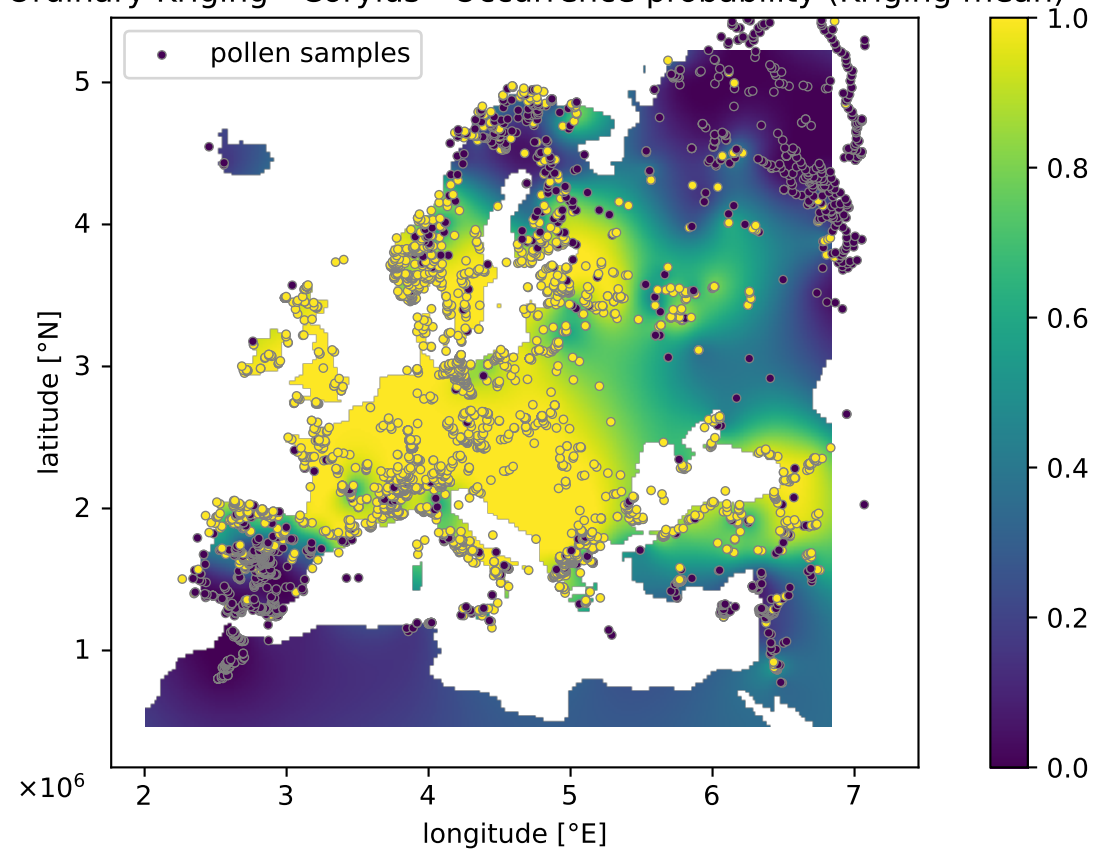

b) Corylus - Semivariogram

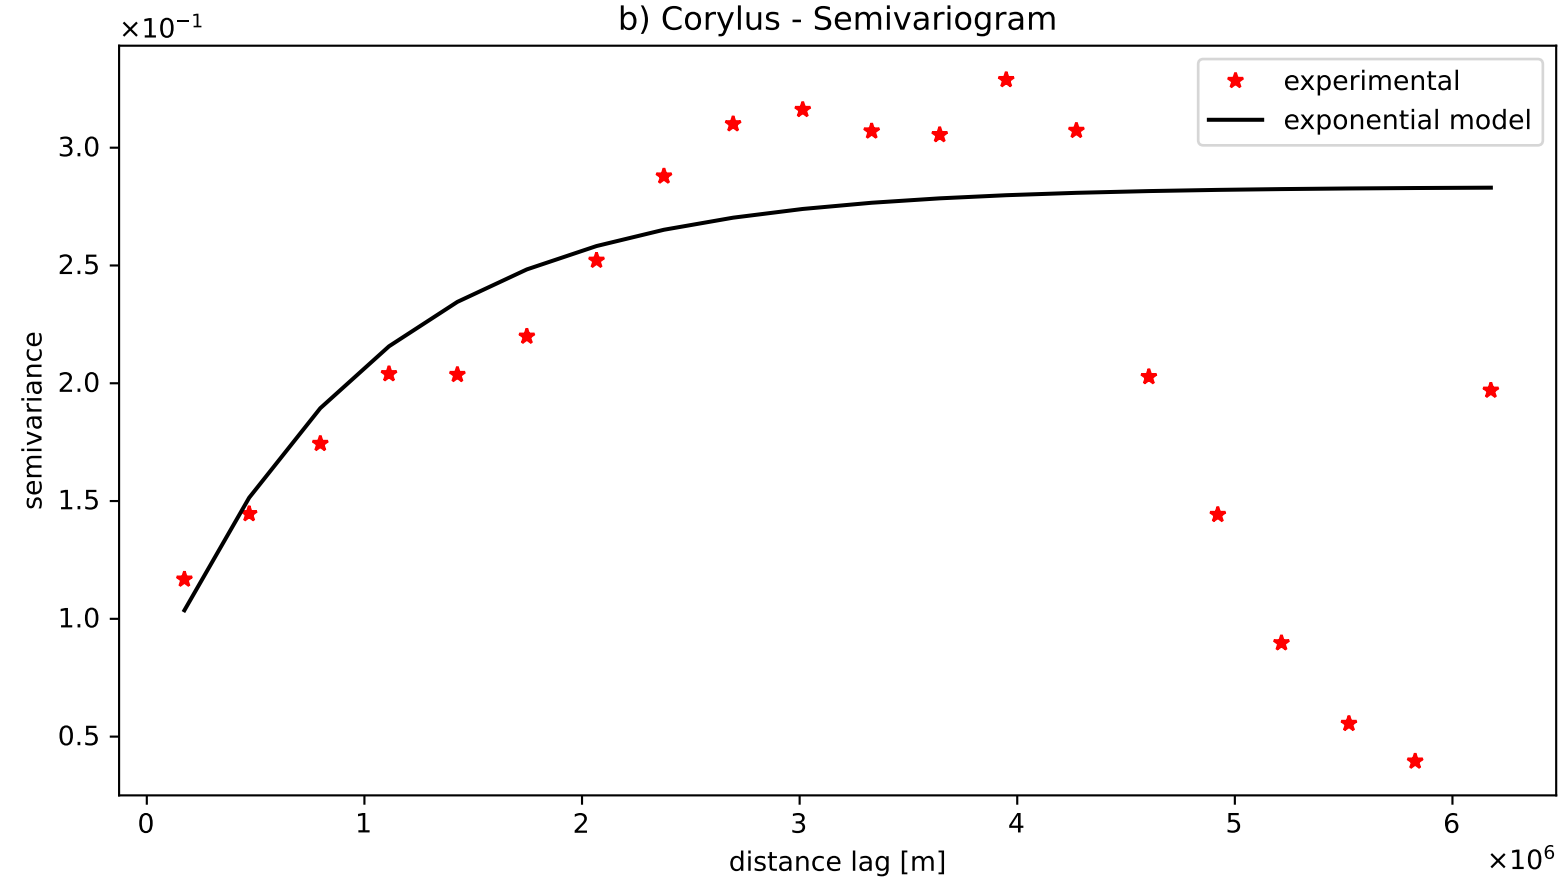

c) Corylus - Occurrence map (probability thresholds)

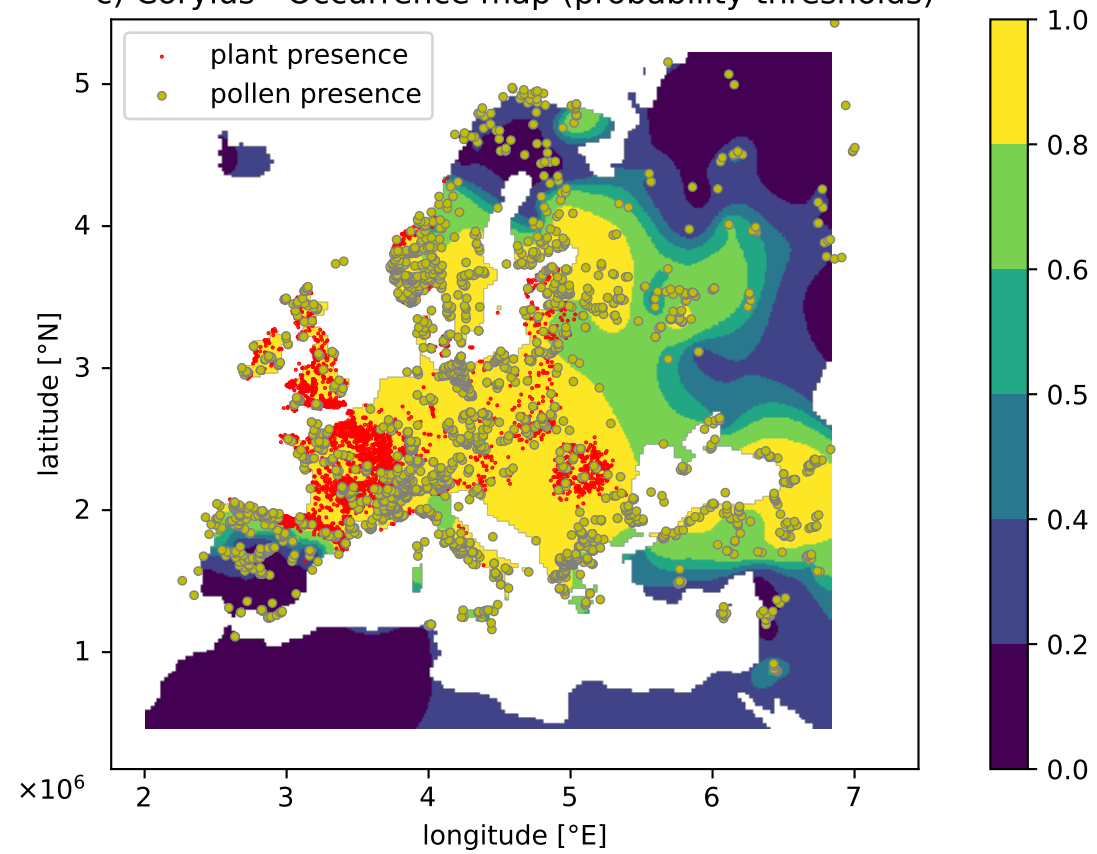

d) Corylus - Occurrence uncertainty (Kriging variance)

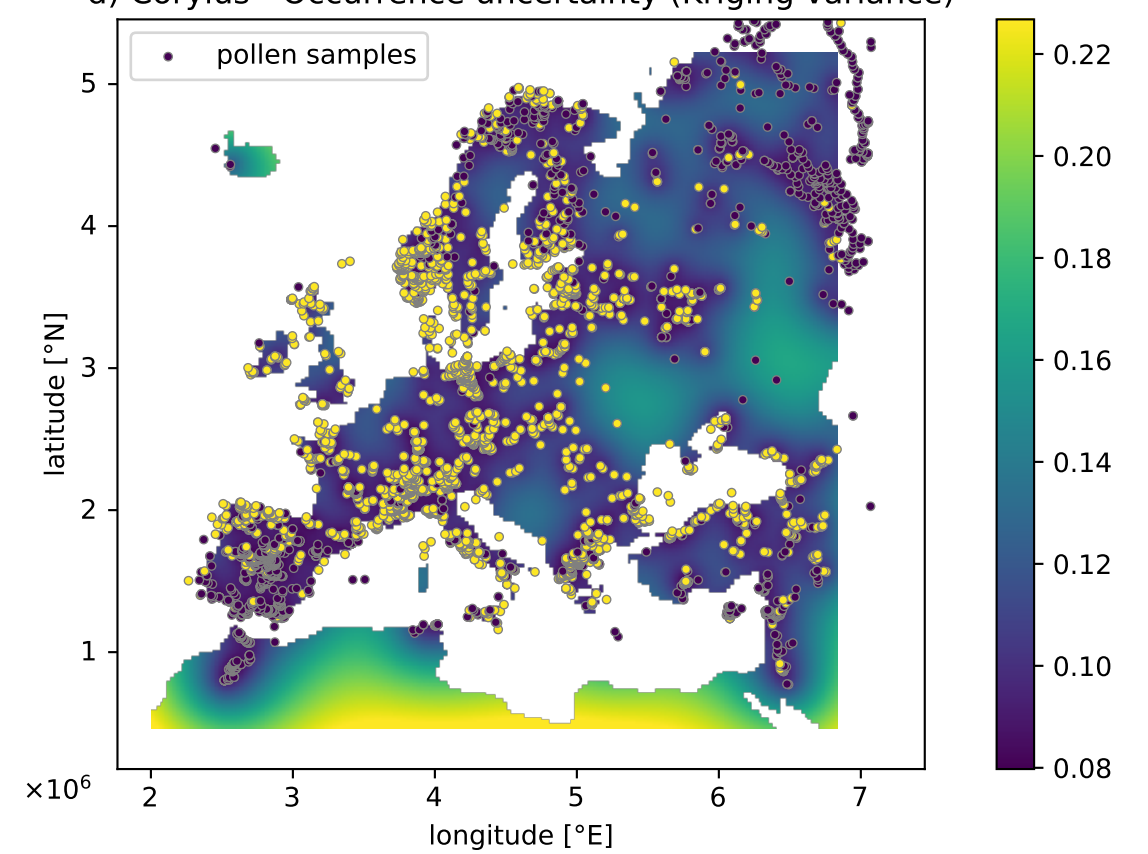



a) Universal Kriging - Corylus - Occurrence probability (Kriging mean)

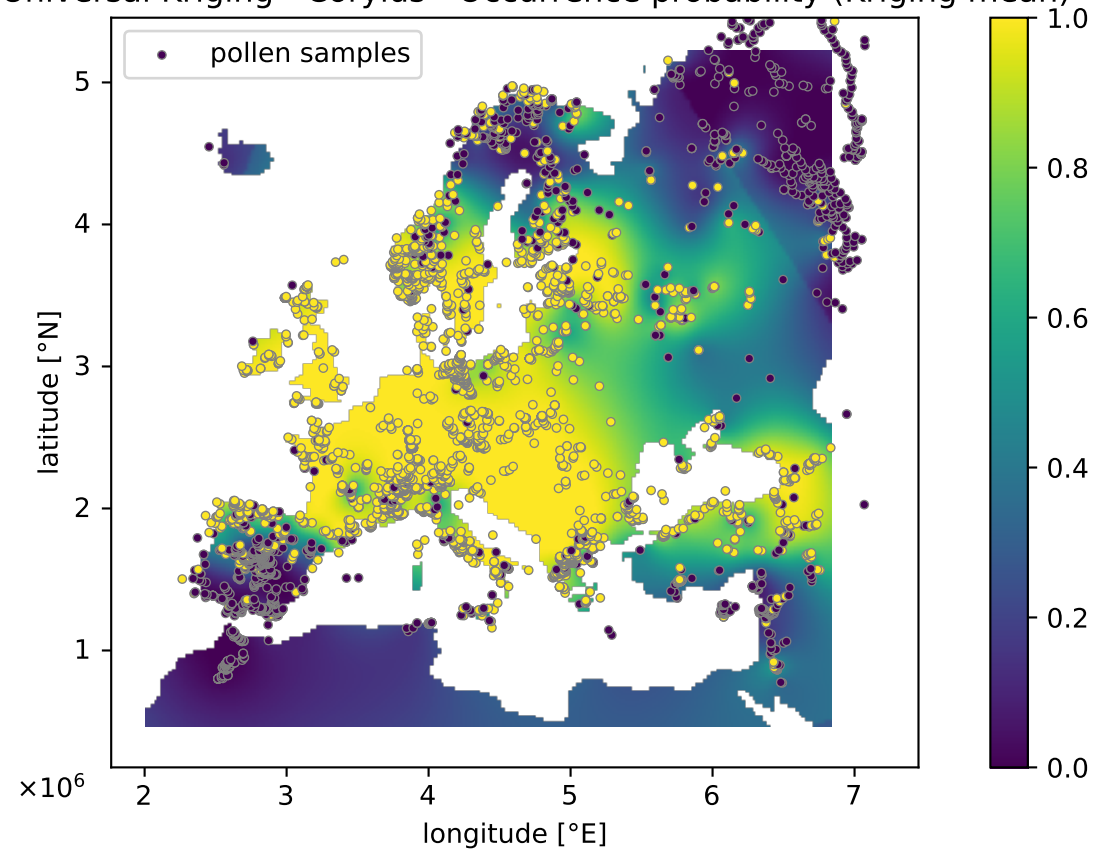

b) Corylus - Semivariogram



c) Corylus - Occurrence map (probability thresholds)

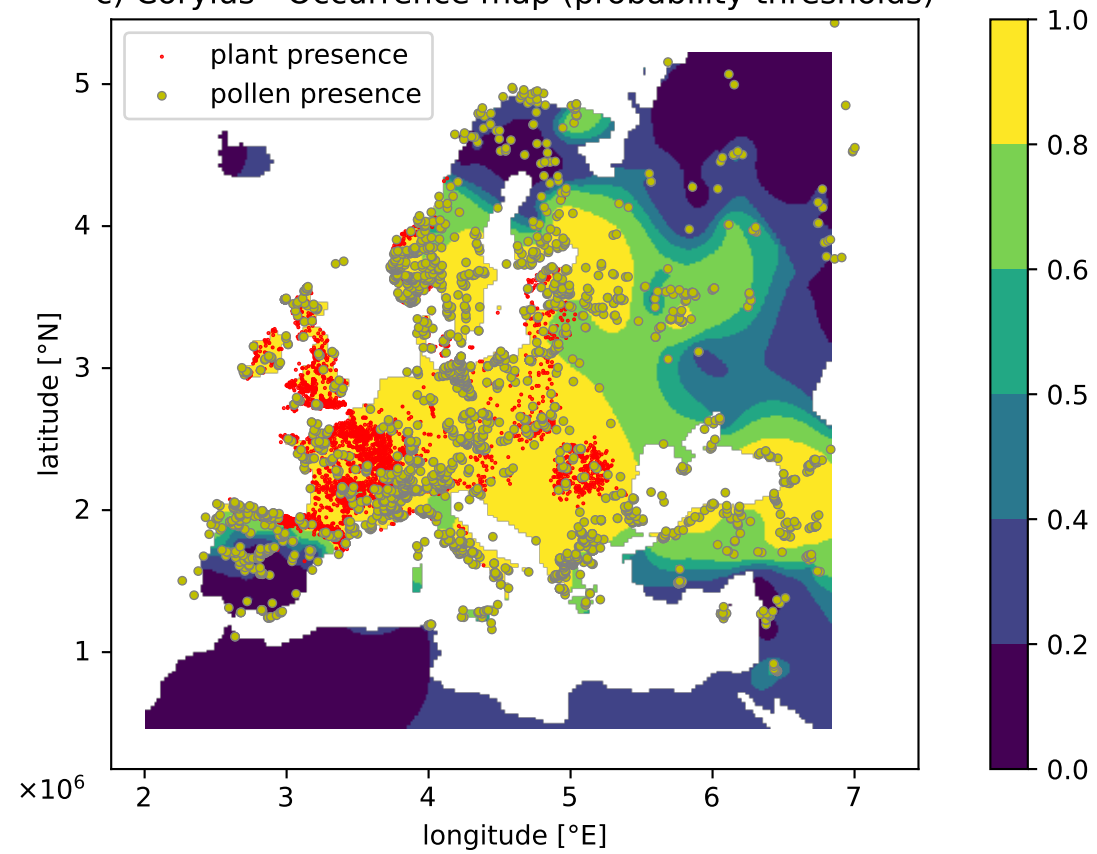

d) Corylus - Occurrence uncertainty (Kriging variance)

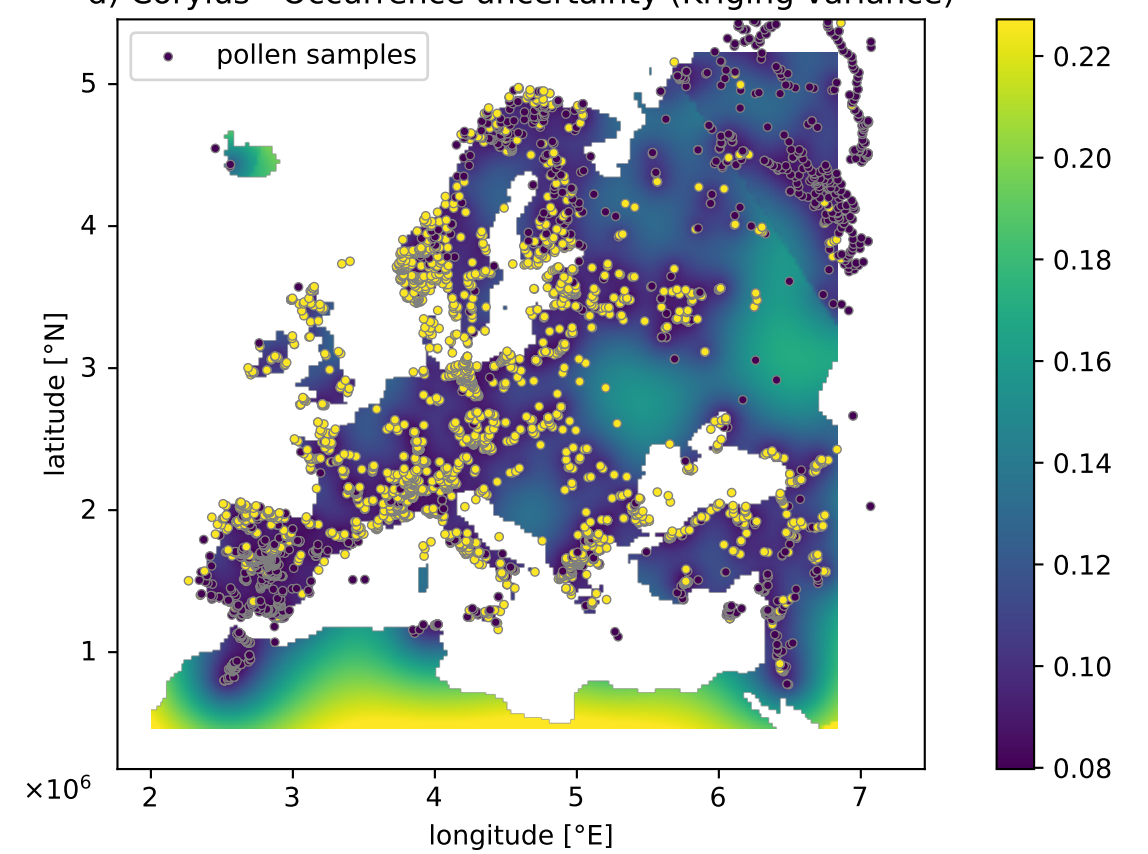

a) Ordinary Kriging - Fagus - Occurrence probability (Kriging mean)

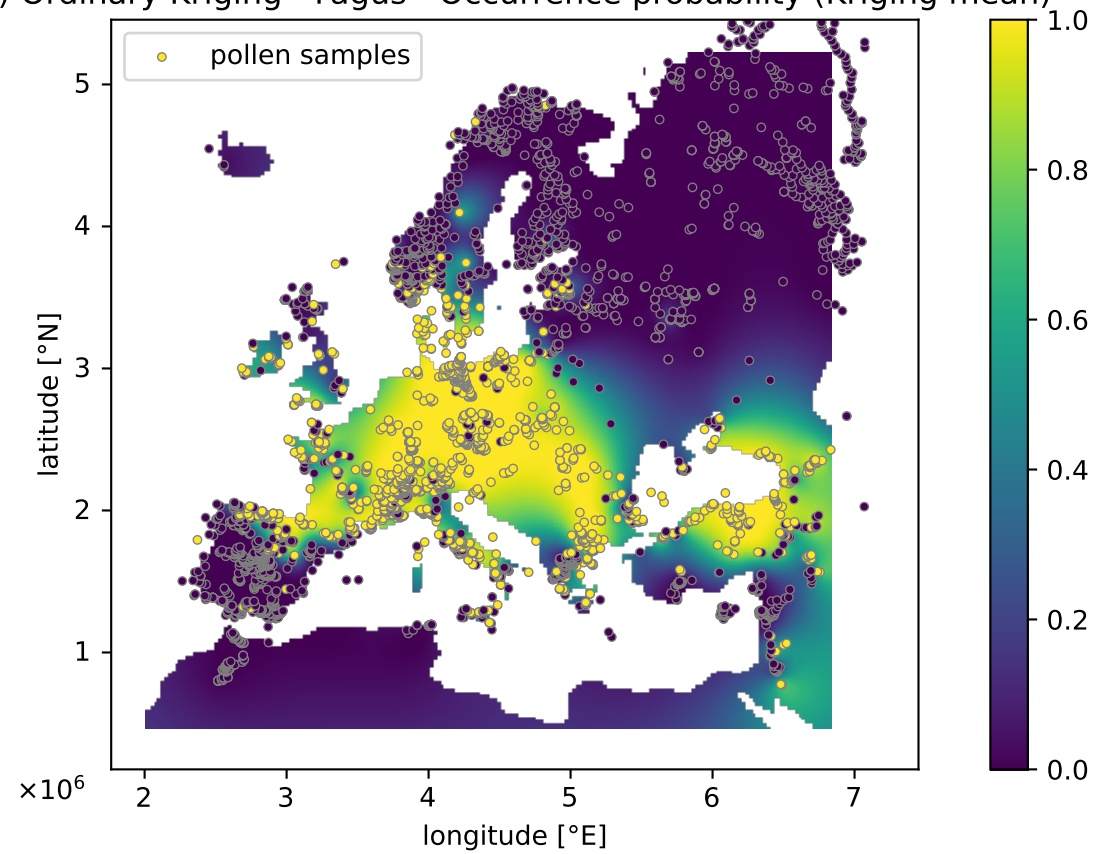

b) Fagus - Semivariogram

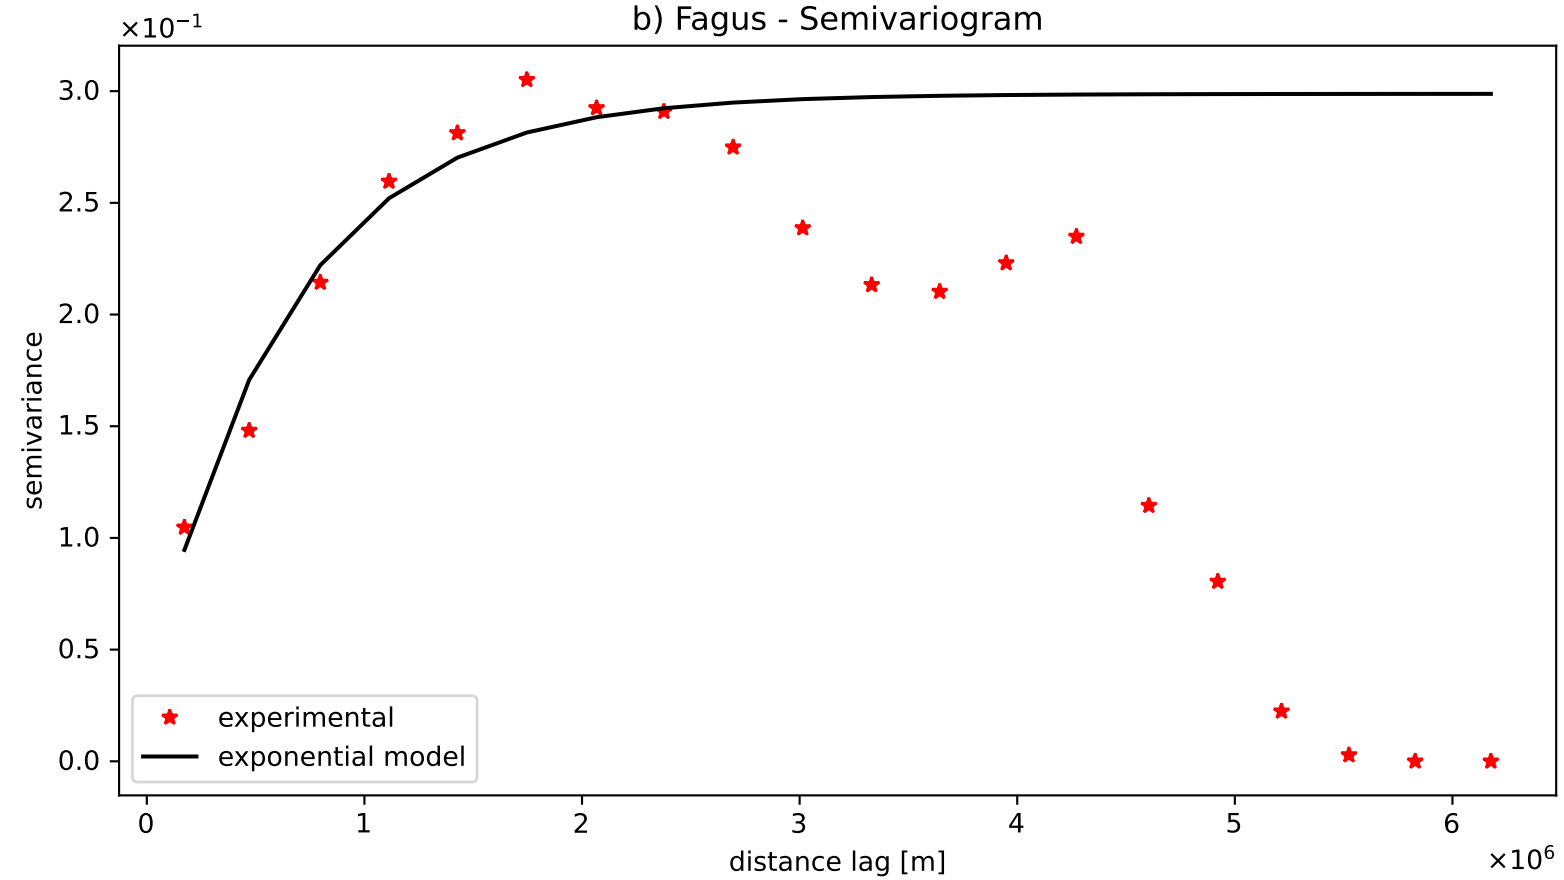

c) Fagus - Occurrence map (probability thresholds)

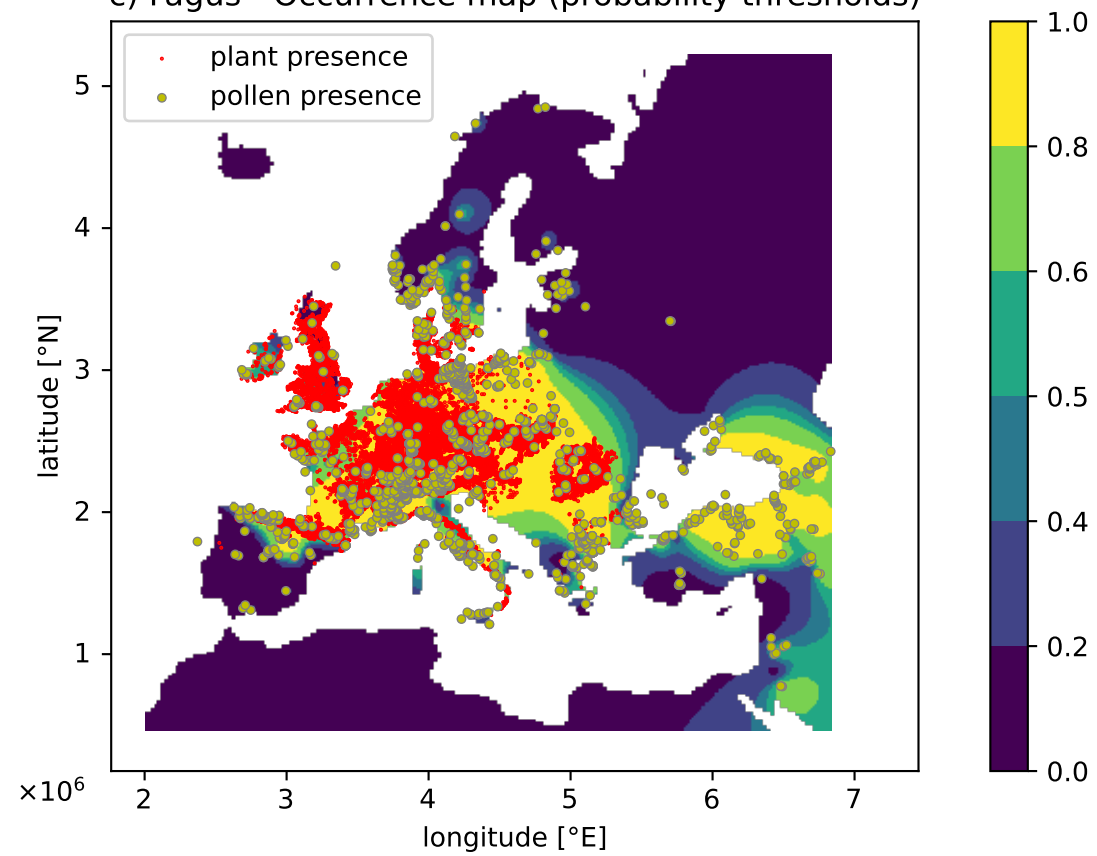

d) Fagus - Occurrence uncertainty (Kriging variance)

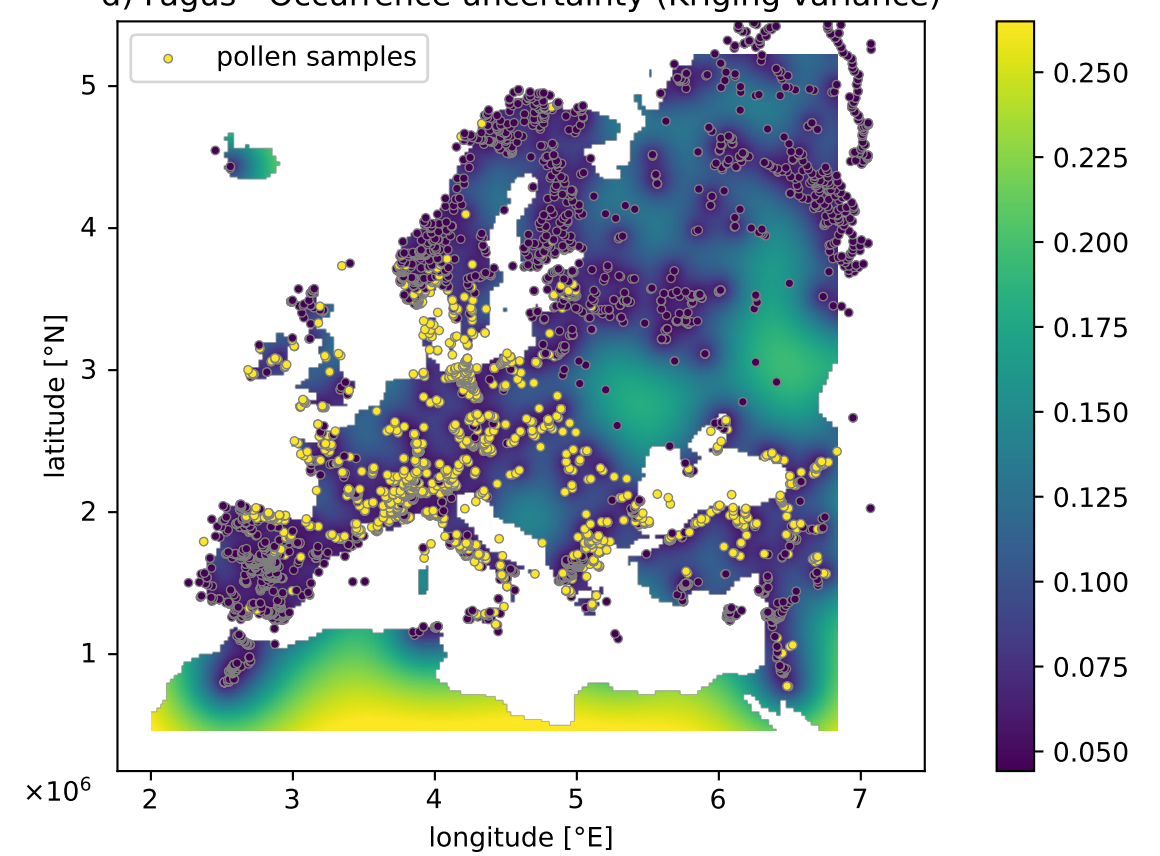

a) Universal Kriging - Fagus - Occurrence probability (Kriging mean)

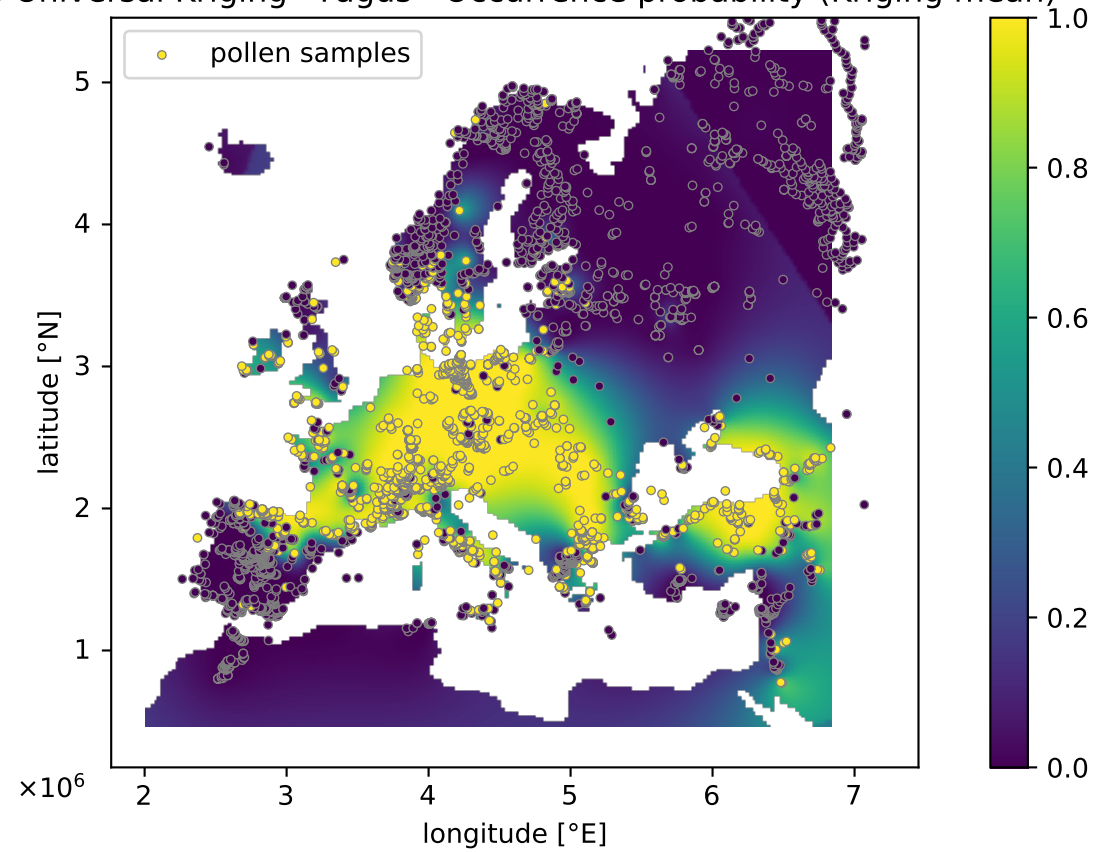

b) Fagus - Semivariogram

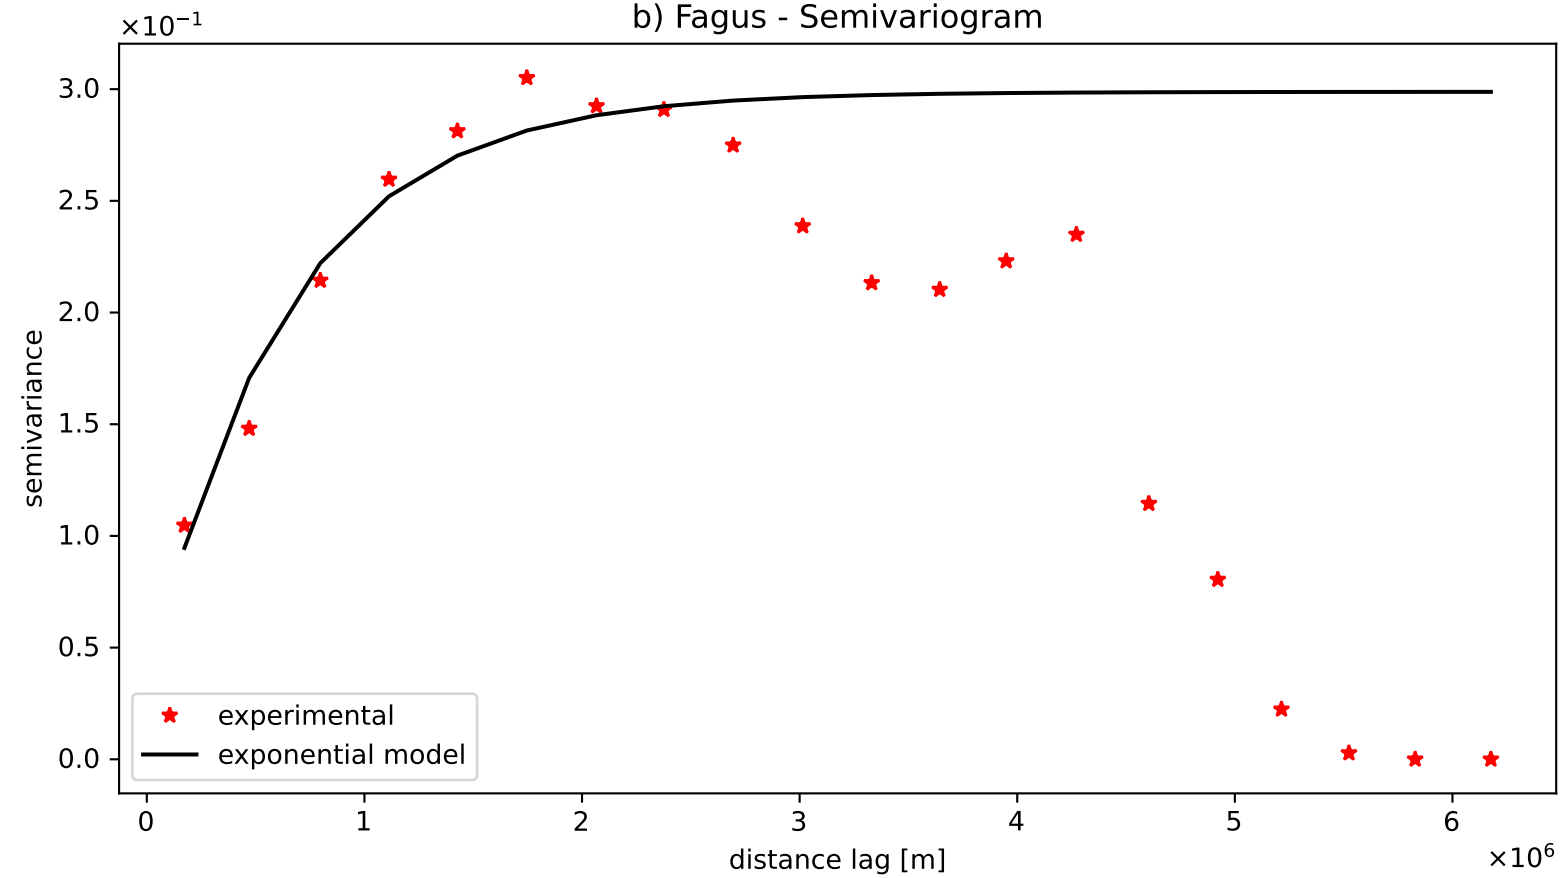

c) Fagus - Occurrence map (probability thresholds)

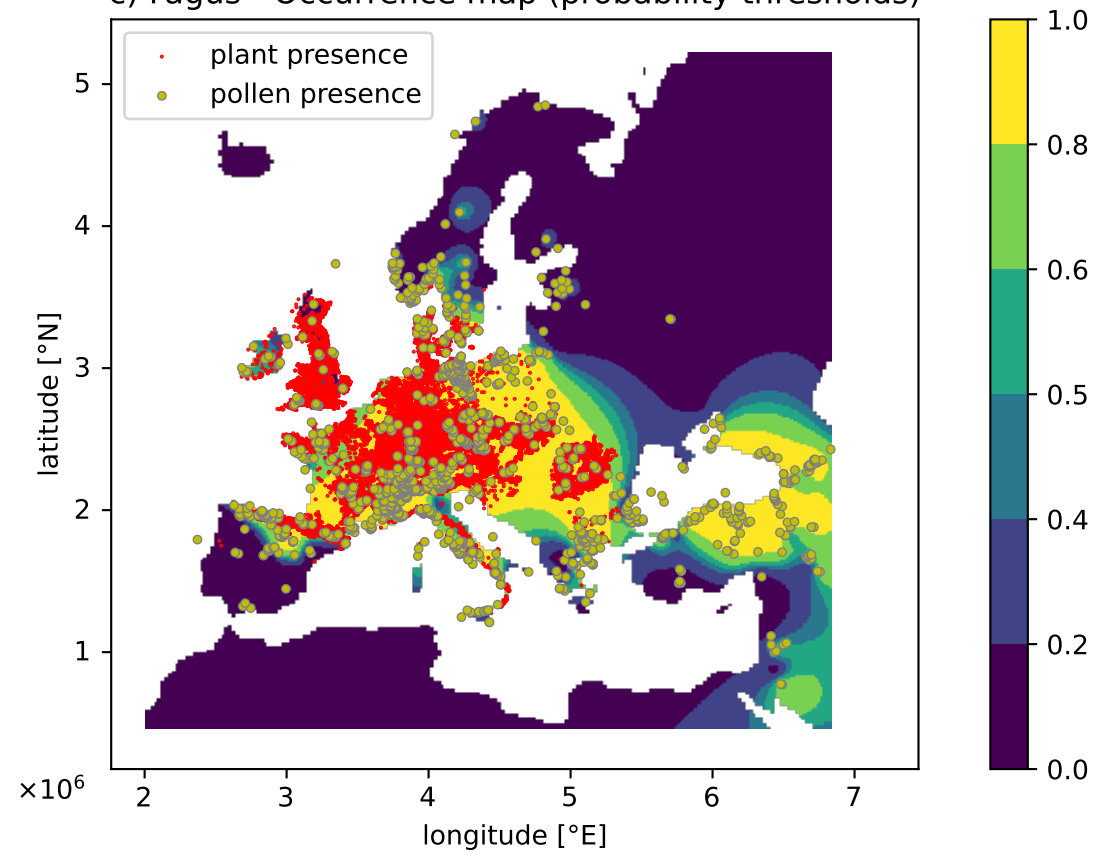

d) Fagus - Occurrence uncertainty (Kriging variance)

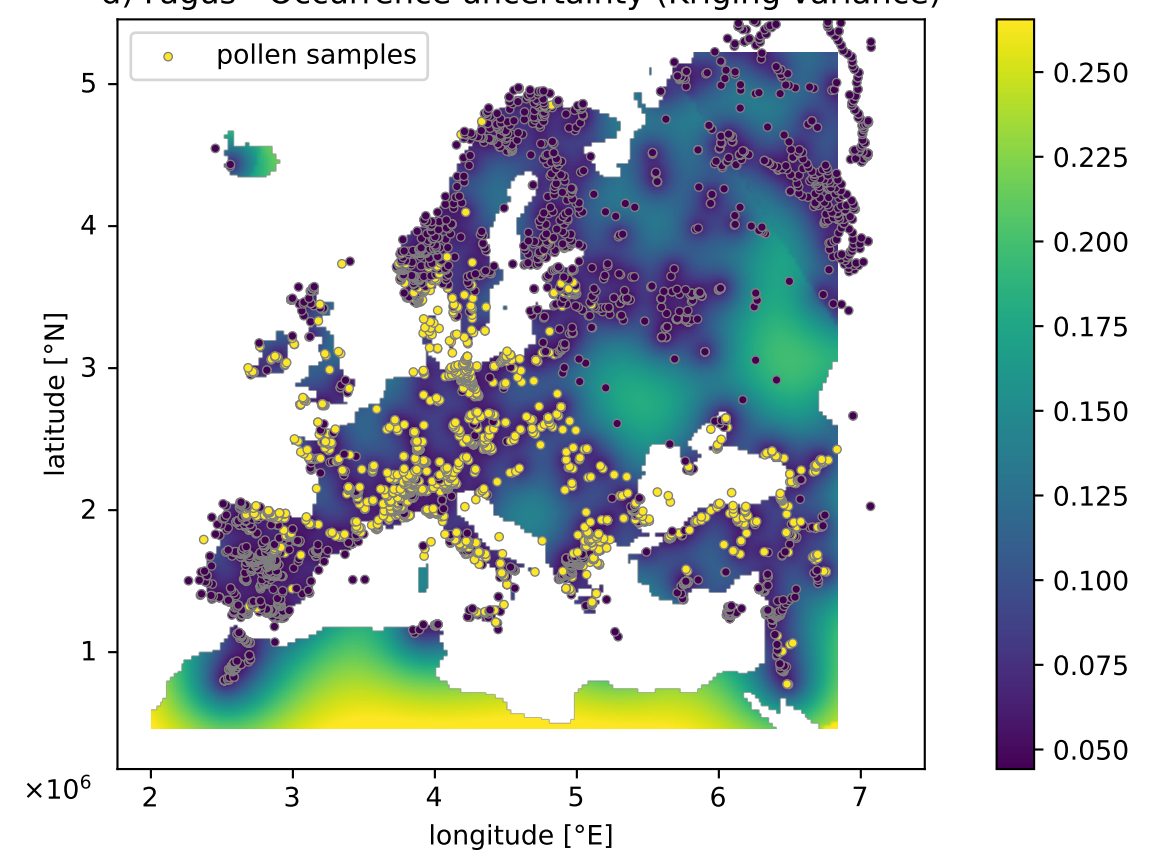



a) Ordinary Kriging - Juglans - Occurrence probability (Kriging mean)

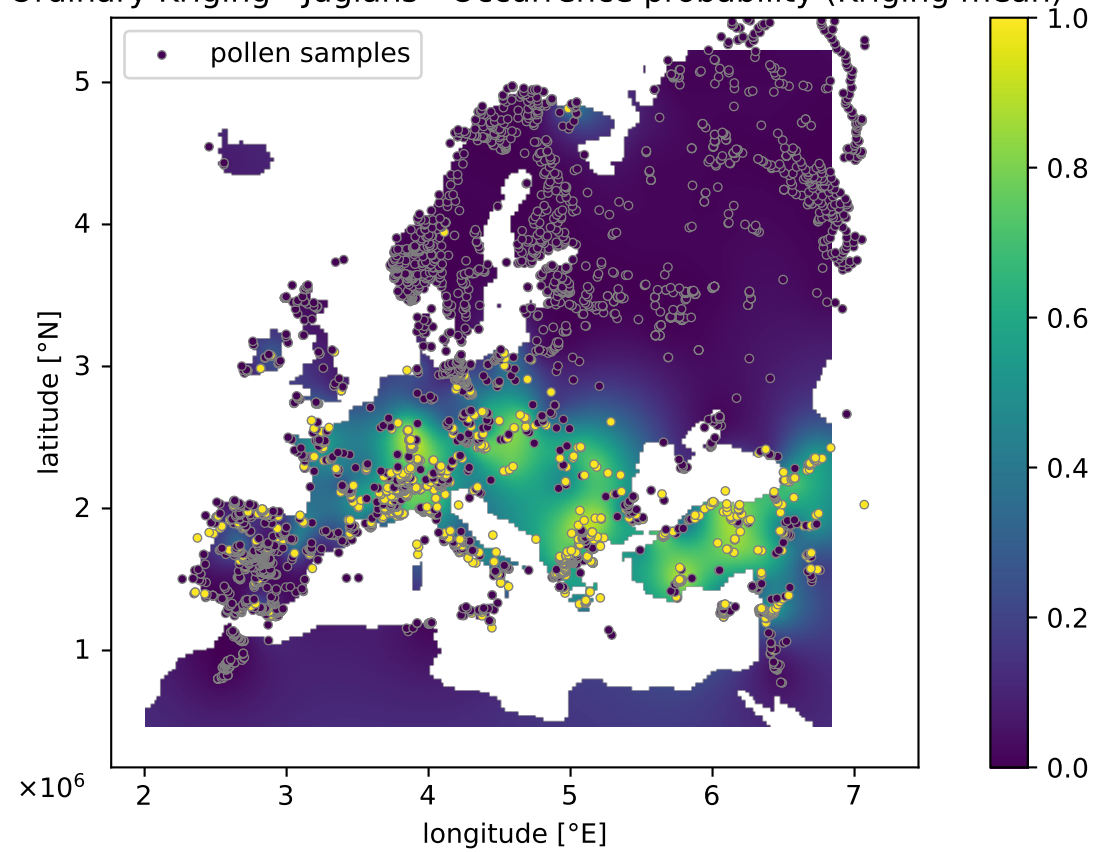

b) Juglans - Semivariogram

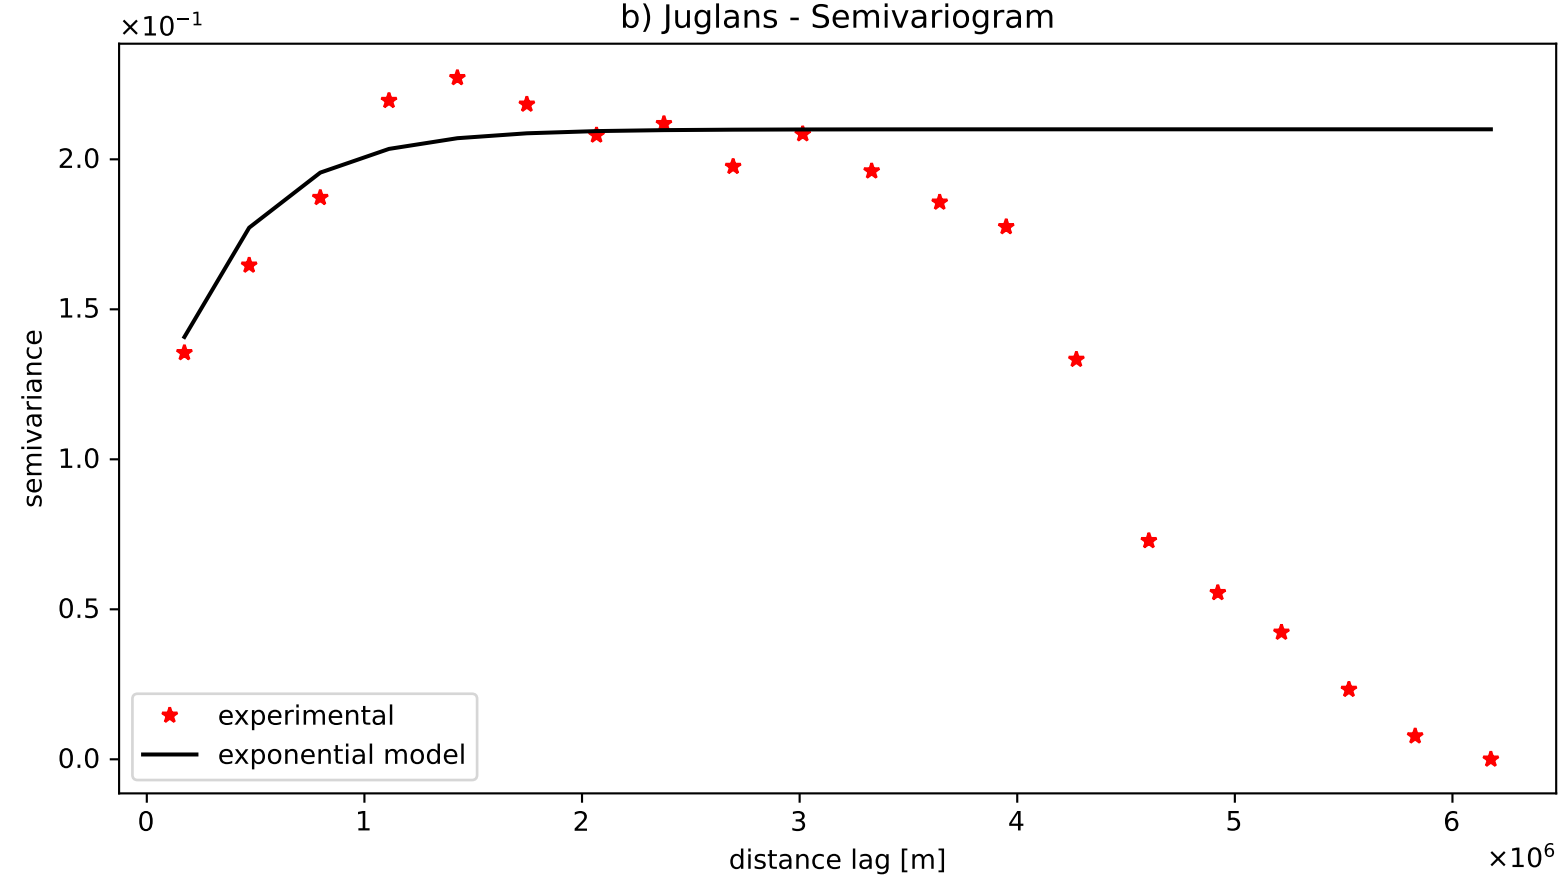

c) Juglans - Occurrence map (probability thresholds)

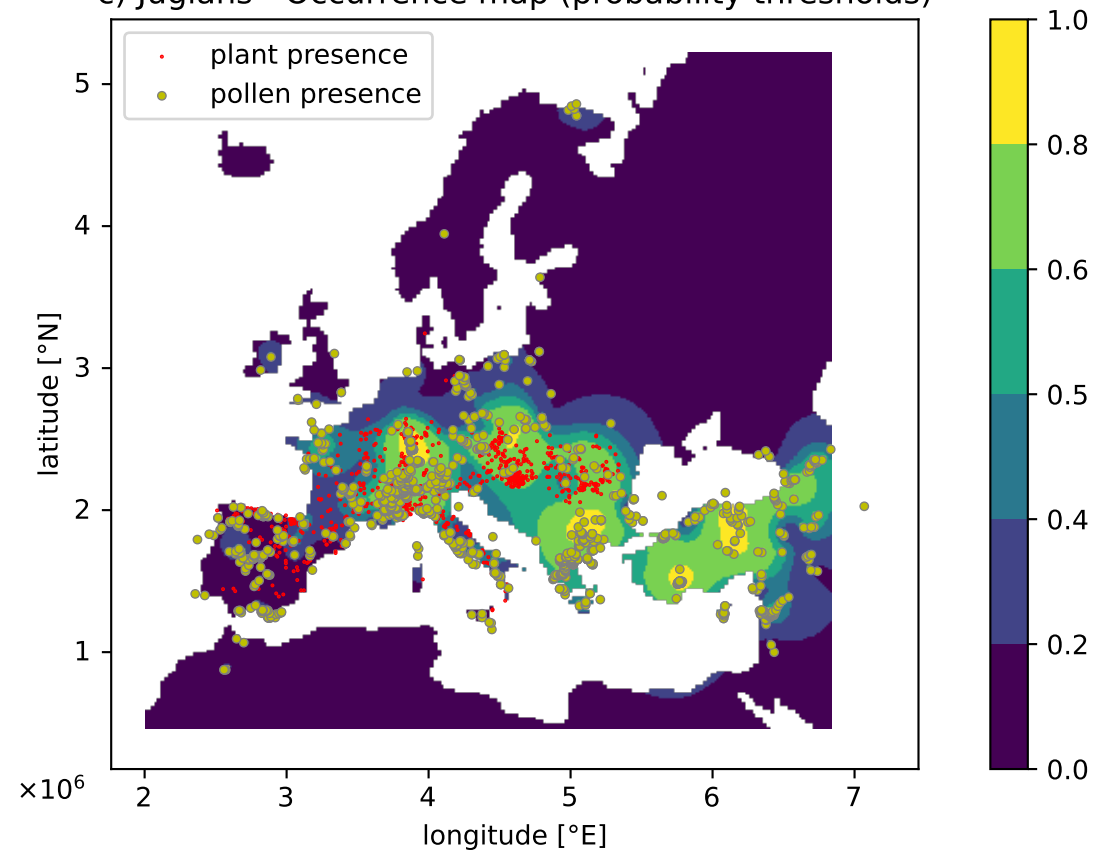

d) Juglans - Occurrence uncertainty (Kriging variance)

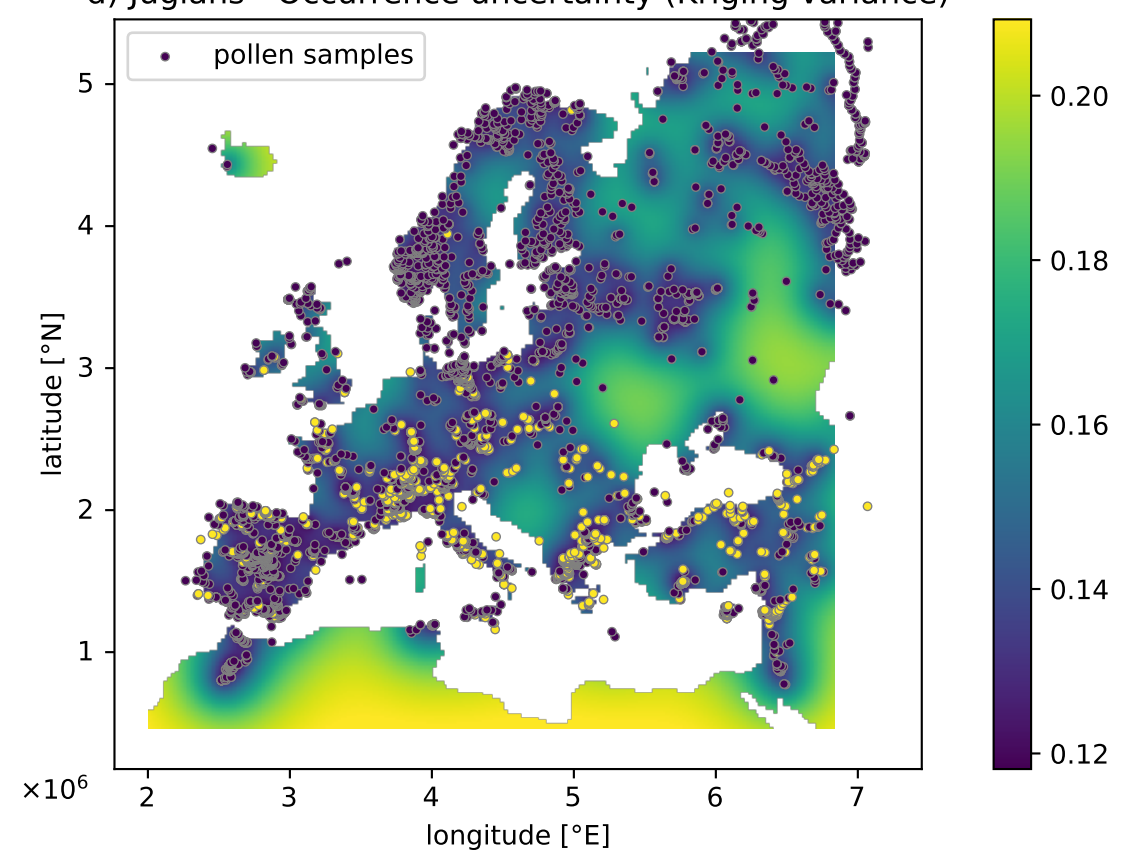



a) Universal Kriging - Juglans - Occurrence probability (Kriging mean)

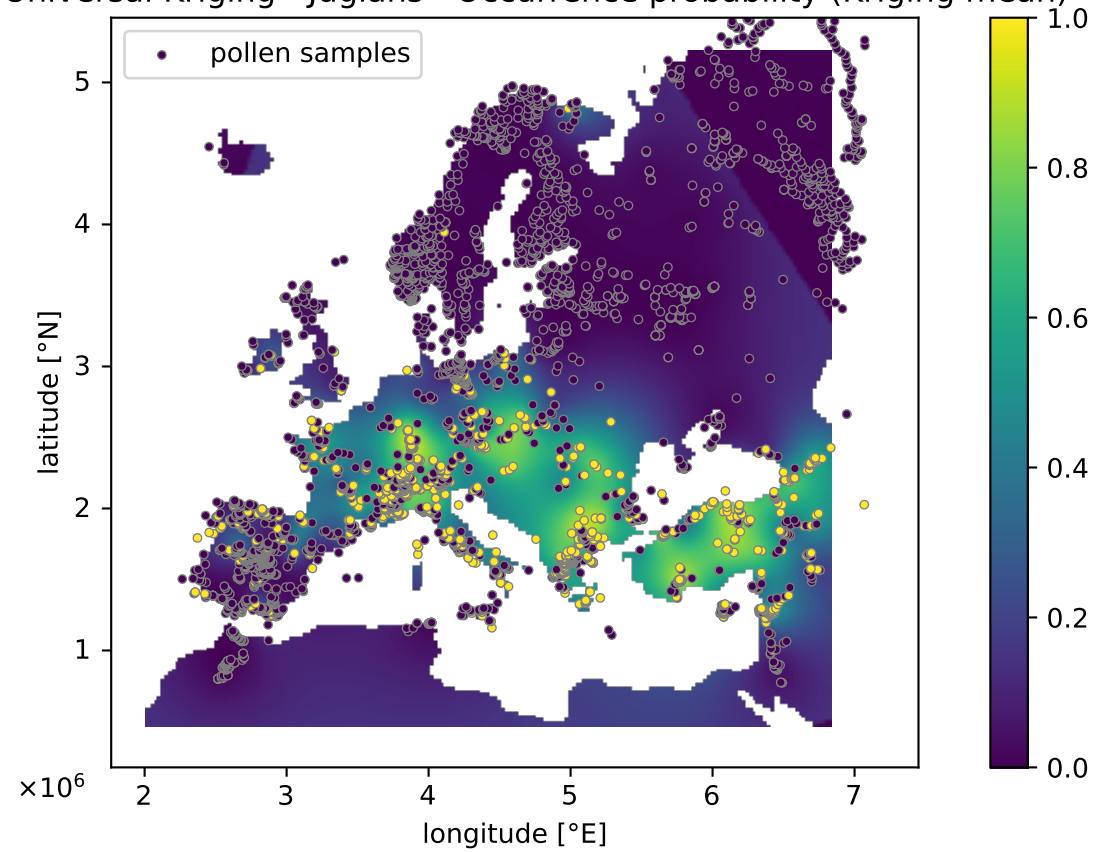

b) Juglans - Semivariogram

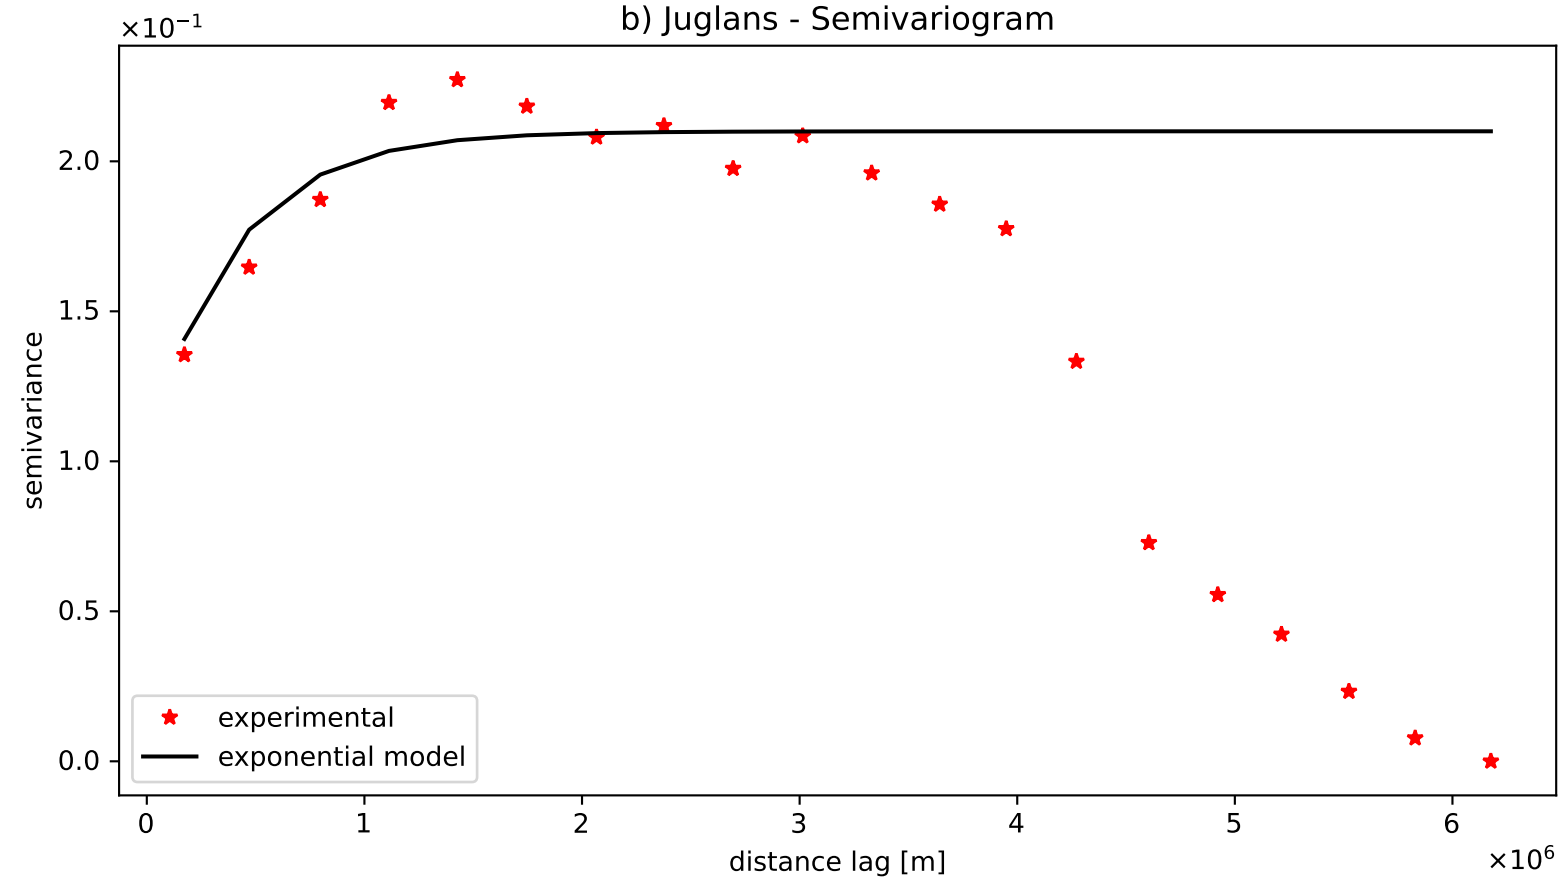

c) Juglans - Occurrence map (probability thresholds)

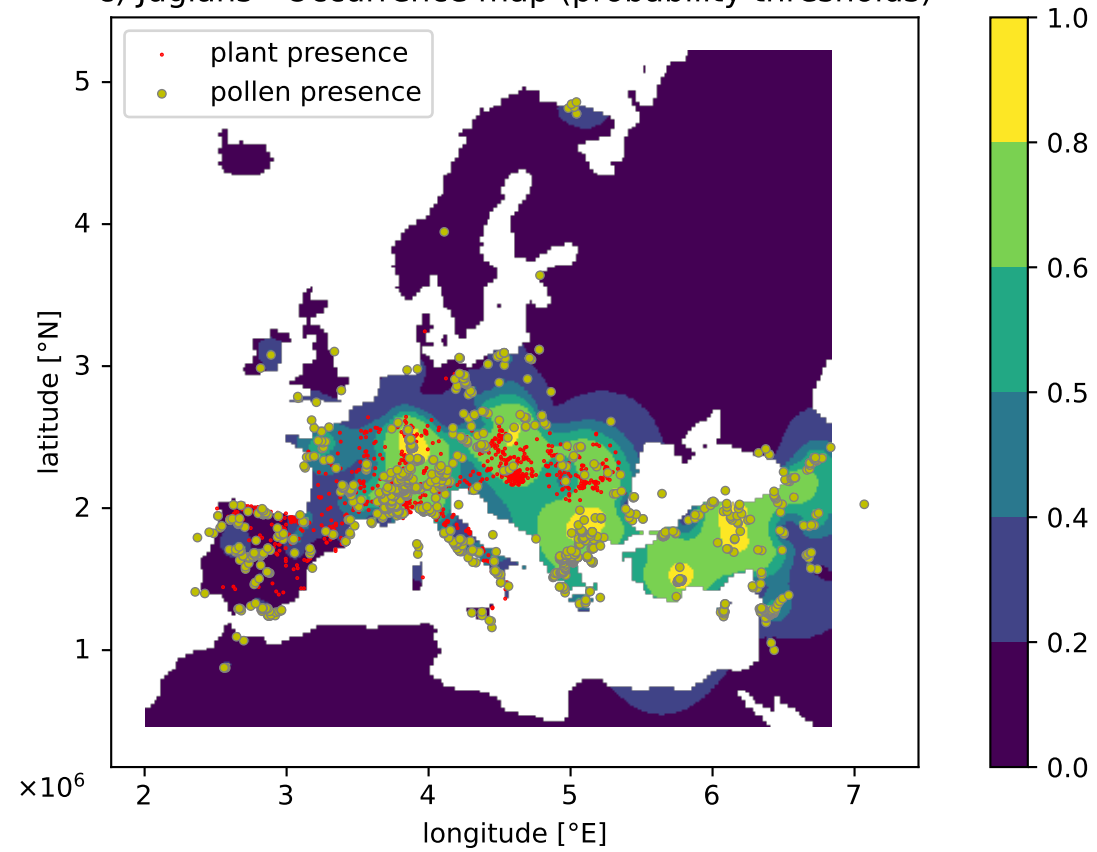

d) Juglans - Occurrence uncertainty (Kriging variance)

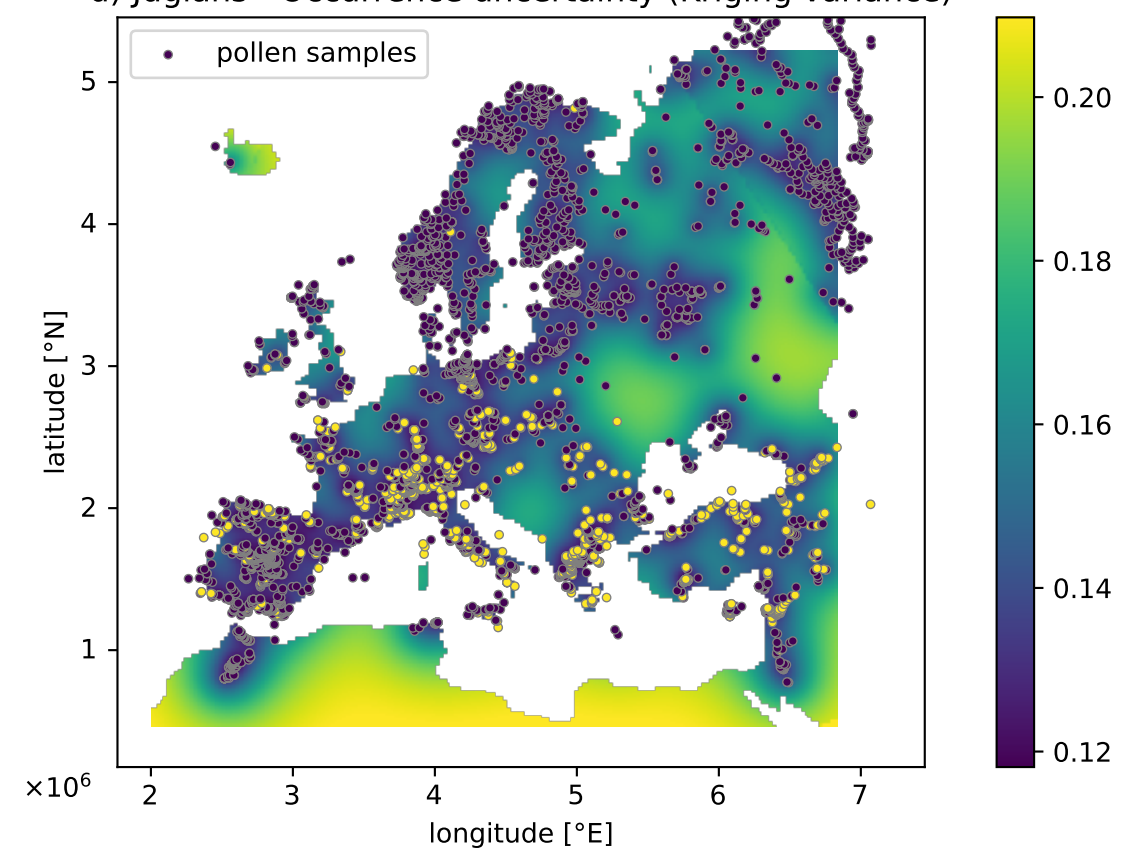

a) Ordinary Kriging - Myrica - Occurrence probability (Kriging mean)

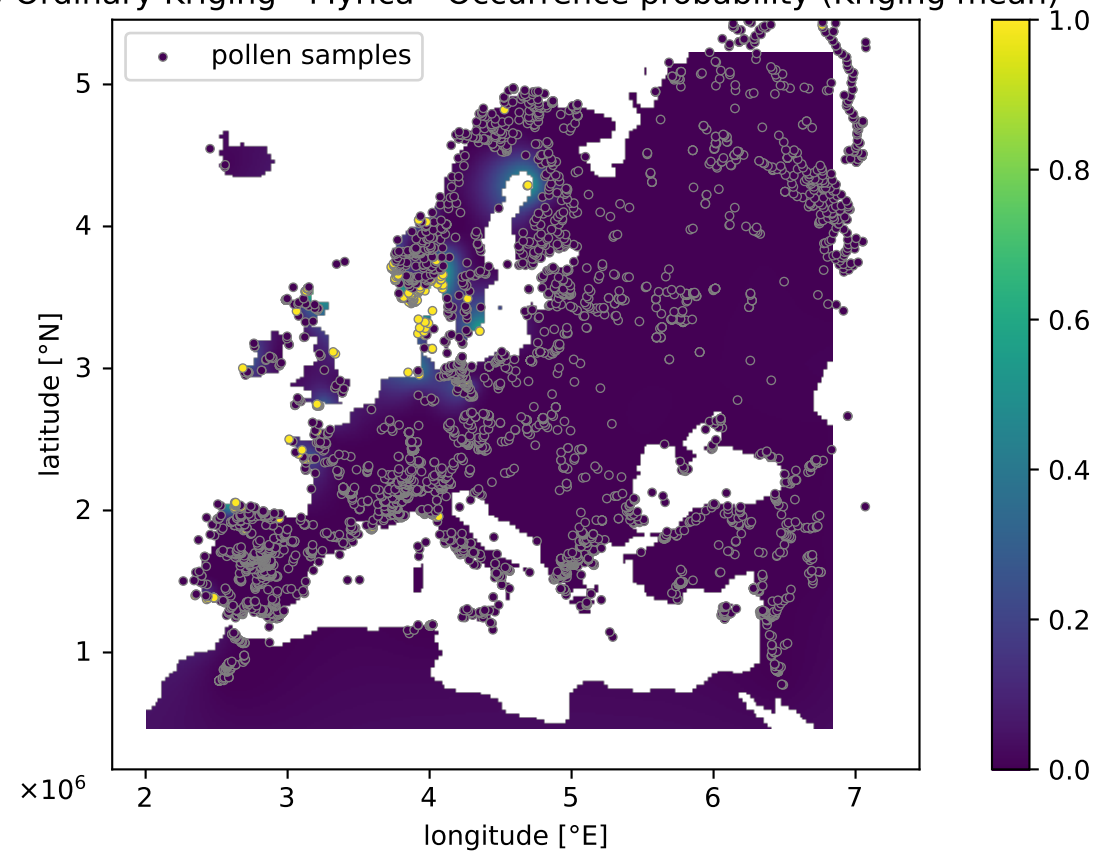

b) Myrica - Semivariogram

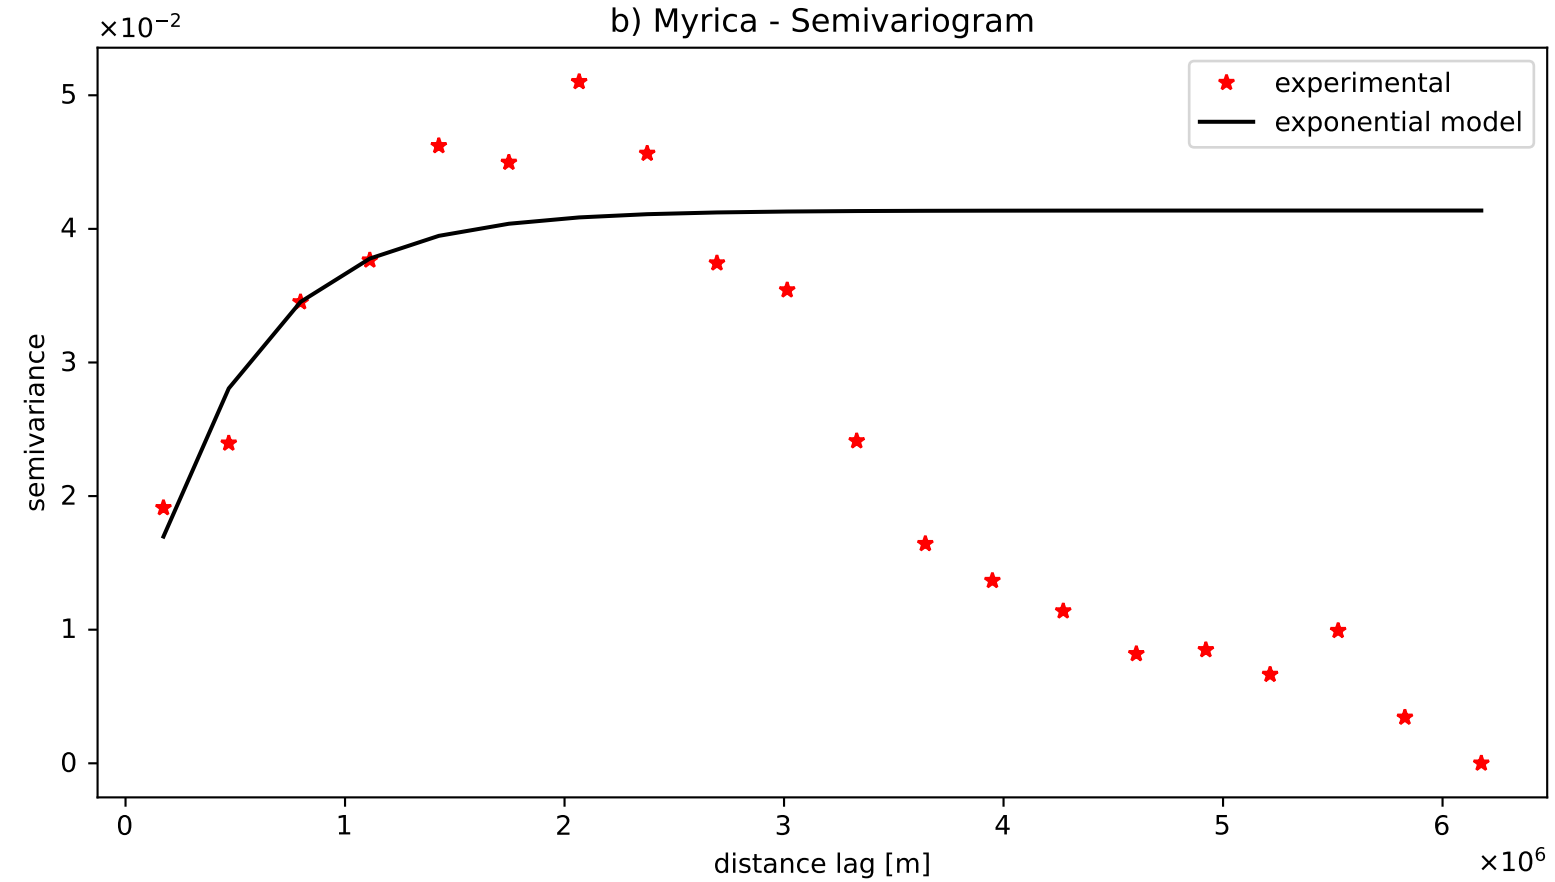

c) Myrica - Occurrence map (probability thresholds)

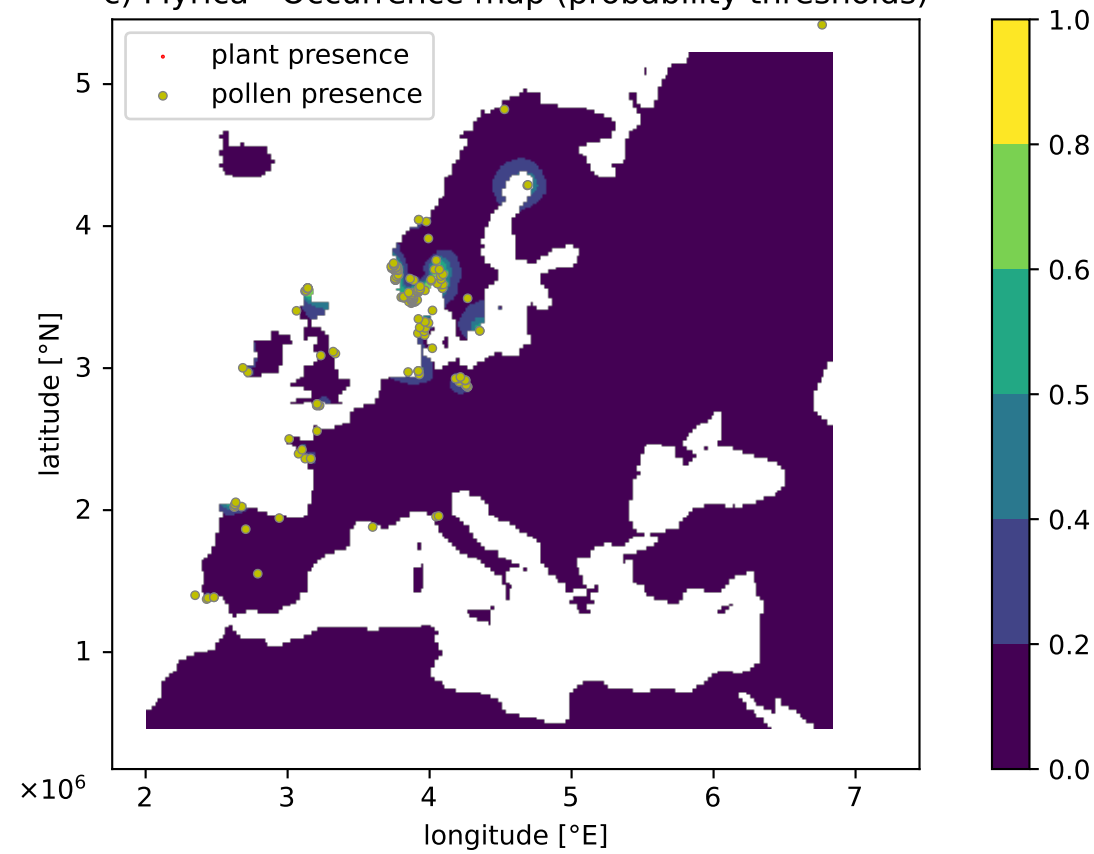

d) Myrica - Occurrence uncertainty (Kriging variance)

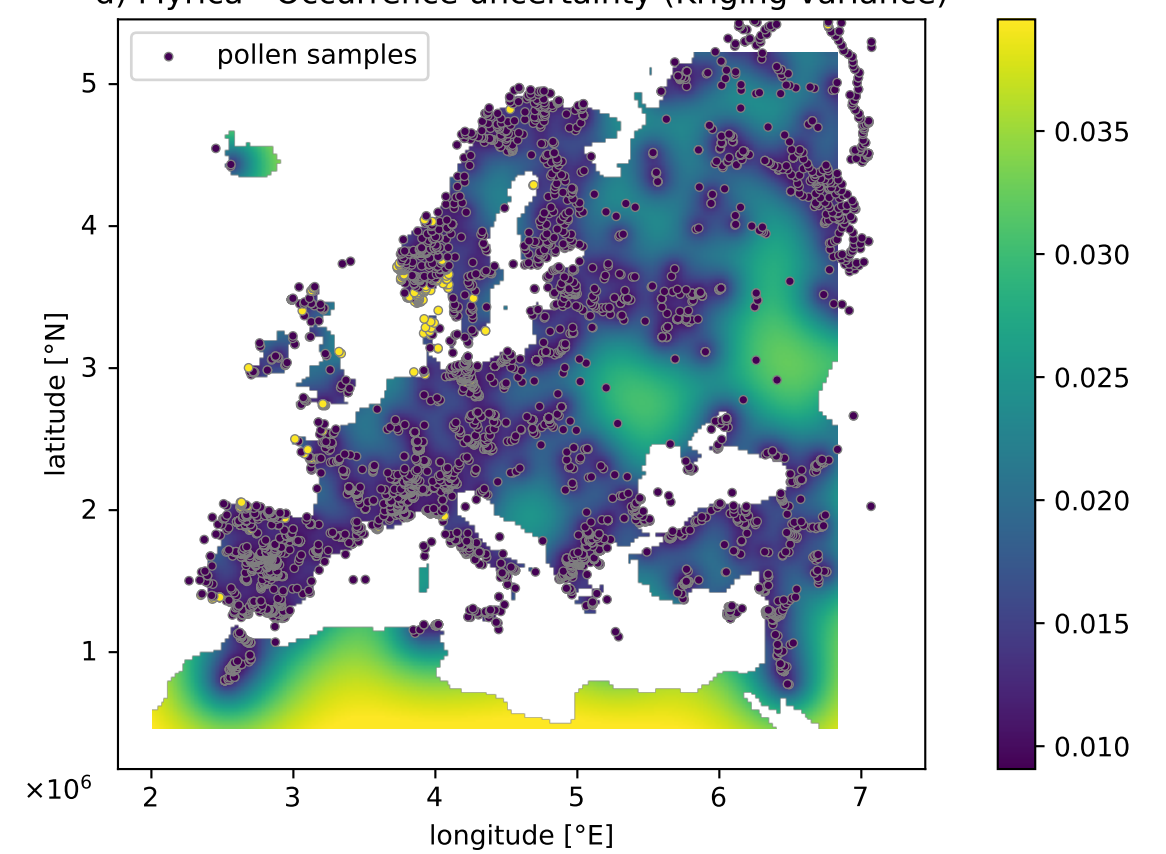

a) Universal Kriging - Myrica - Occurrence probability (Kriging mean)

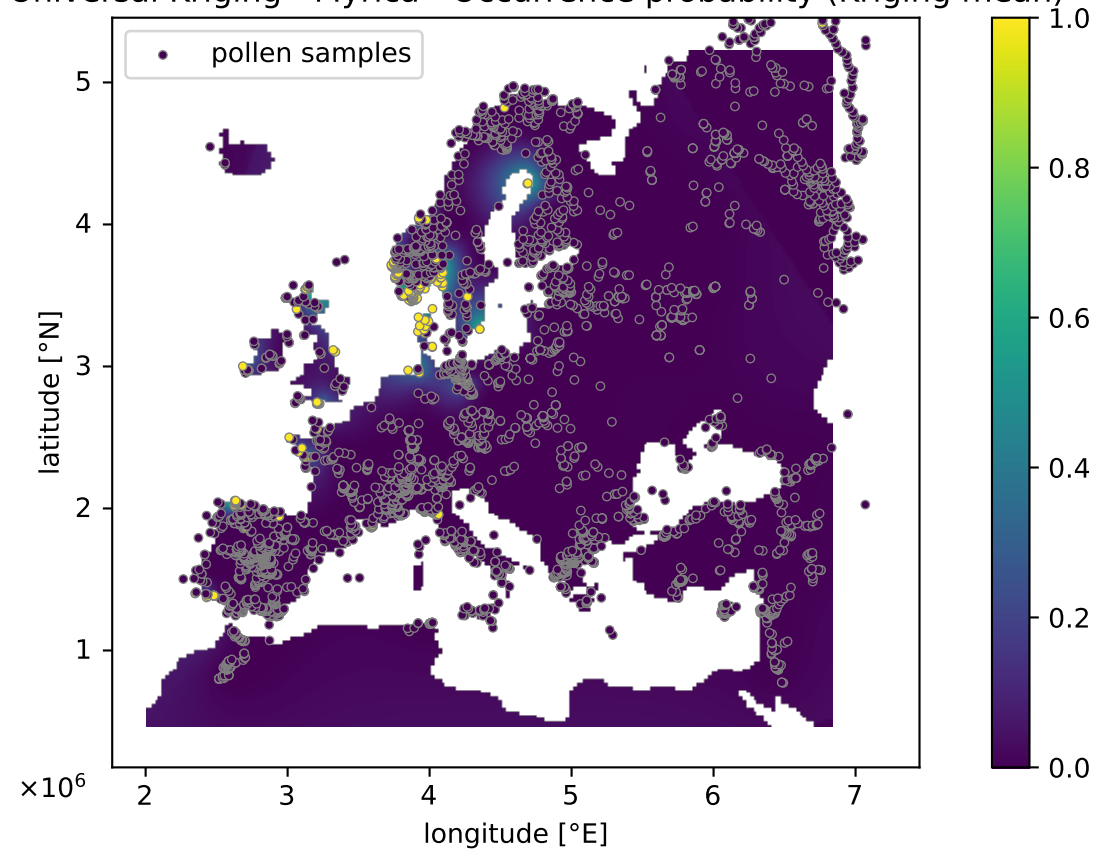

b) Myrica - Semivariogram



c) Myrica - Occurrence map (probability thresholds)

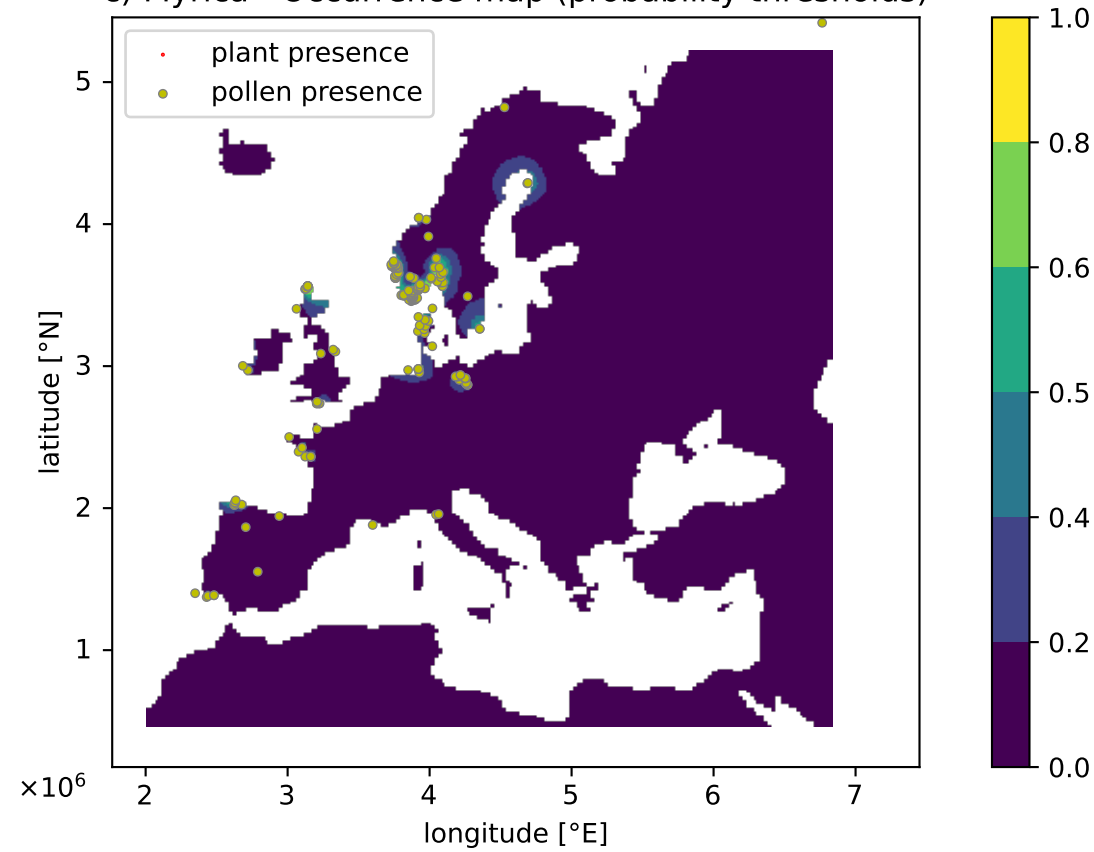

d) Myrica - Occurrence uncertainty (Kriging variance)

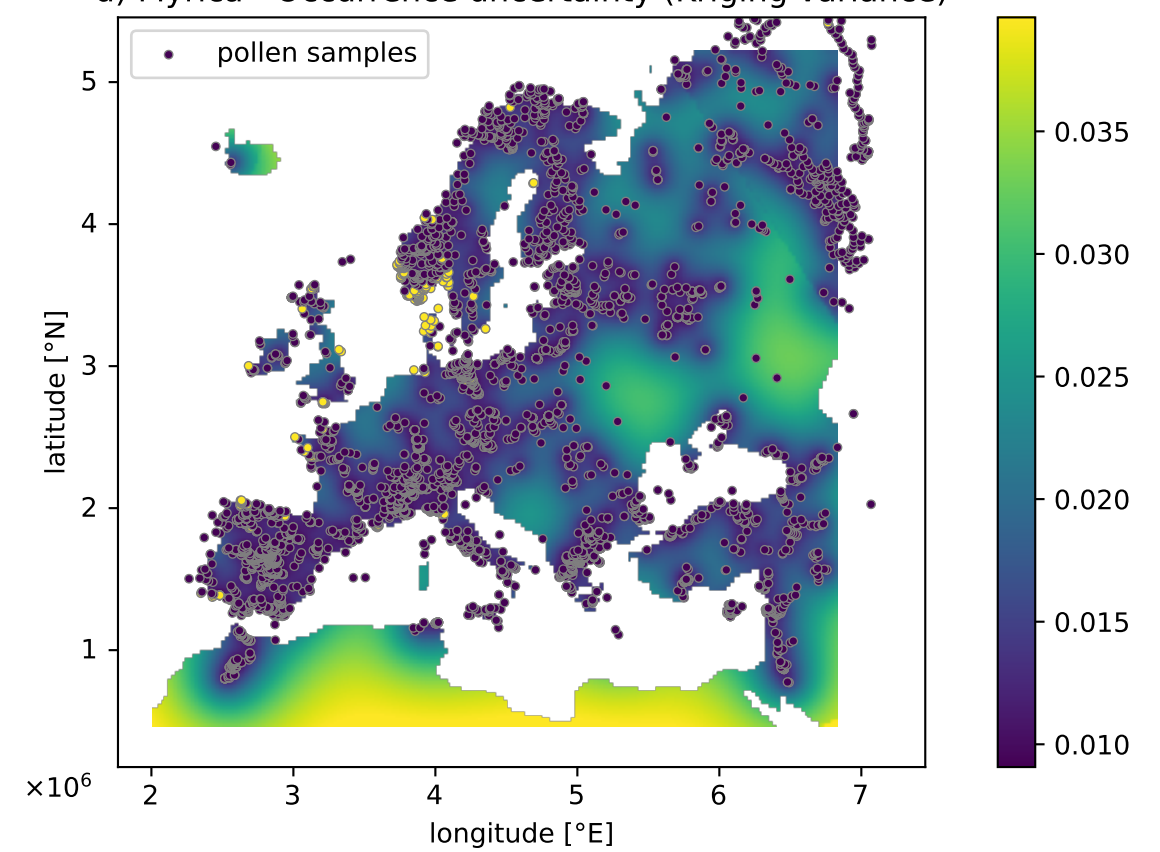

a) Ordinary Kriging - Olea - Occurrence probability (Kriging mean)

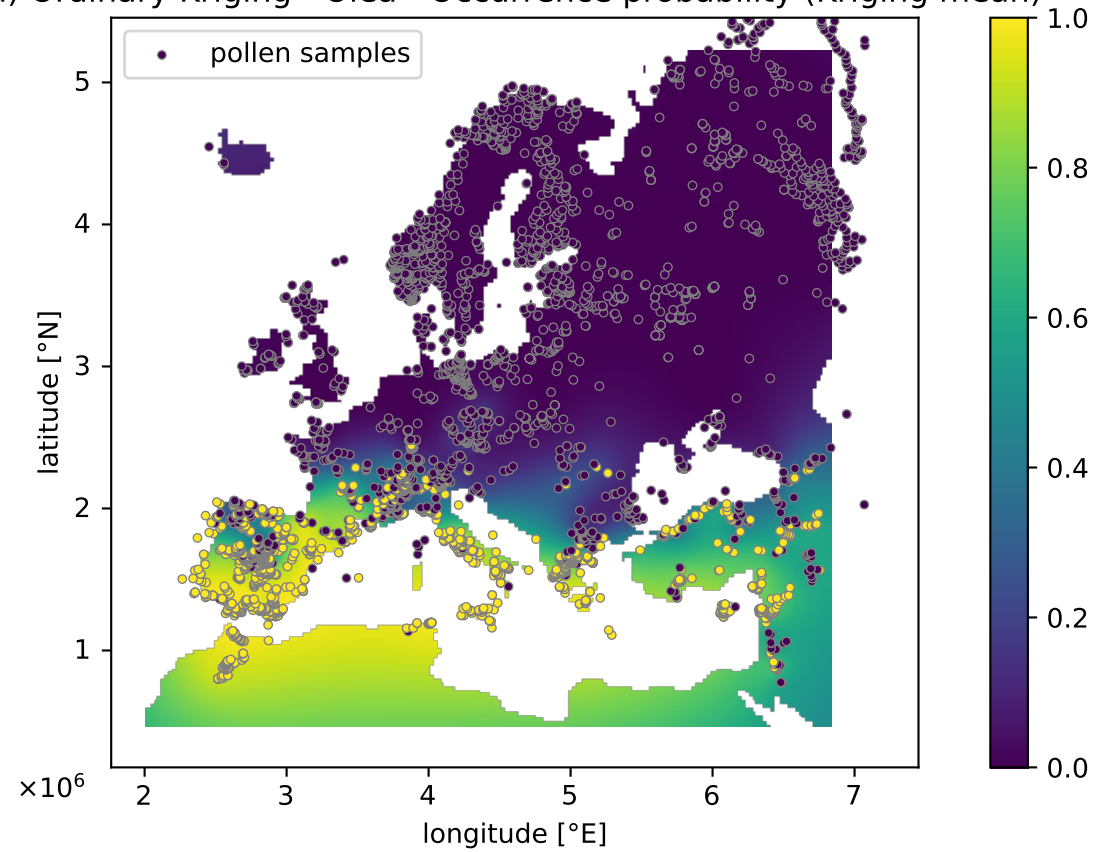

b) Olea - Semivariogram

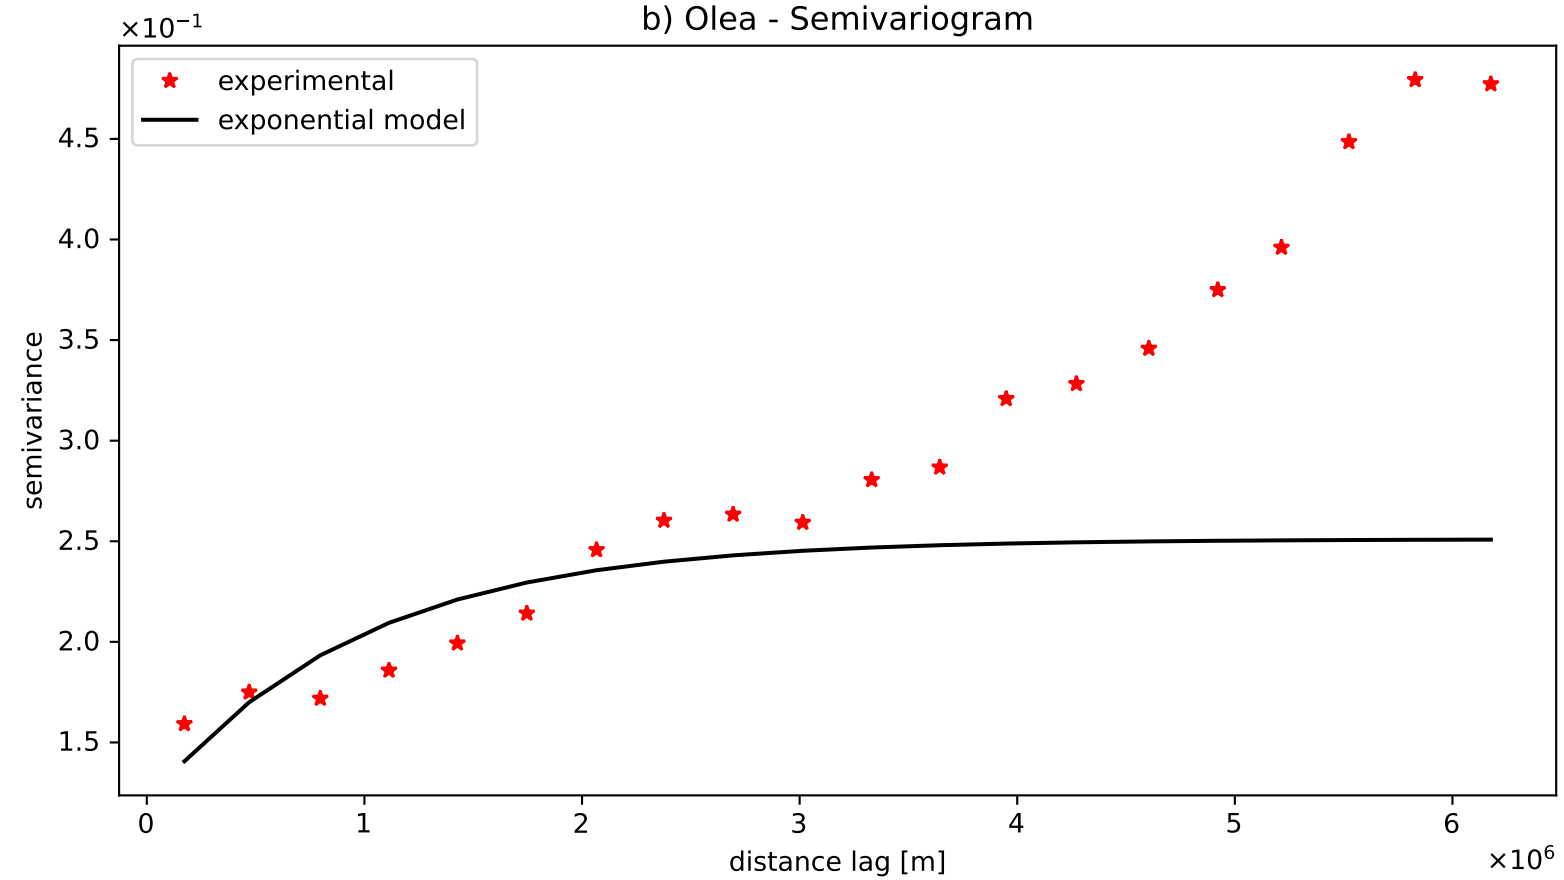

c) Olea - Occurrence map (probability thresholds)

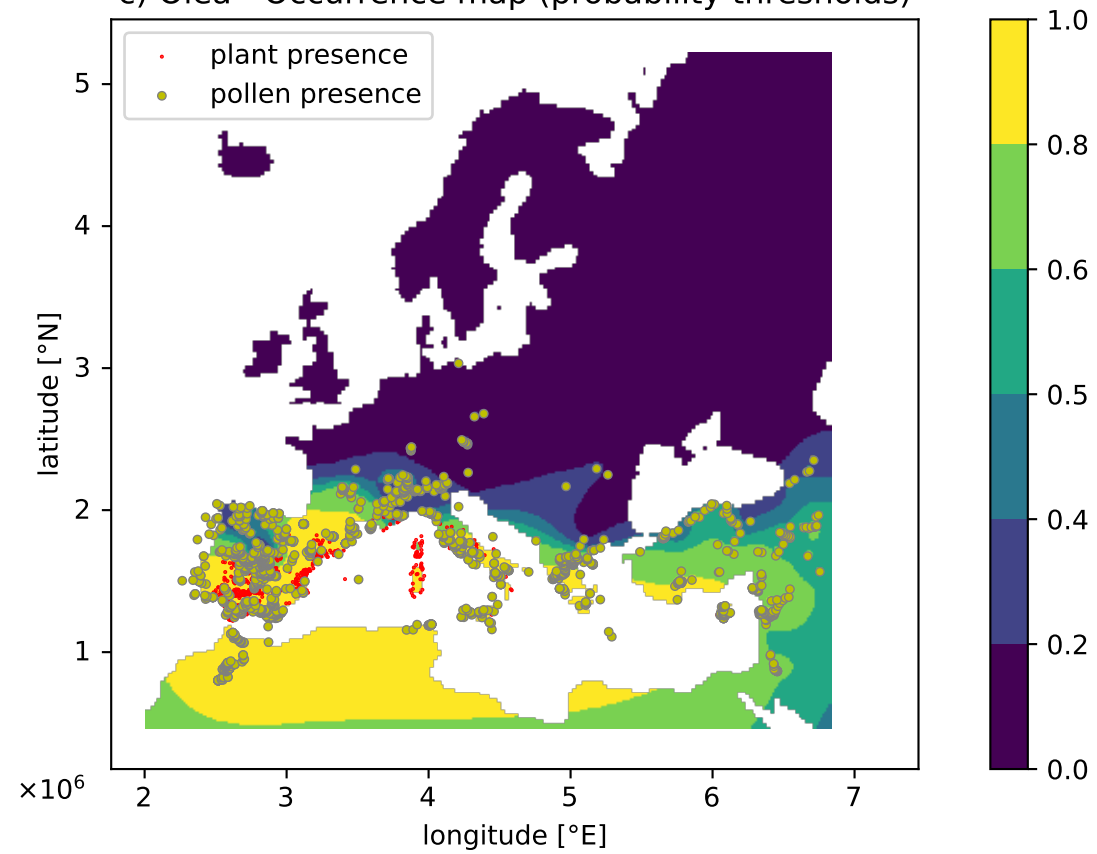

d) Olea - Occurrence uncertainty (Kriging variance)

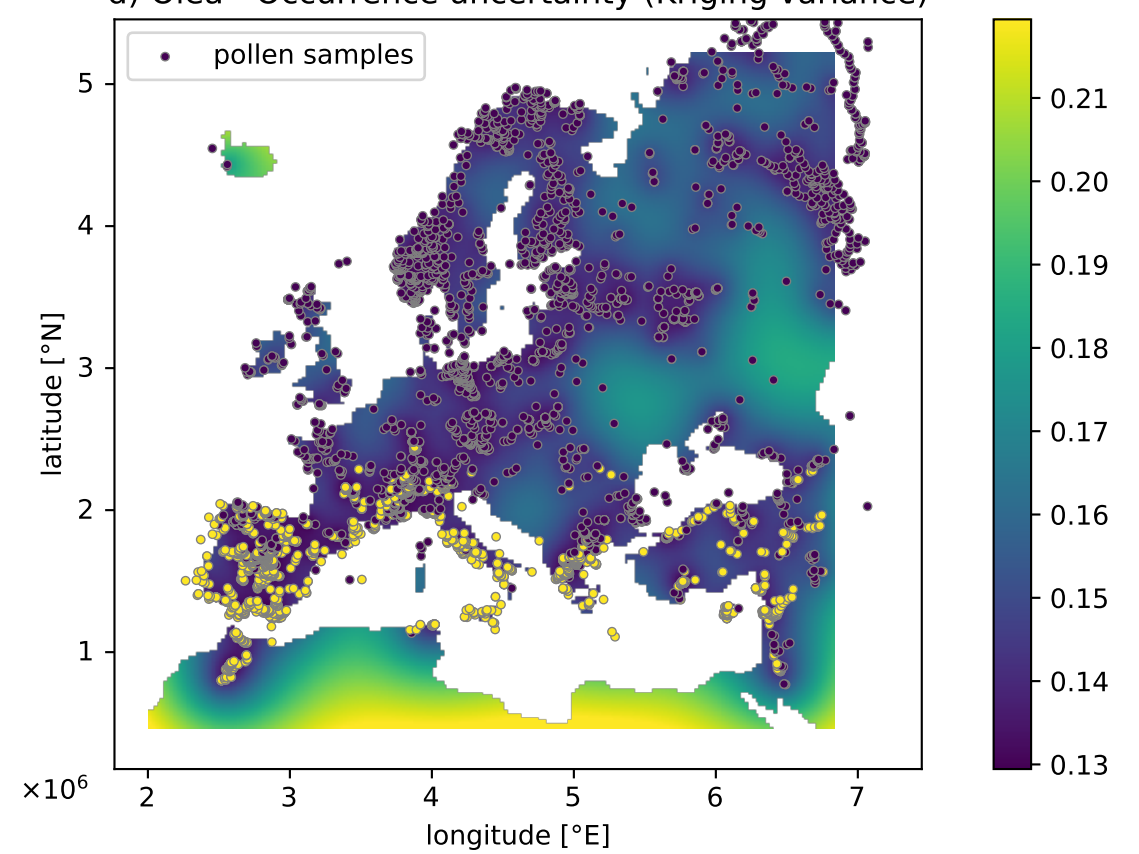



a) Universal Kriging - Olea - Occurrence probability (Kriging mean)

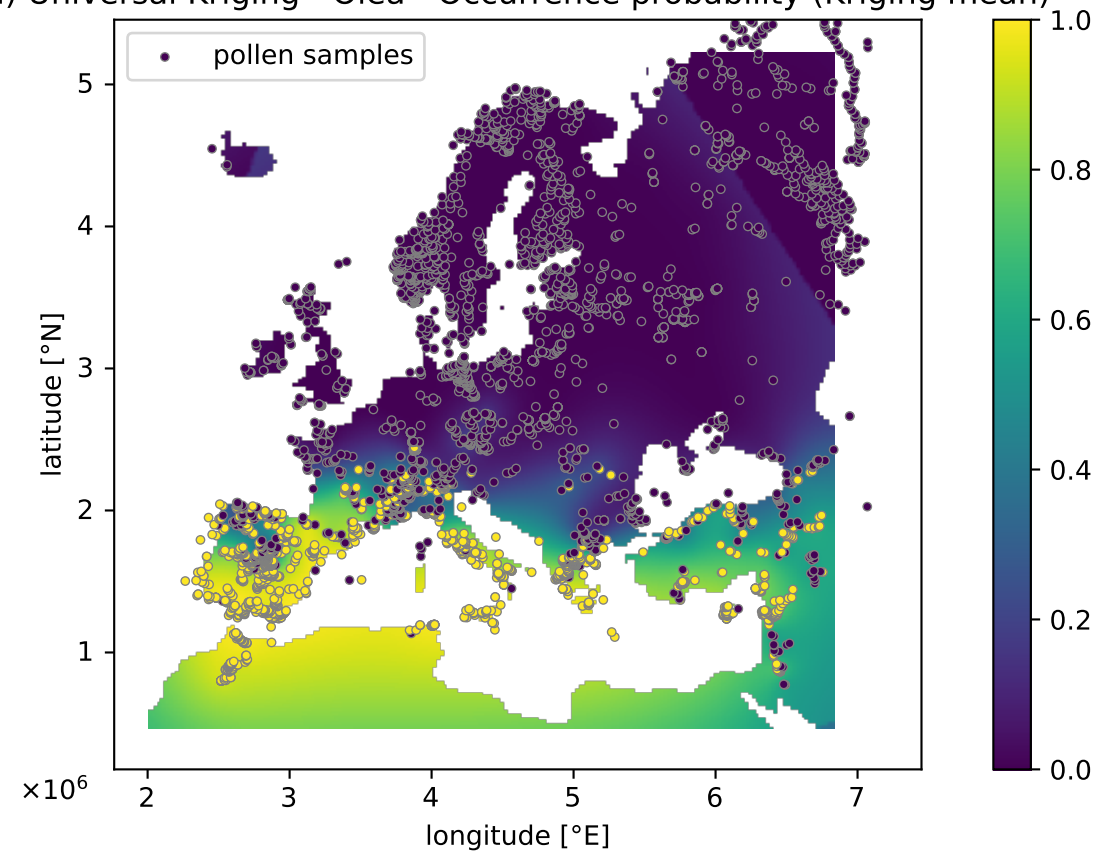

b) Olea - Semivariogram

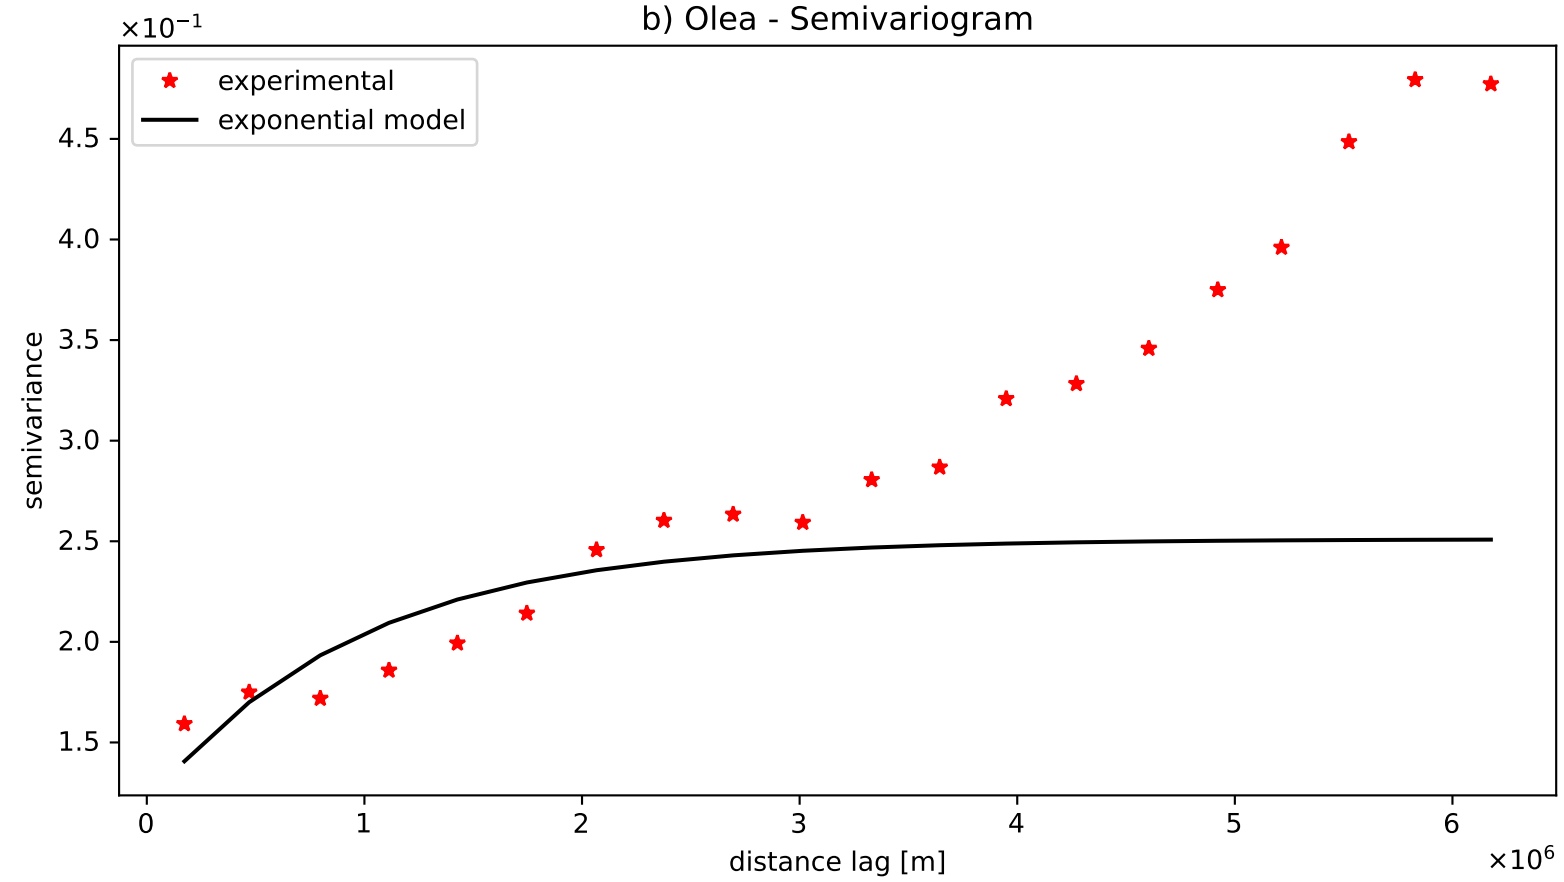

c) Olea - Occurrence map (probability thresholds)

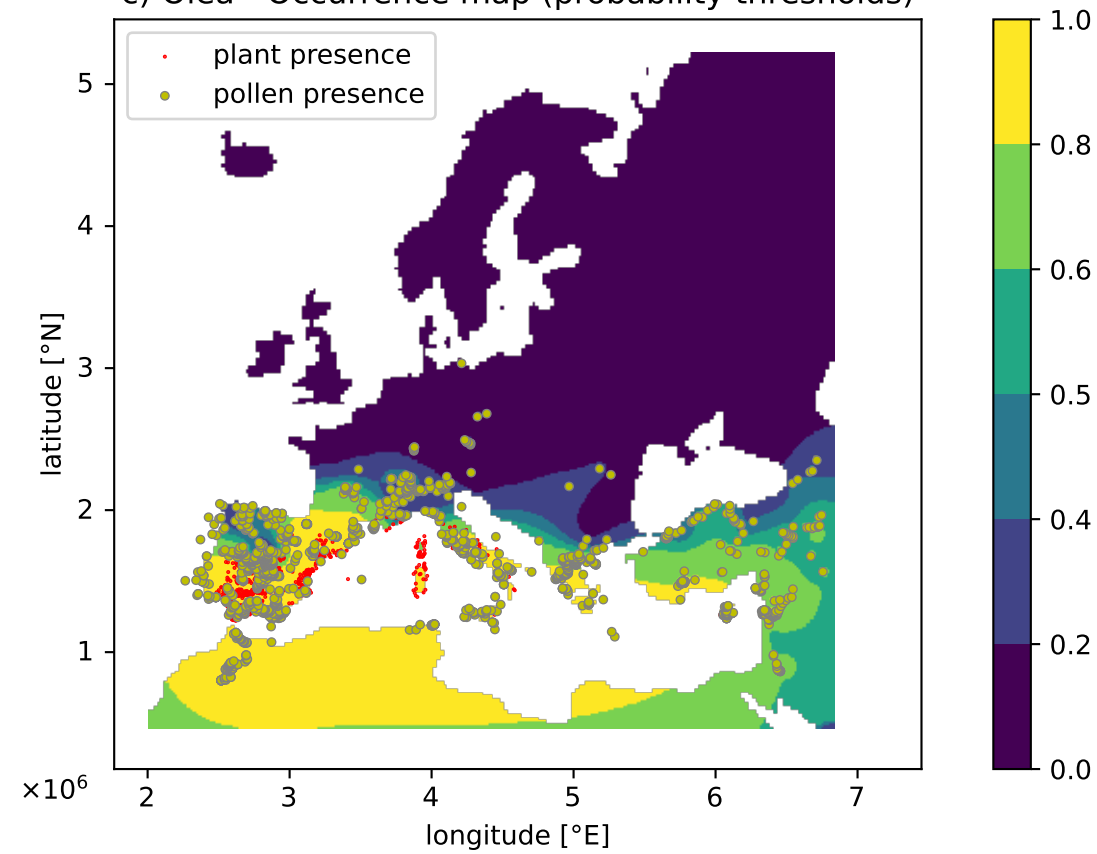

d) Olea - Occurrence uncertainty (Kriging variance)

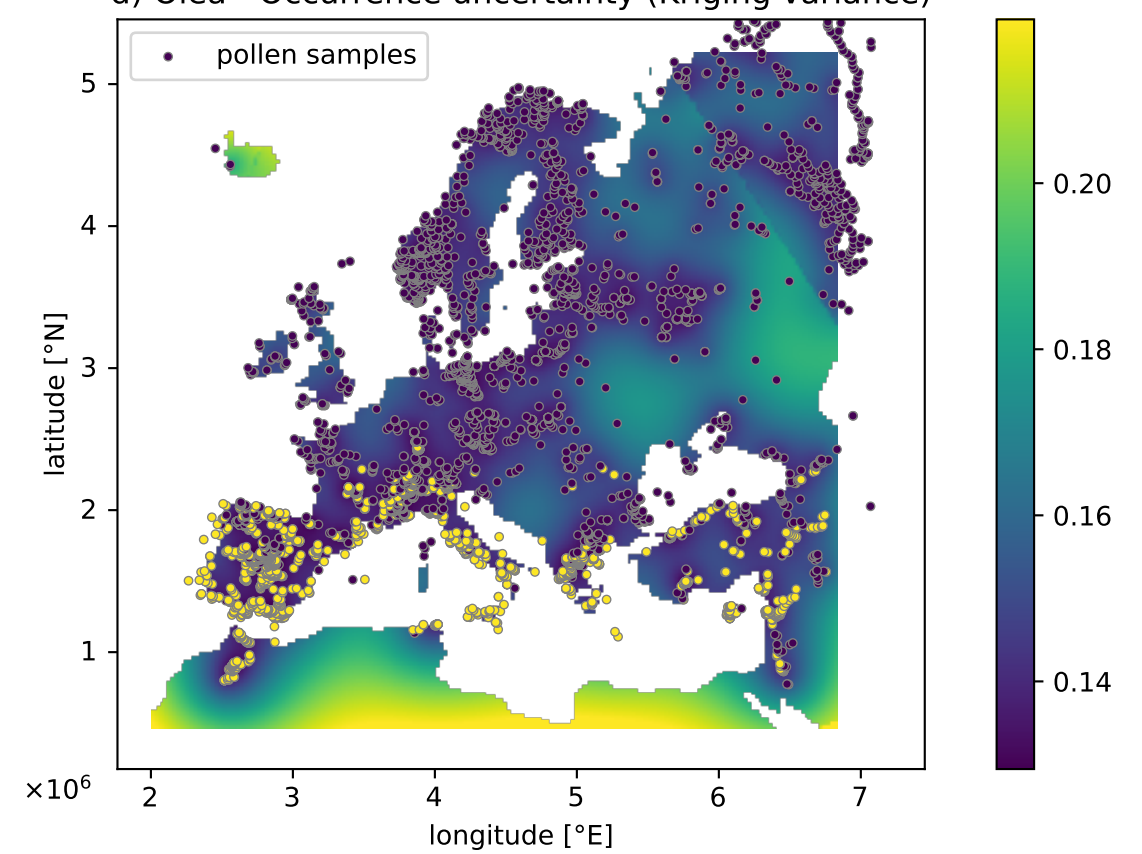

a) Ordinary Kriging - Quercus - Occurrence probability (Kriging mean)

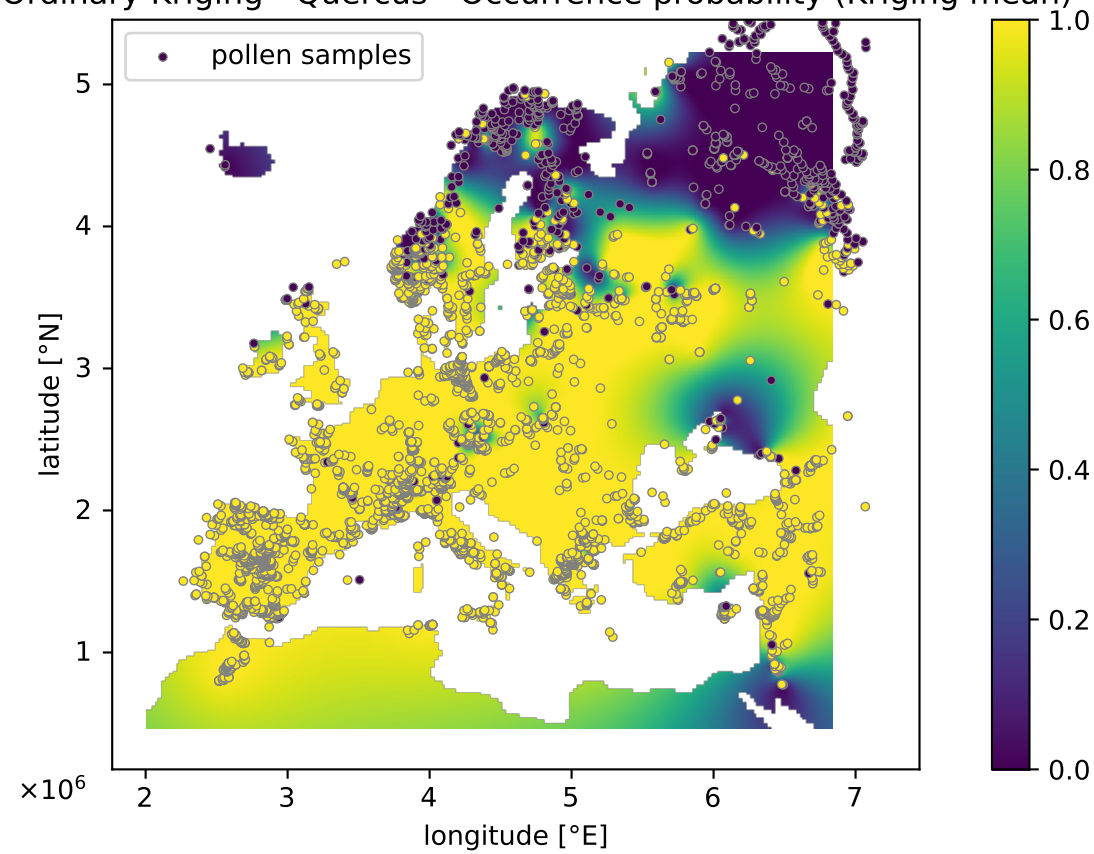

b) Quercus - Semivariogram

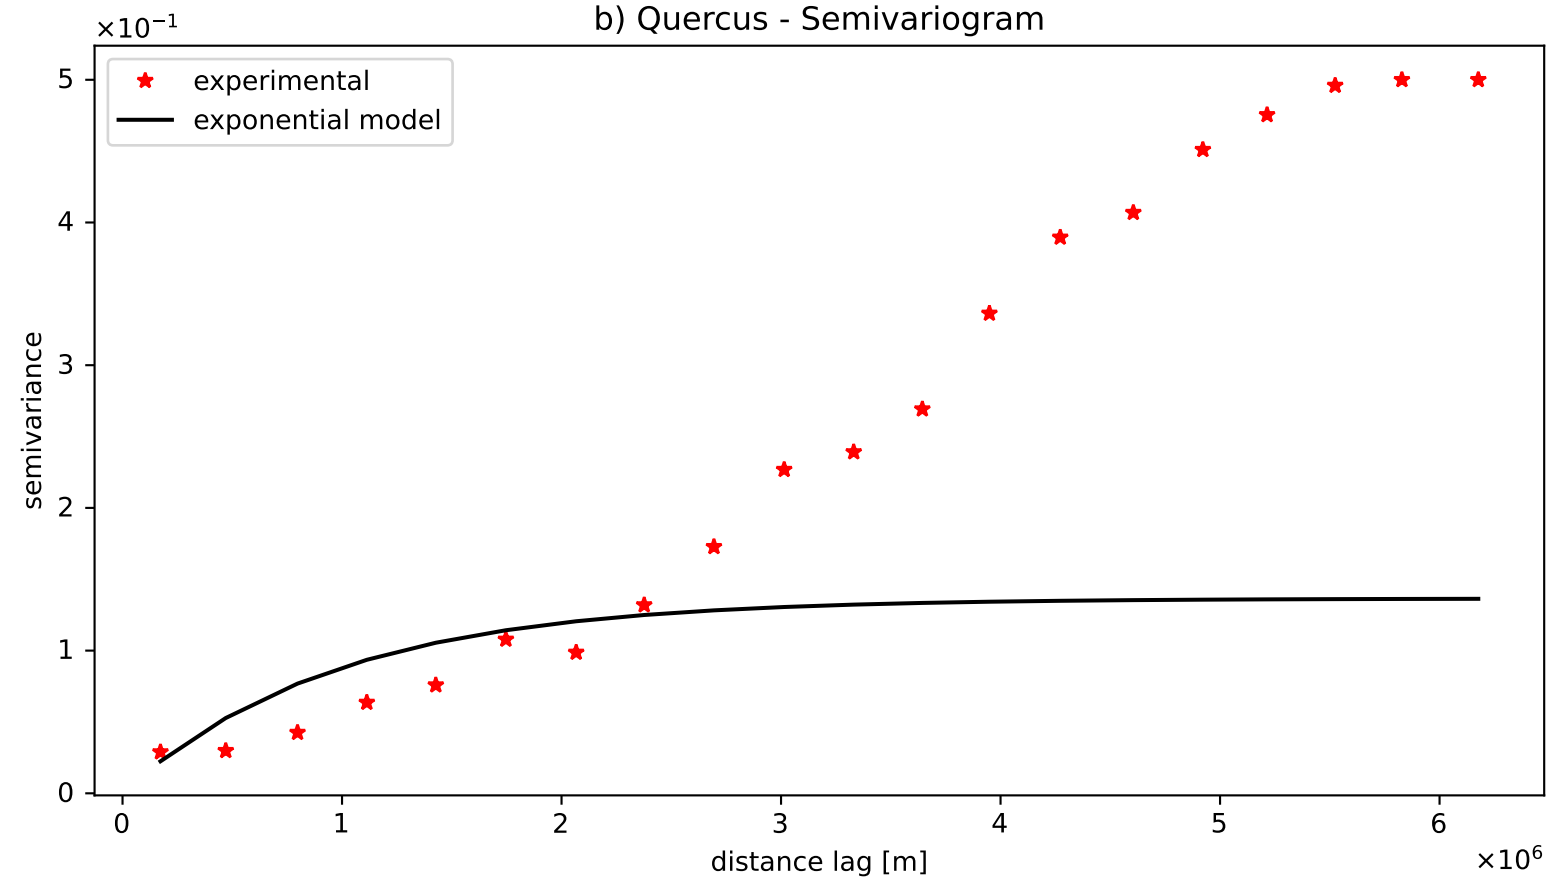

c) Quercus - Occurrence map (probability thresholds)

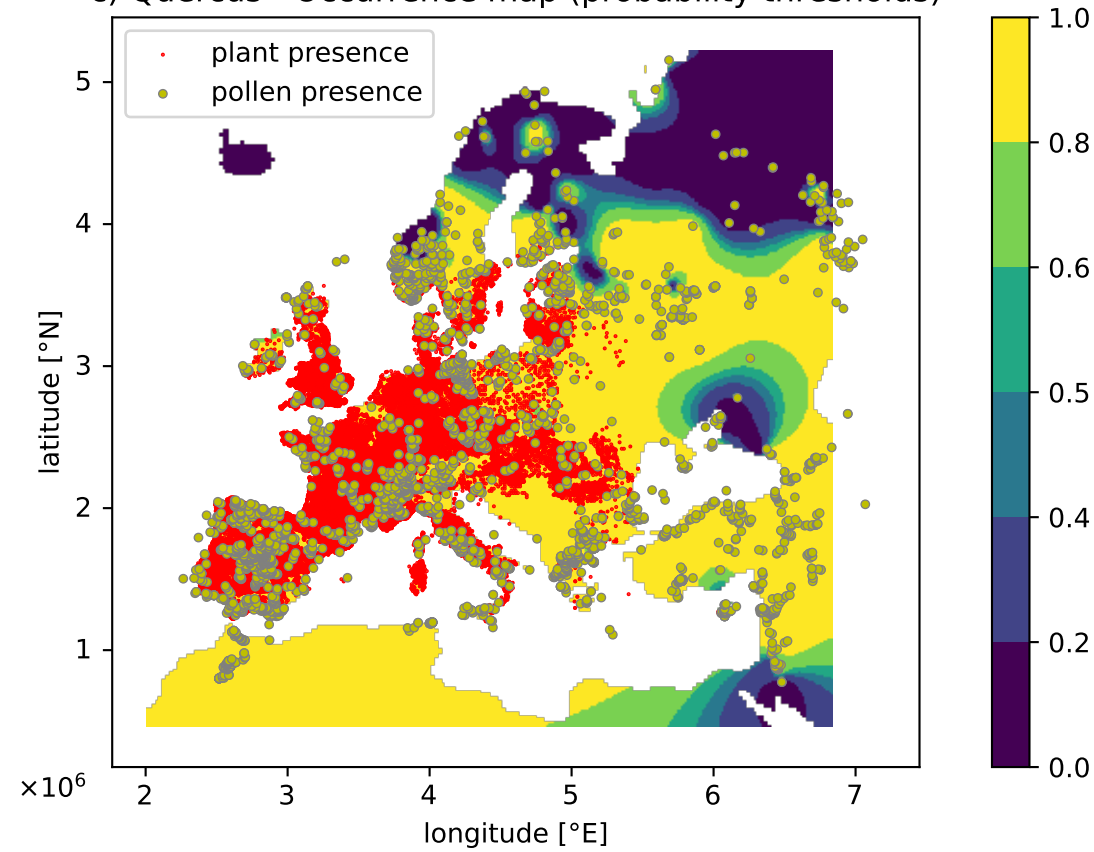

d) Quercus - Occurrence uncertainty (Kriging variance)

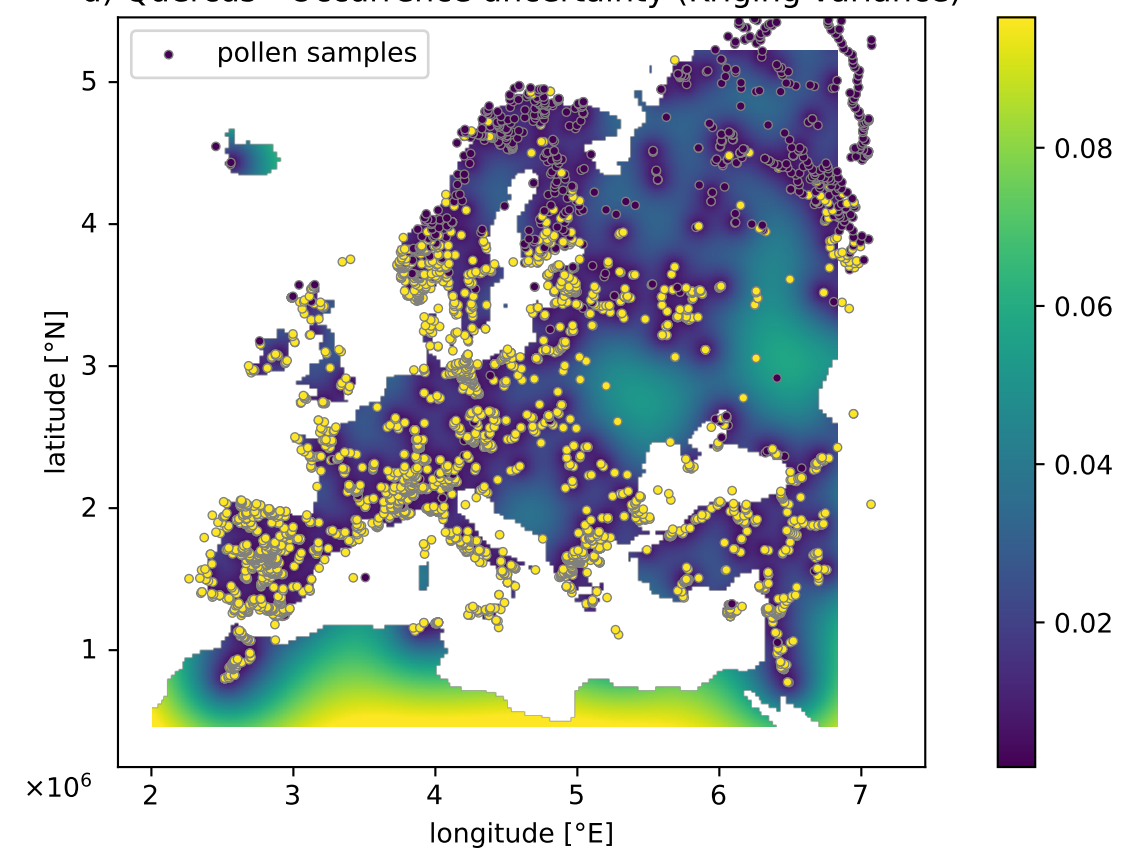

a) Universal Kriging - Quercus - Occurrence probability (Kriging mean)

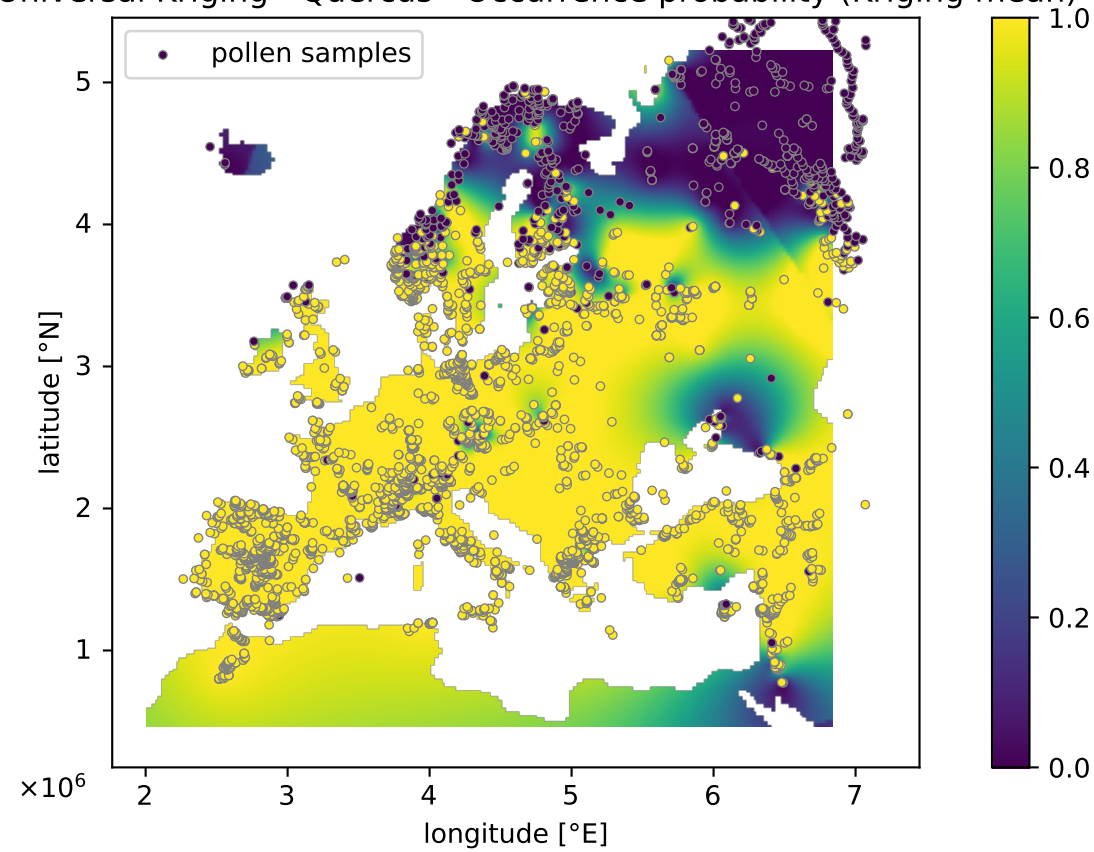

b) Quercus - Semivariogram



c) Quercus - Occurrence map (probability thresholds)

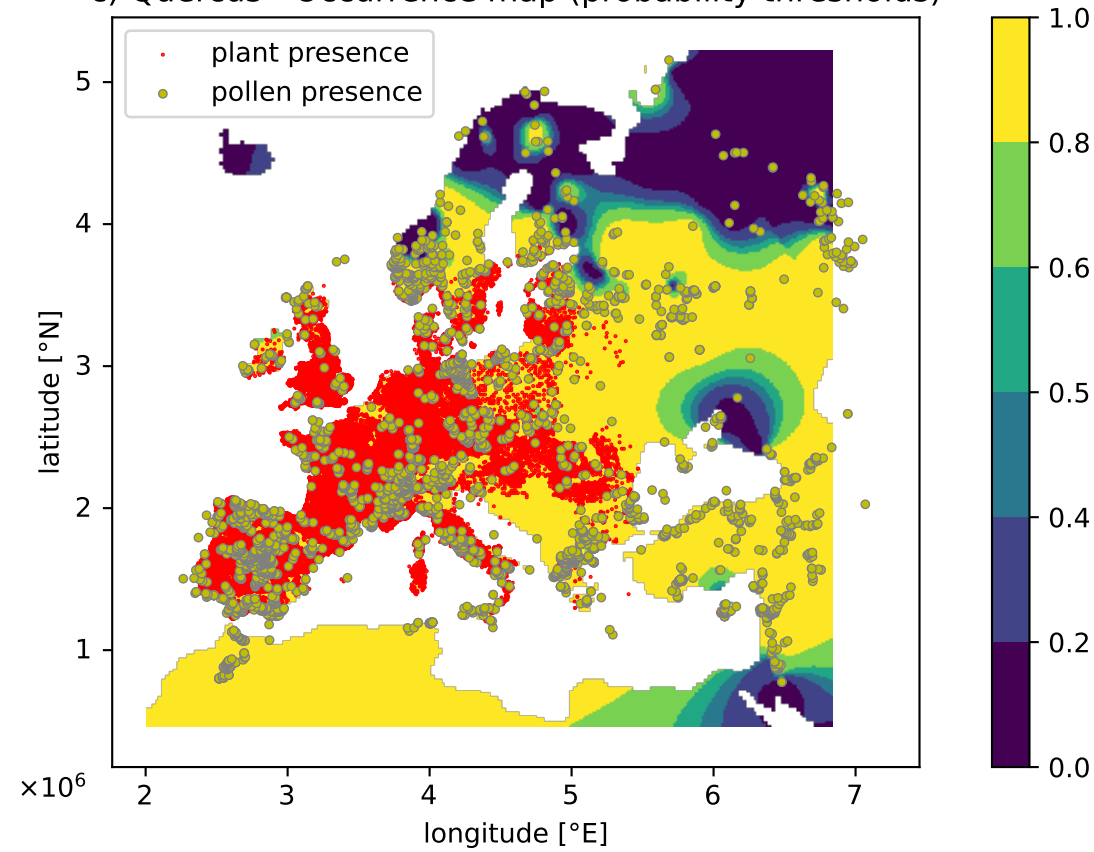

d) Quercus - Occurrence uncertainty (Kriging variance)

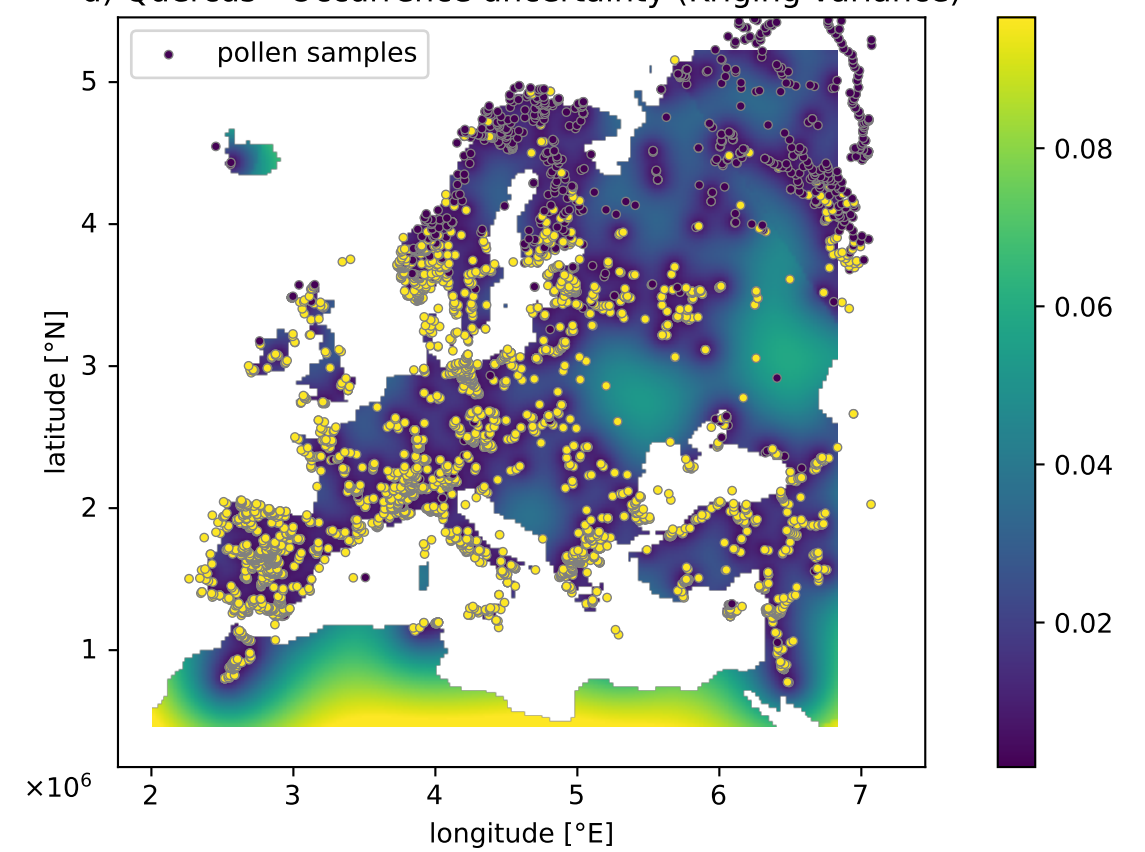

Supplement: Supplementary file 1 [file essd-16-731-2024-supplement.zip]
