# Supplementary material for: EUPollMap: the European atlas of contemporary pollen distribution maps derived from an integrated Kriging interpolation approach
Source: Copernicus journal article supplement (doi:10.5194/essd-16-731-2024), 2024-01-31

Oriani et al., EUPollMap: The European atlas of contemporary pollen distribution maps derived from an integrated Kriging interpolation approach – **Supplemental material 2 : Examples of pollen maps from the EUPollMap dataset with the associated semivariogram model**

a) Abies - Occurrence probability (Kriging mean)

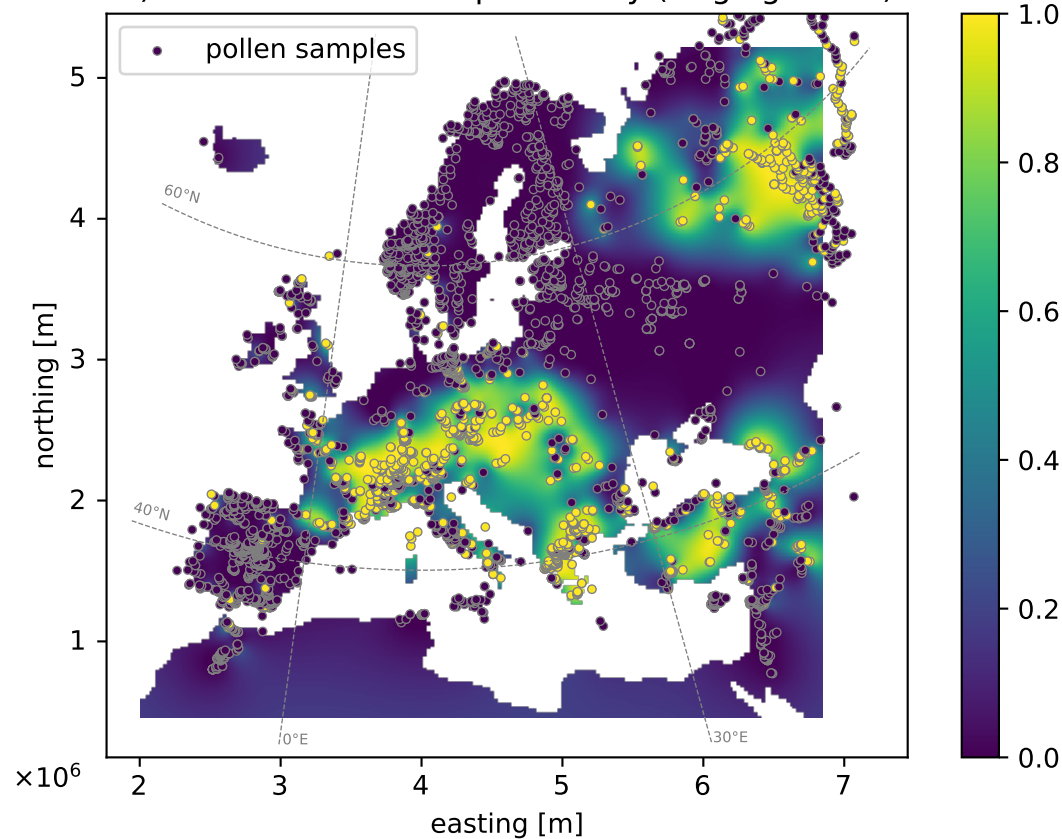

b) Abies - Semivariogram

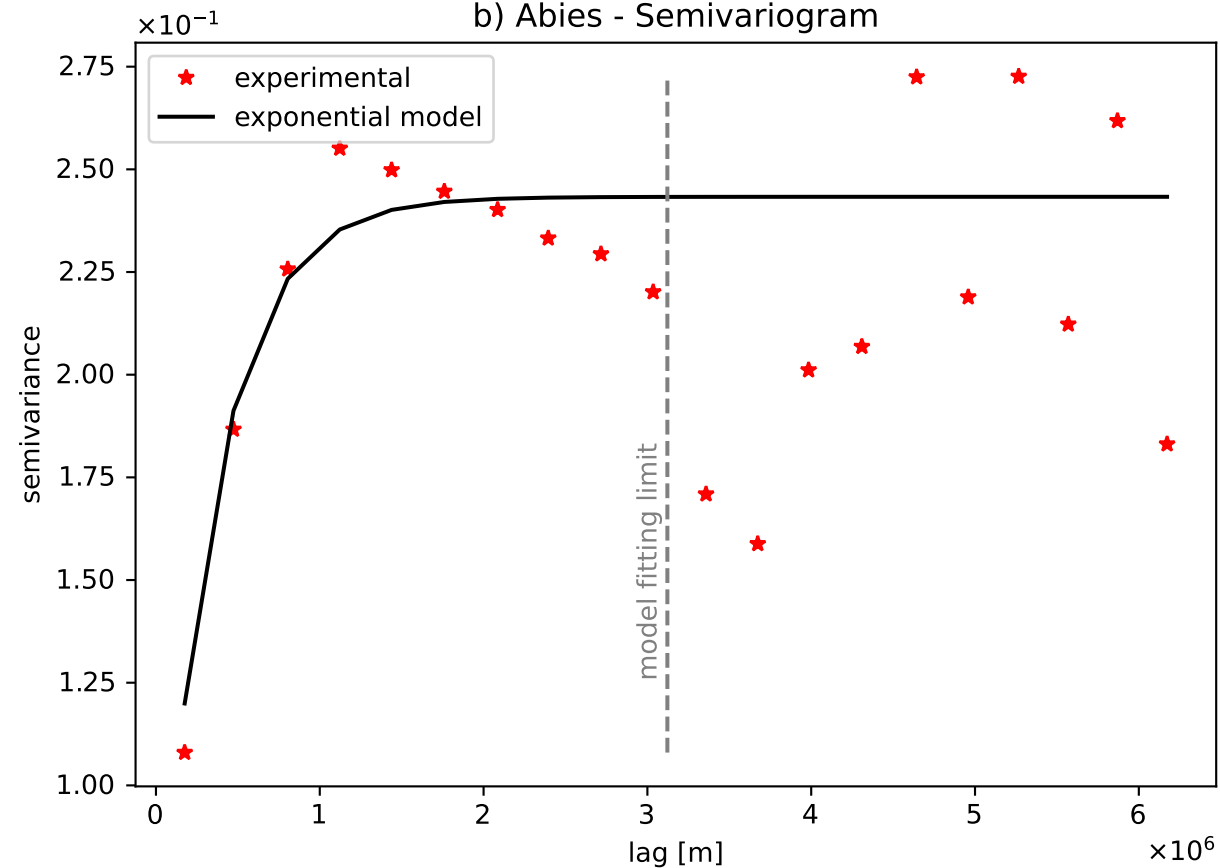

c) Abies - Occurrence map (probability thresholds)

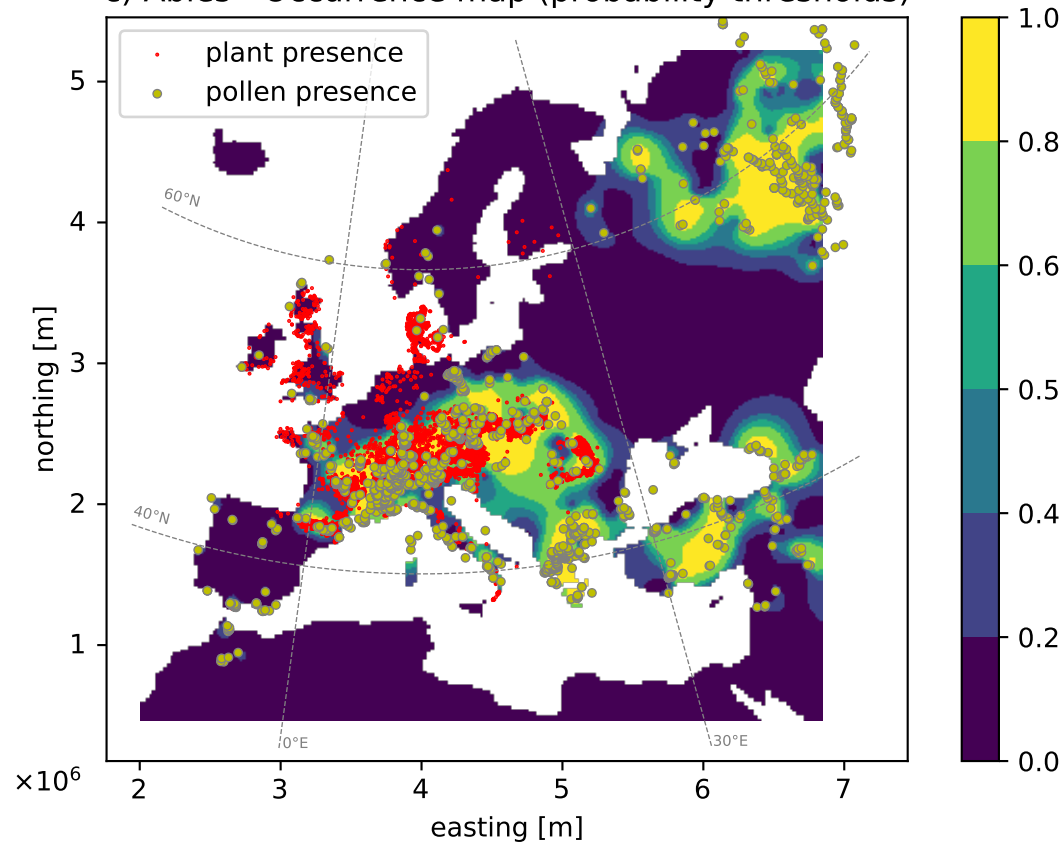

d) Abies - Occurrence uncertainty (Kriging variance)

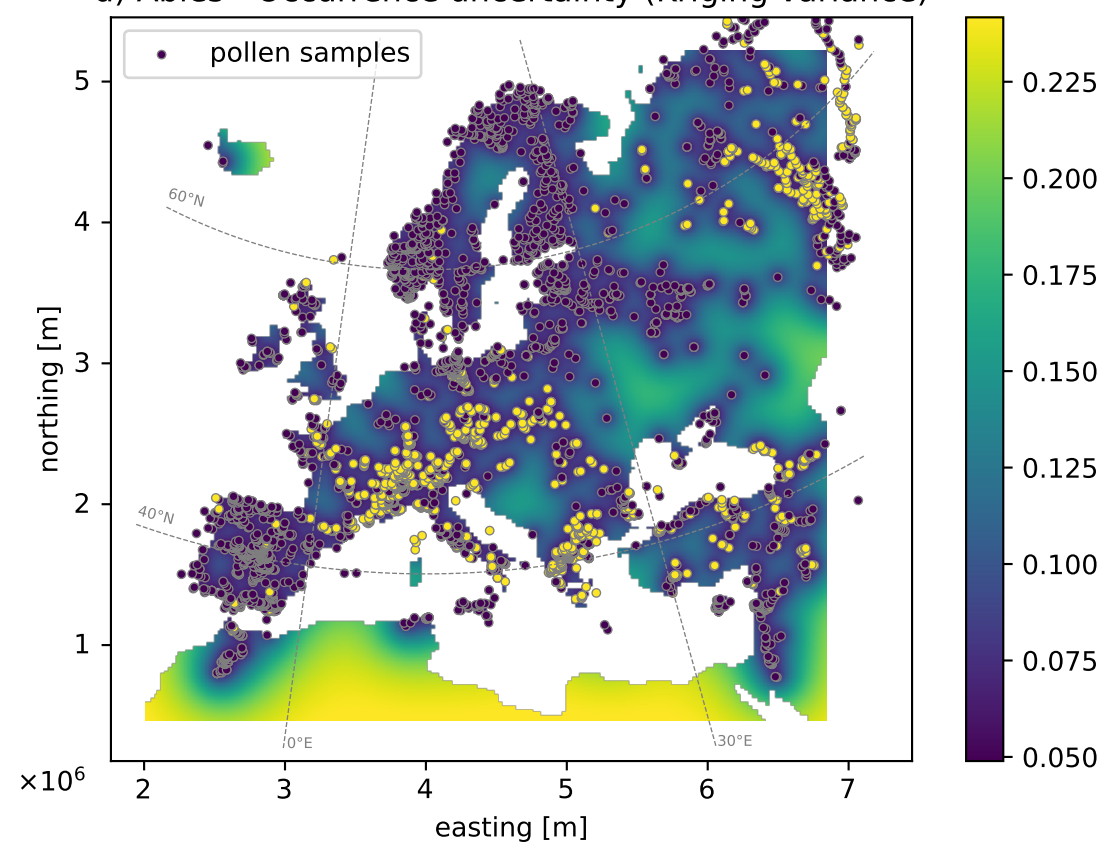

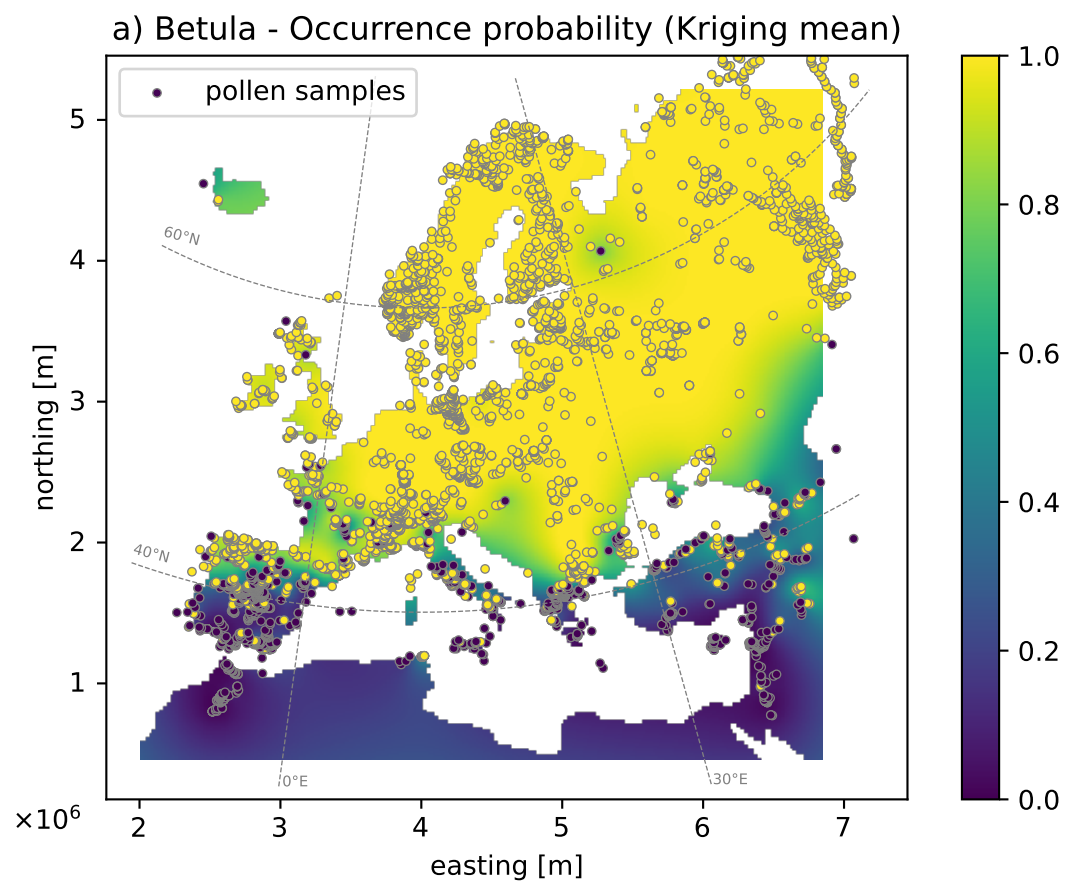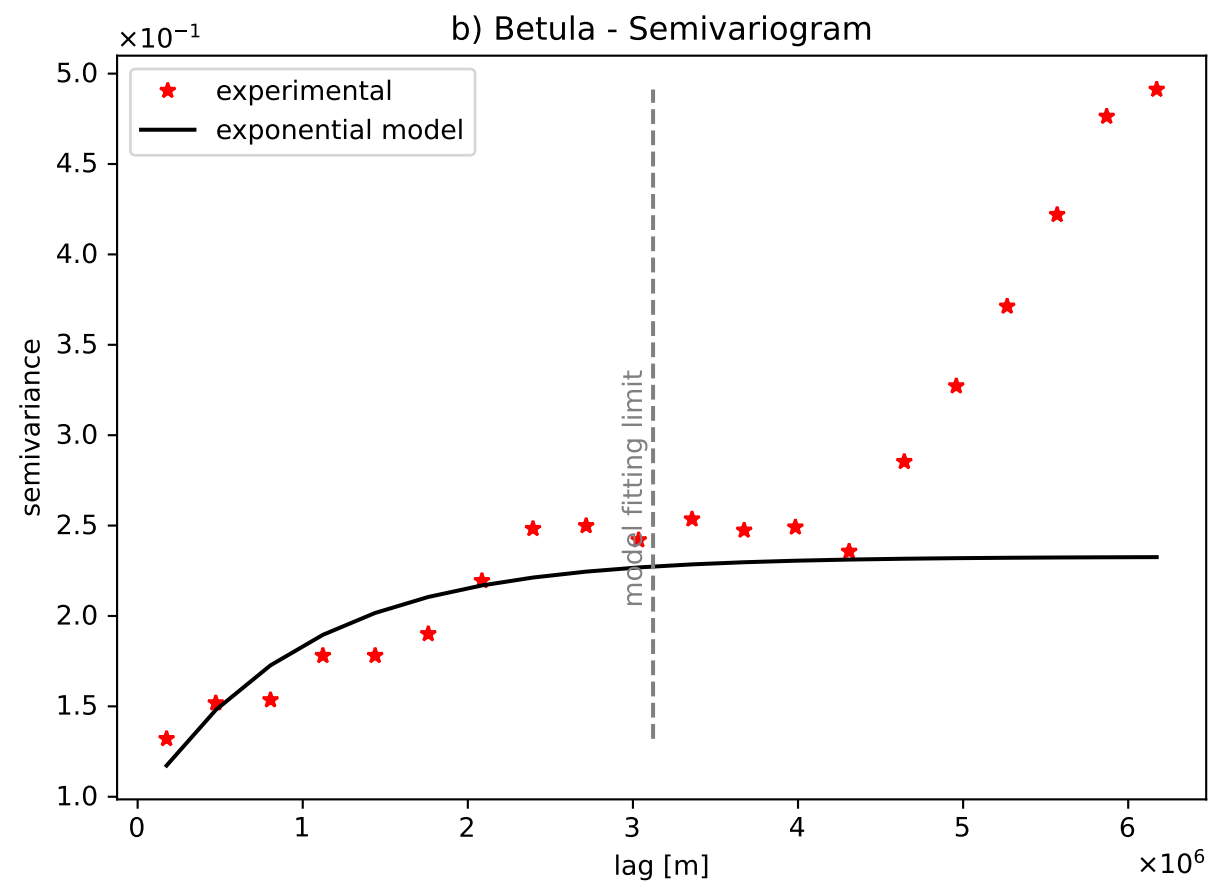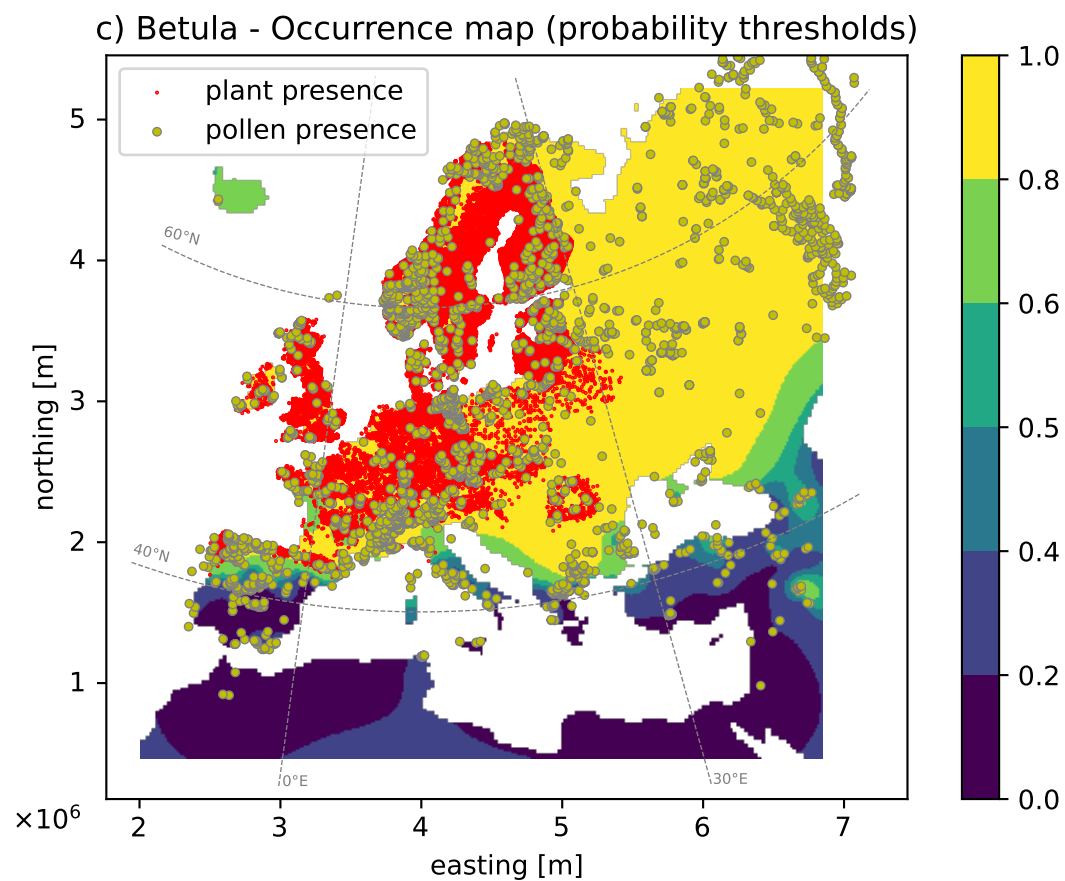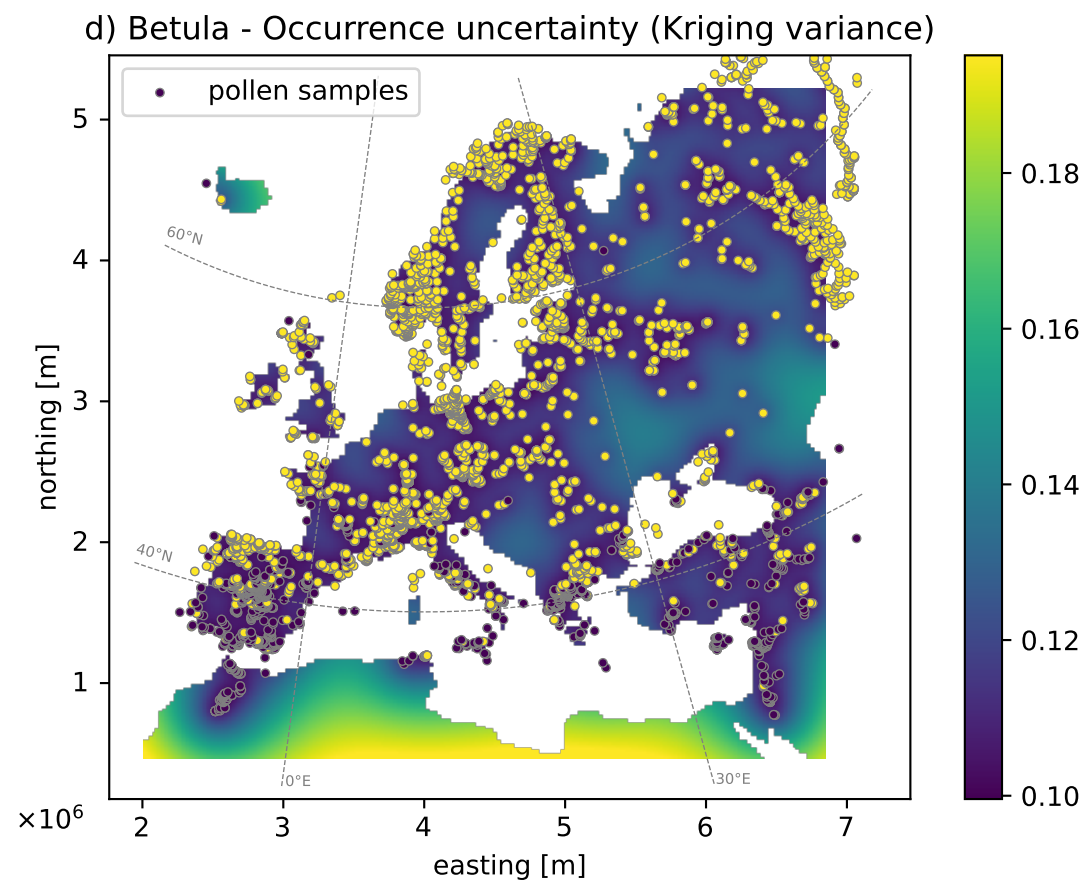

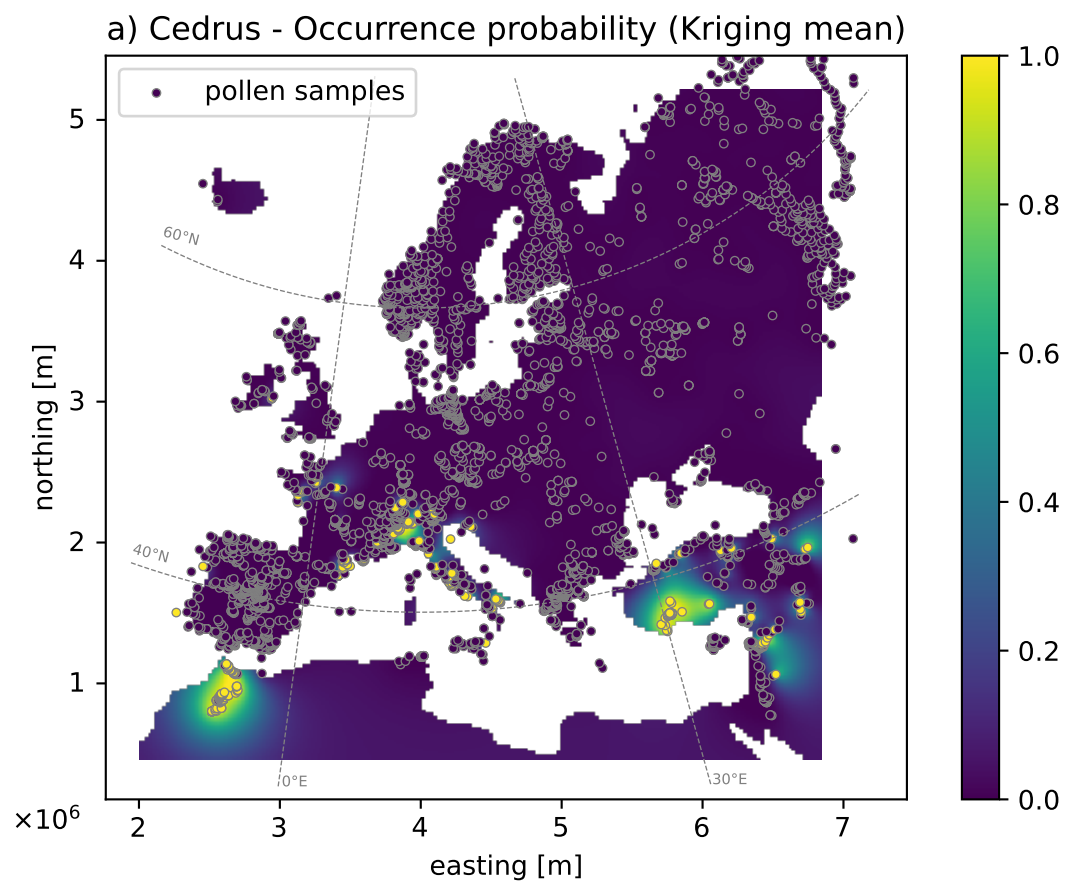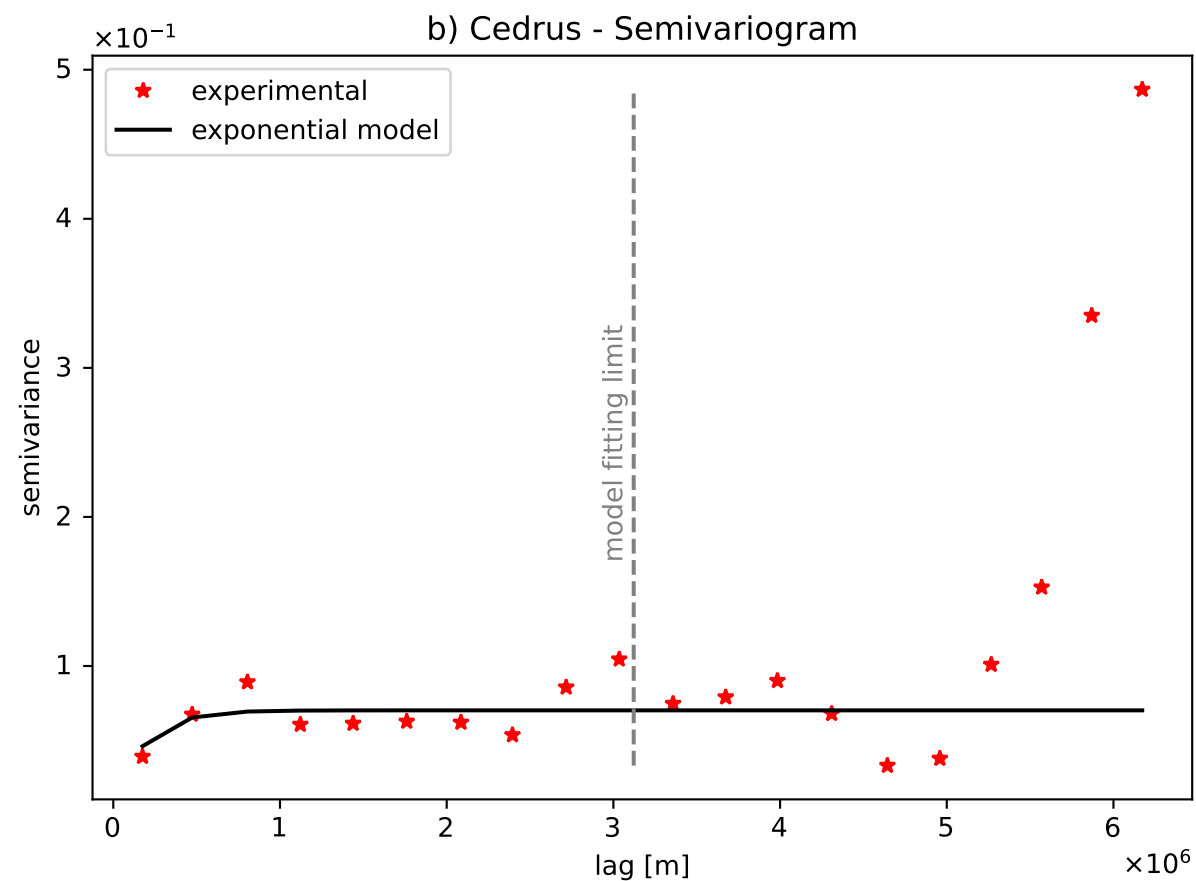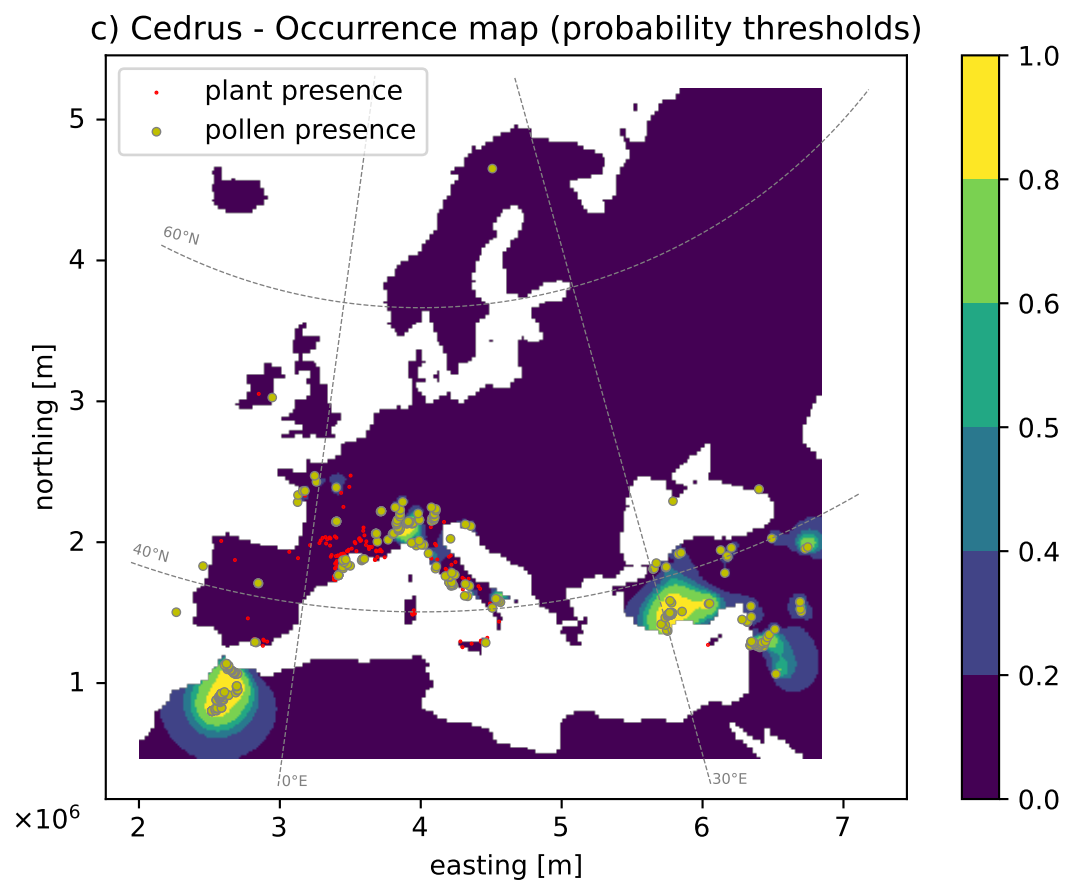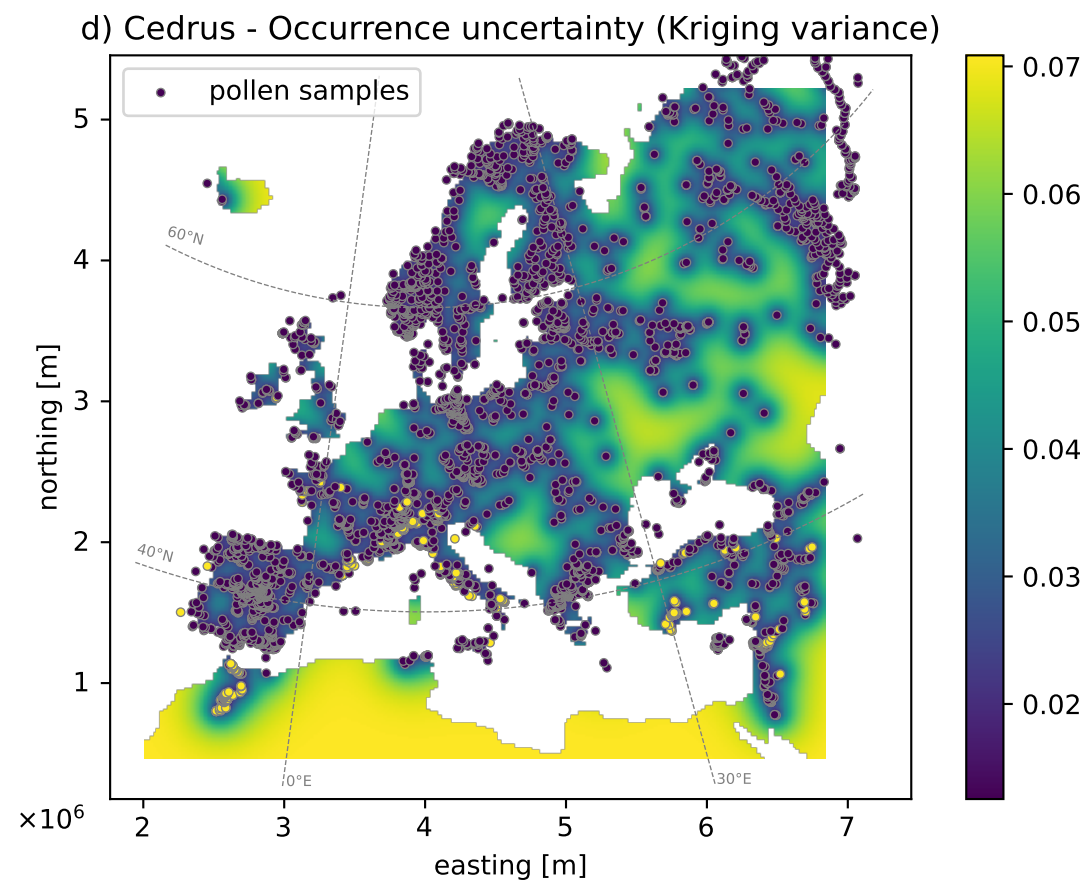



a) *Corylus* - Occurrence probability (Kriging mean)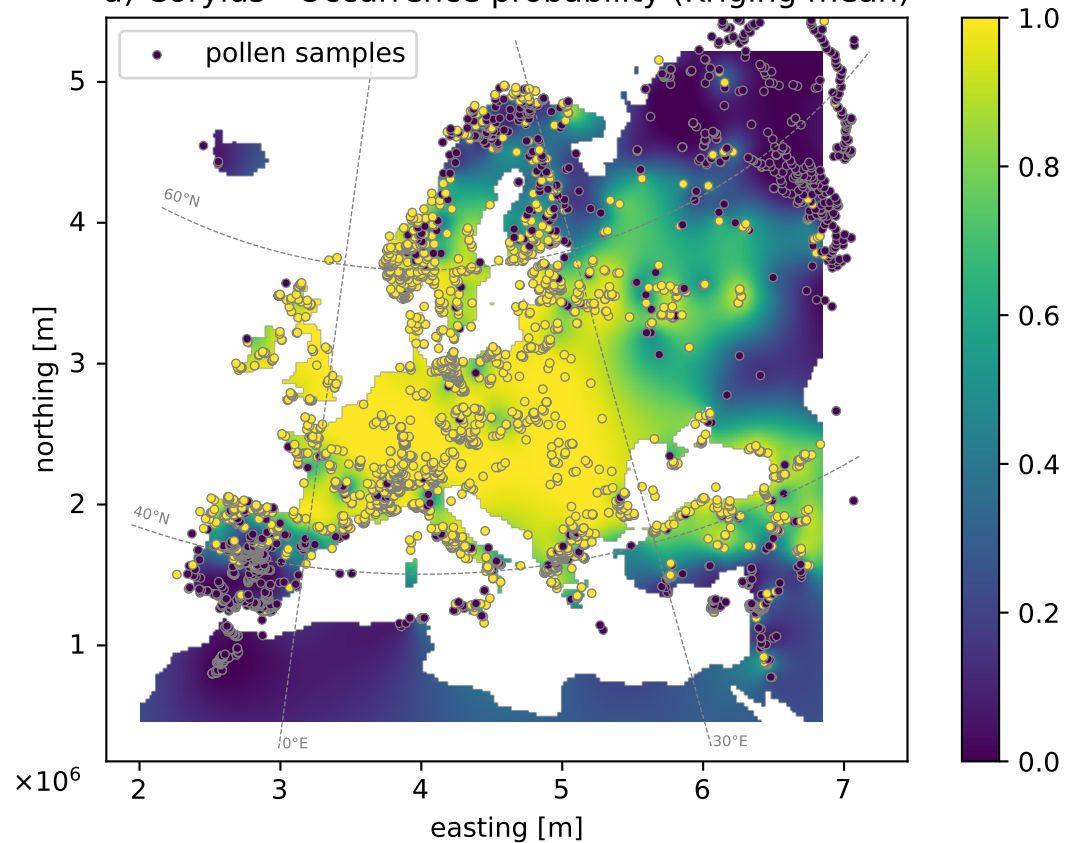b) *Corylus* - Semivariogram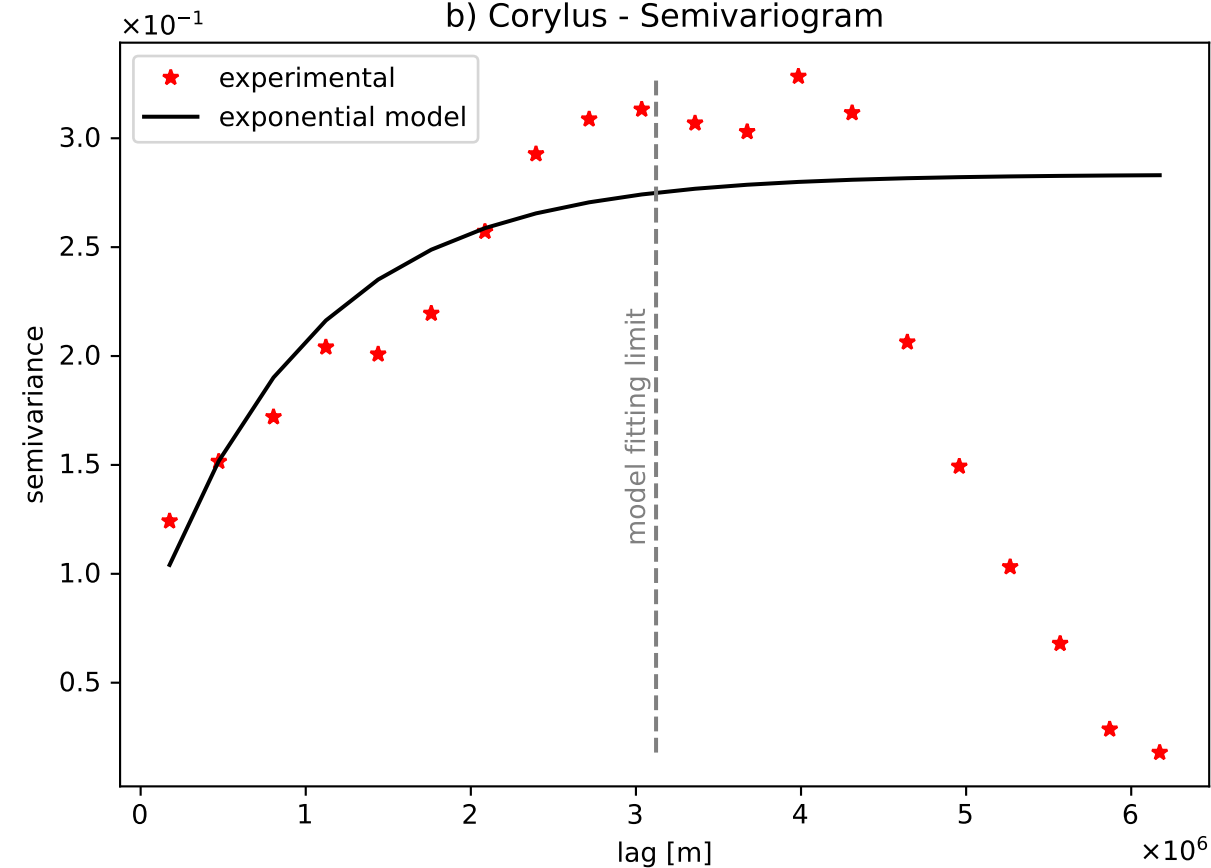c) *Corylus* - Occurrence map (probability thresholds)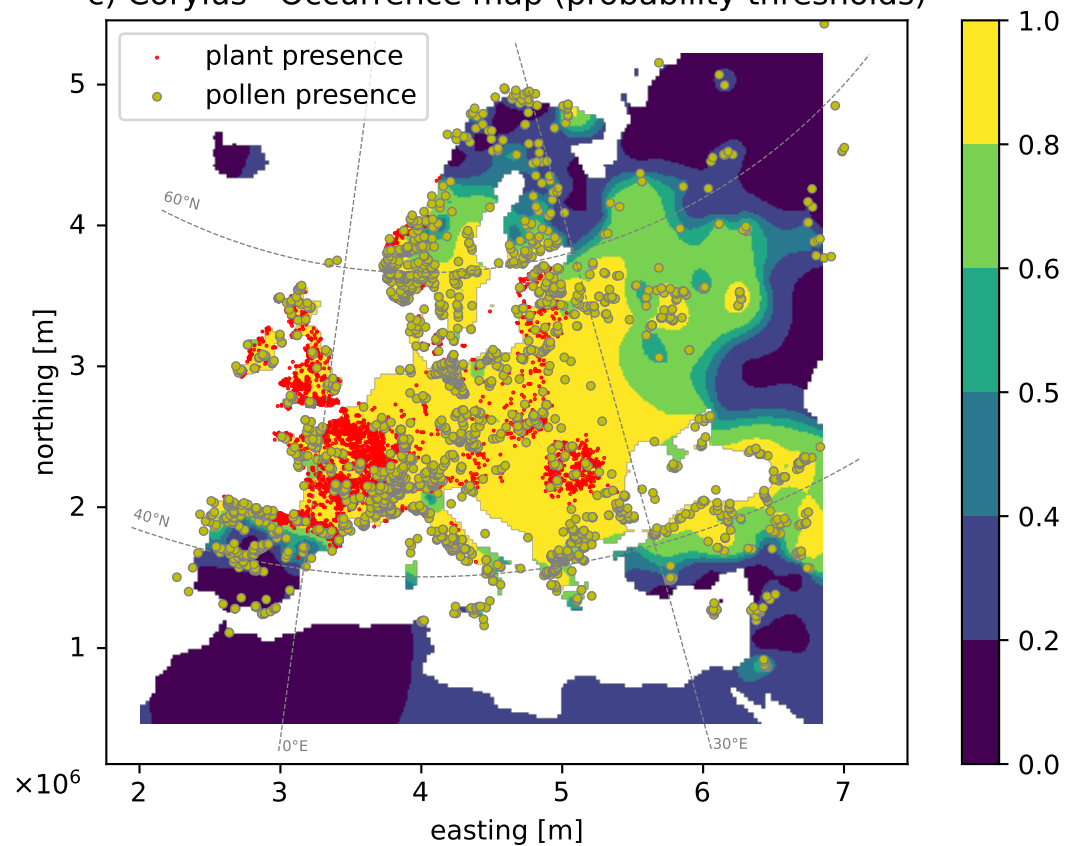d) *Corylus* - Occurrence uncertainty (Kriging variance)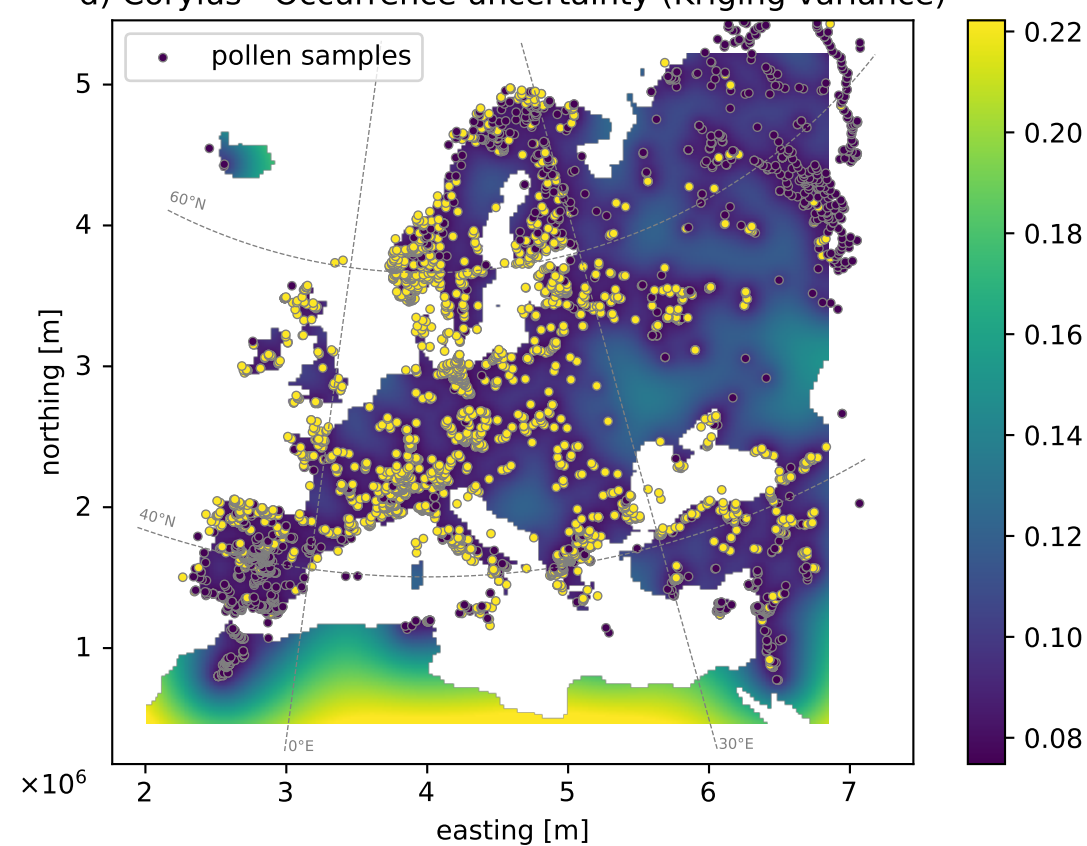

a) *Fagus* - Occurrence probability (Kriging mean)

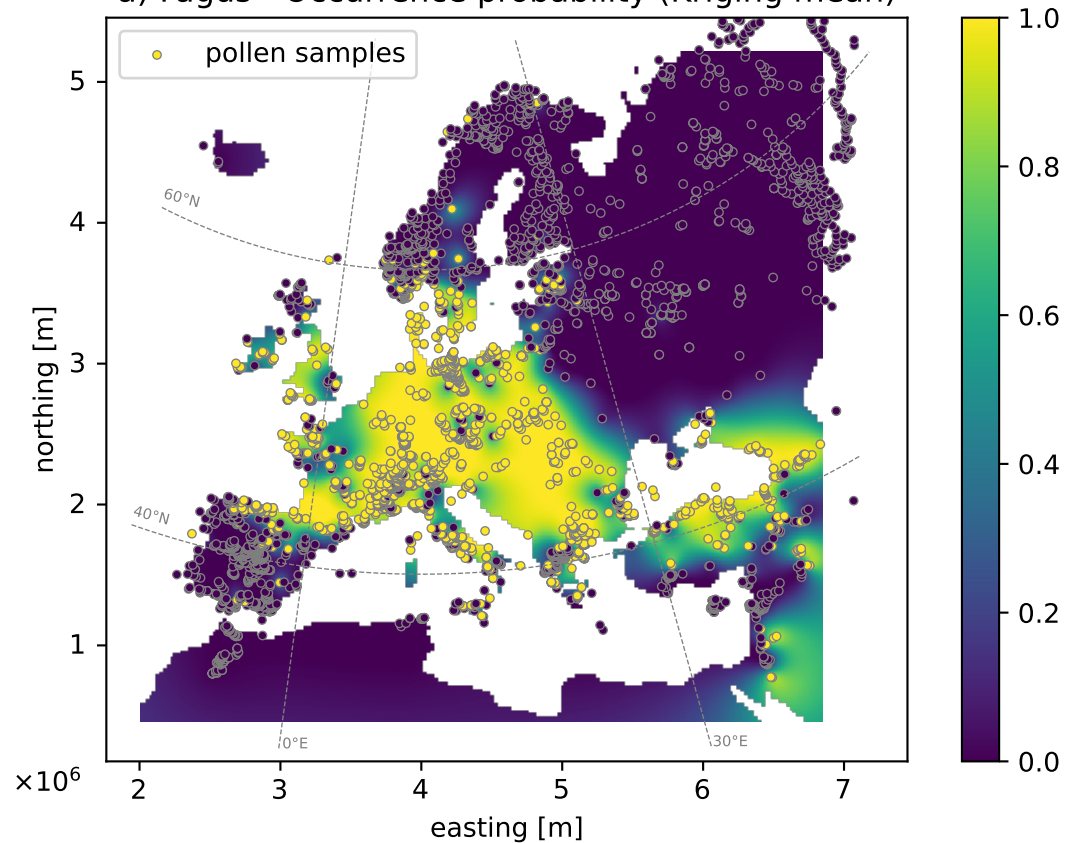

b) *Fagus* - Semivariogram

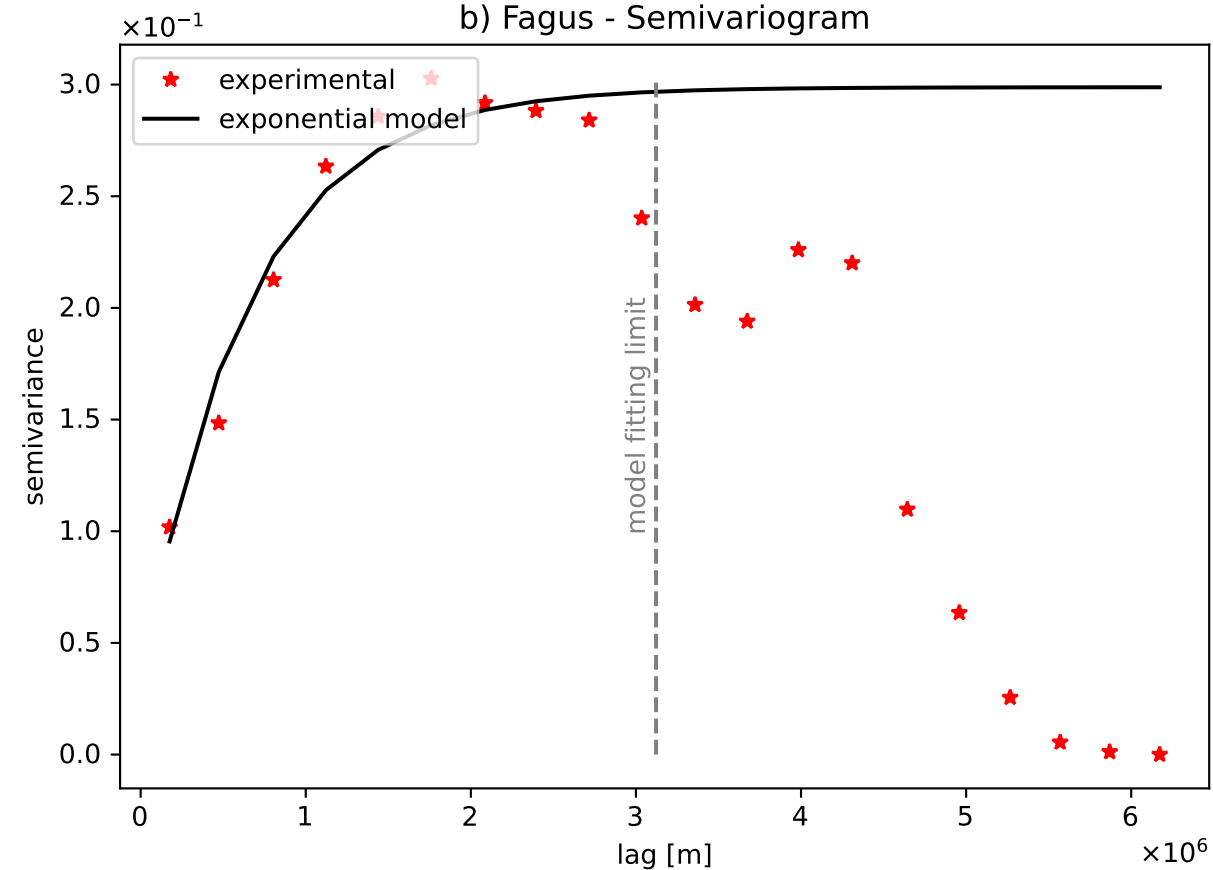

c) *Fagus* - Occurrence map (probability thresholds)

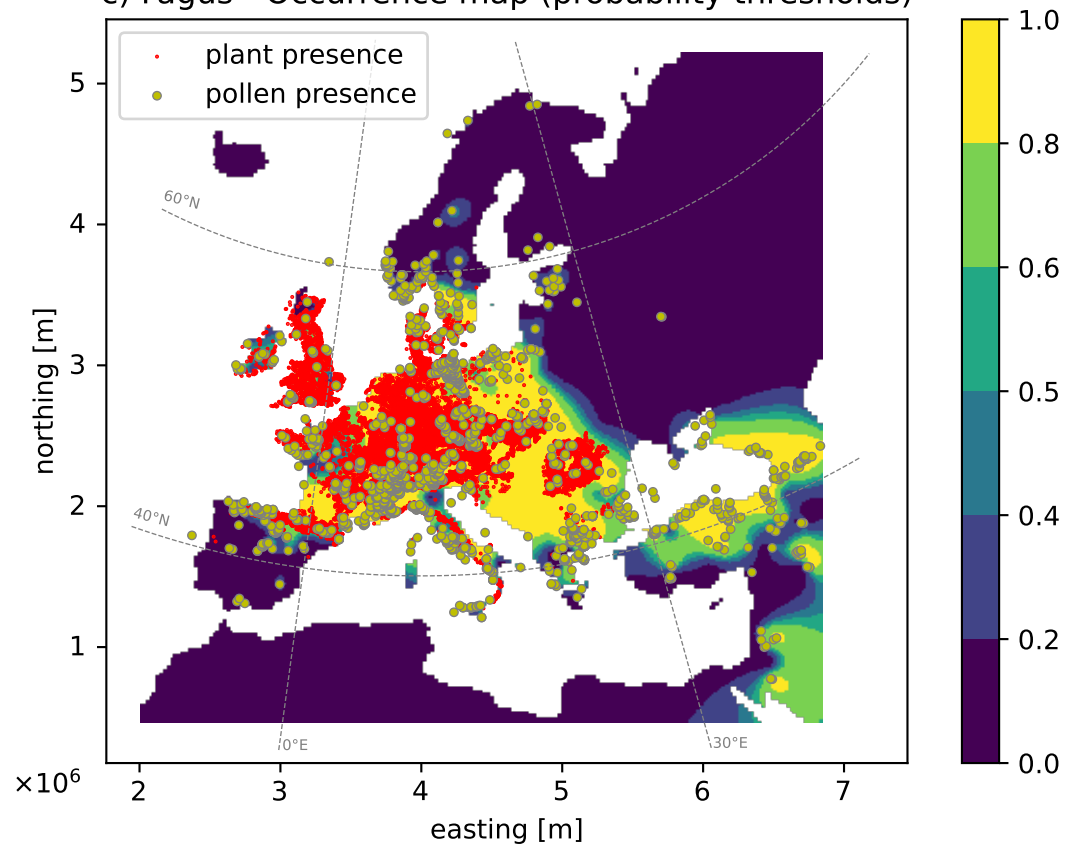

d) *Fagus* - Occurrence uncertainty (Kriging variance)

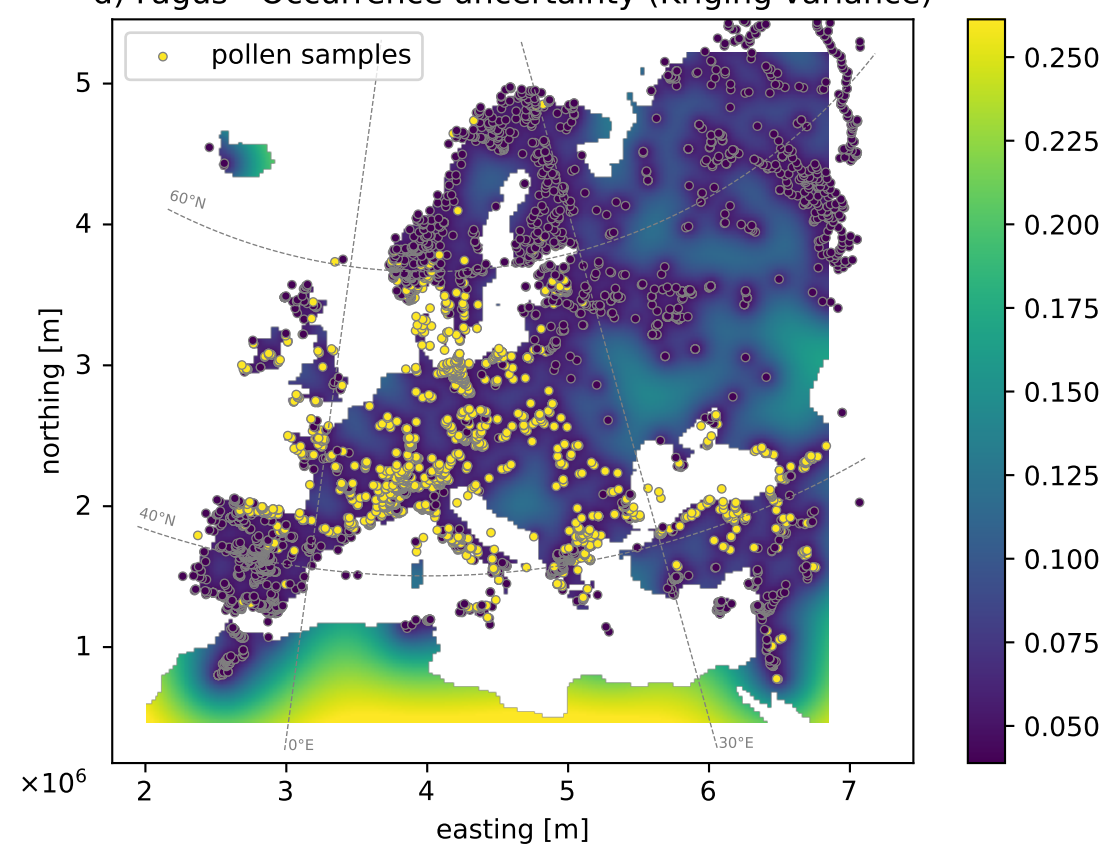

a) Juglans - Occurrence probability (Kriging mean)

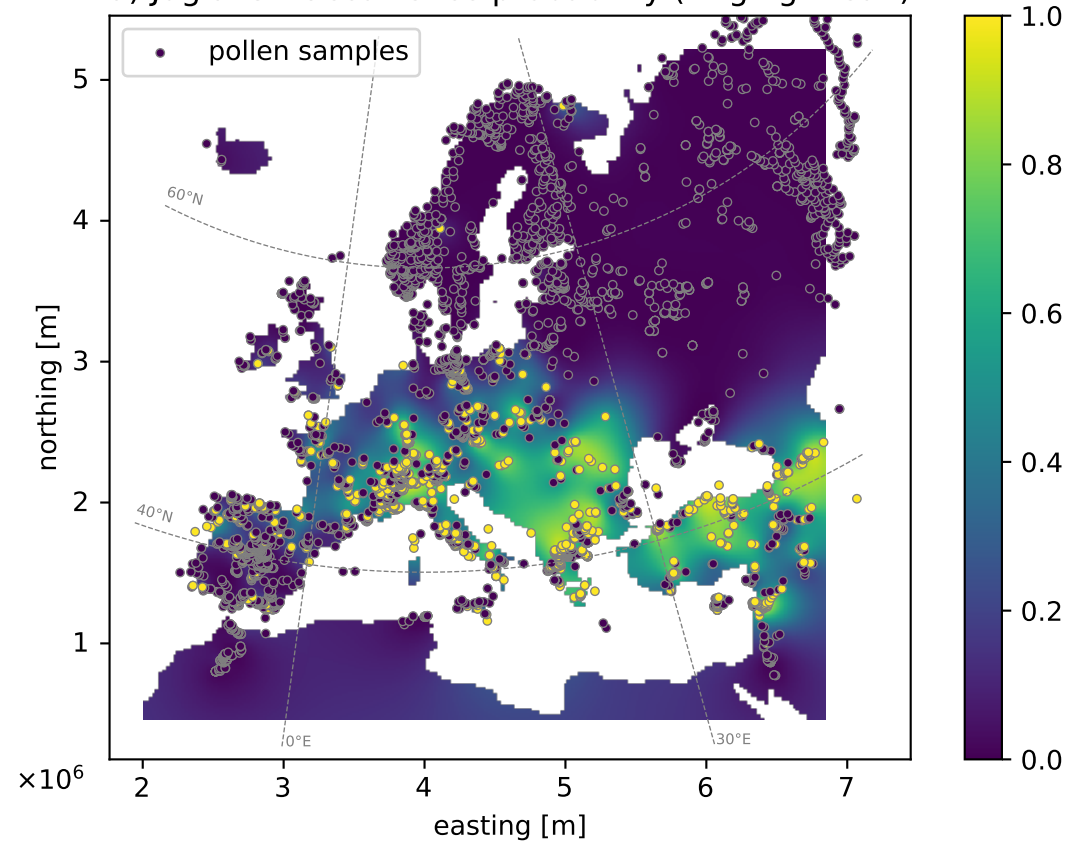

b) Juglans - Semivariogram

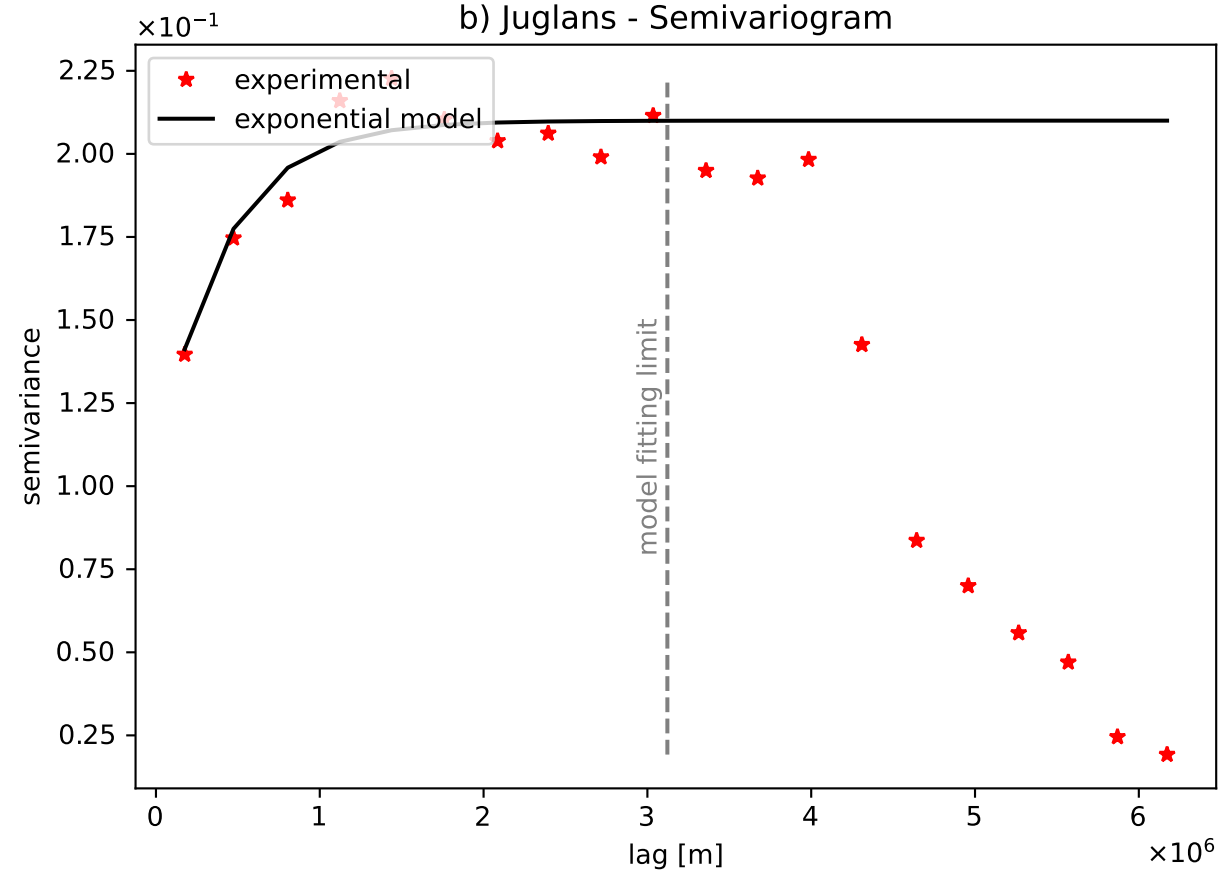

c) Juglans - Occurrence map (probability thresholds)

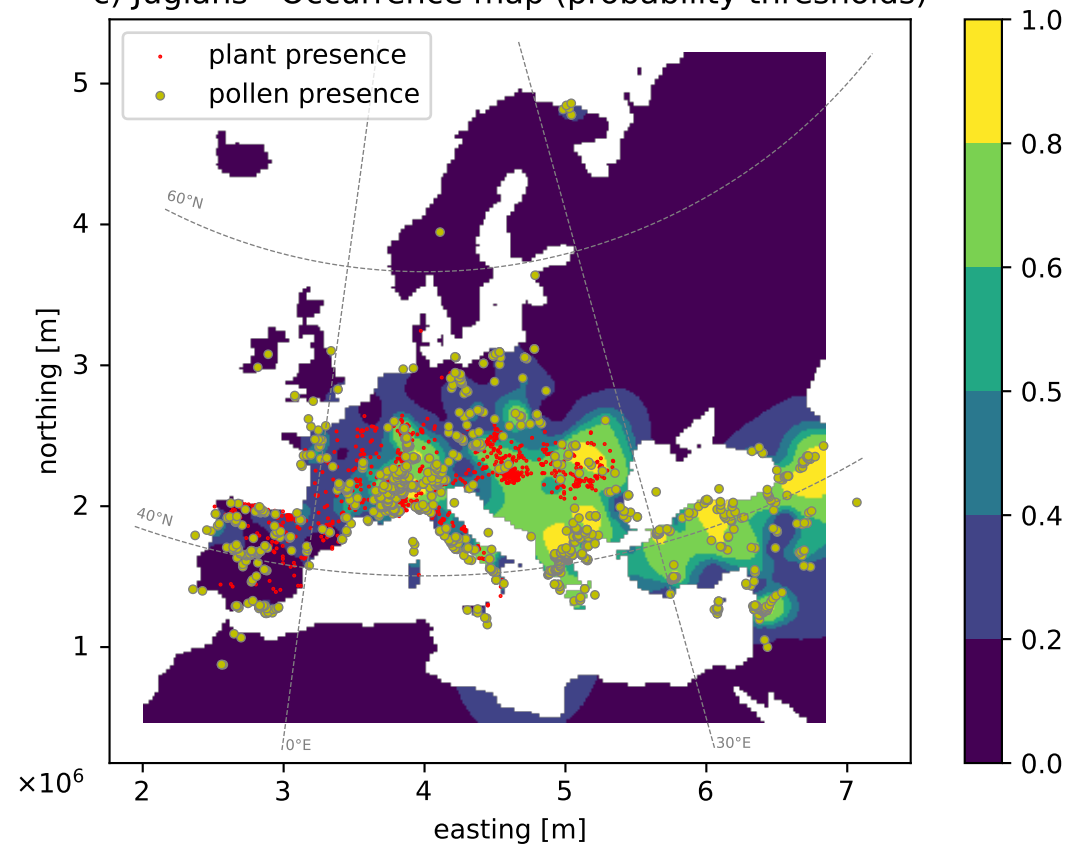

d) Juglans - Occurrence uncertainty (Kriging variance)

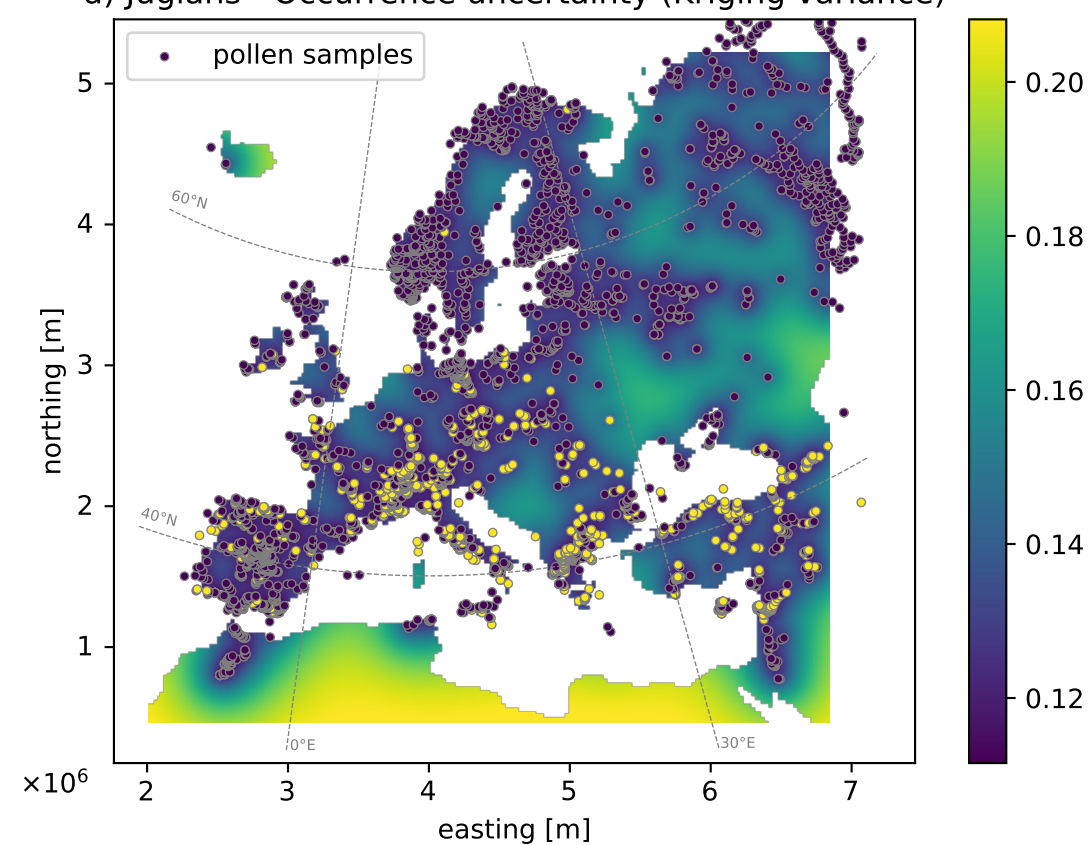



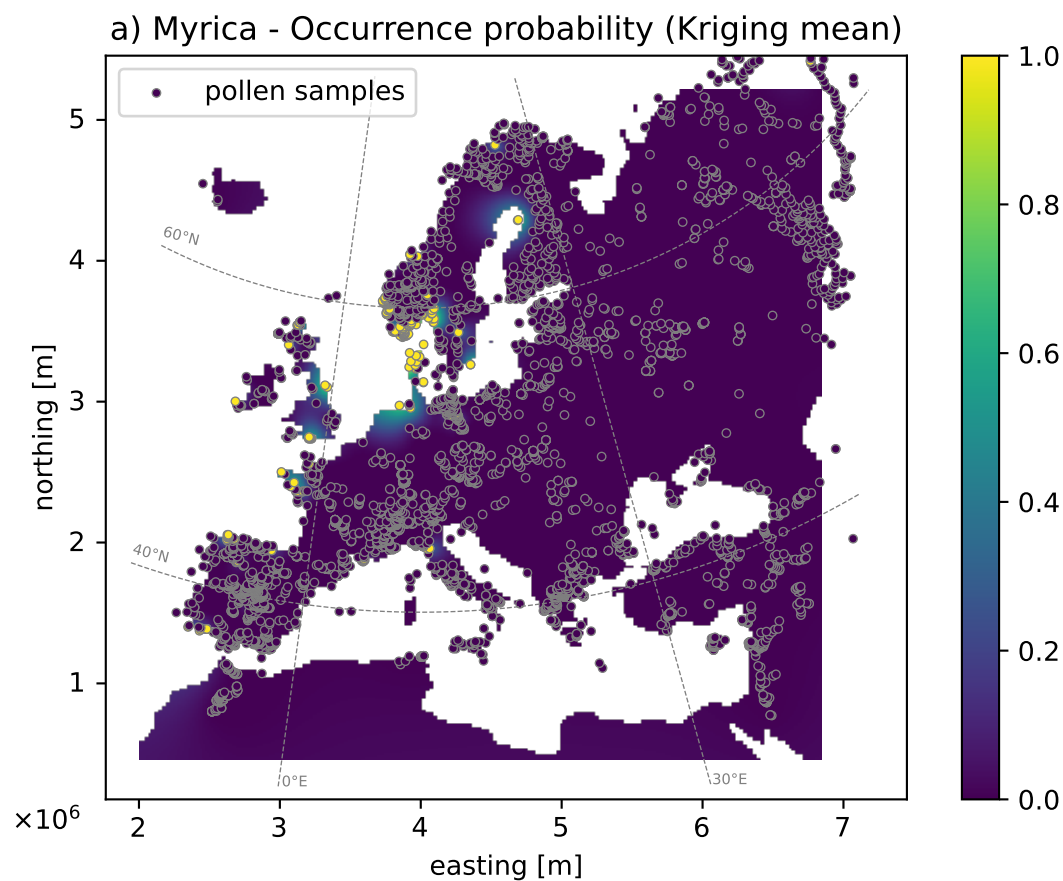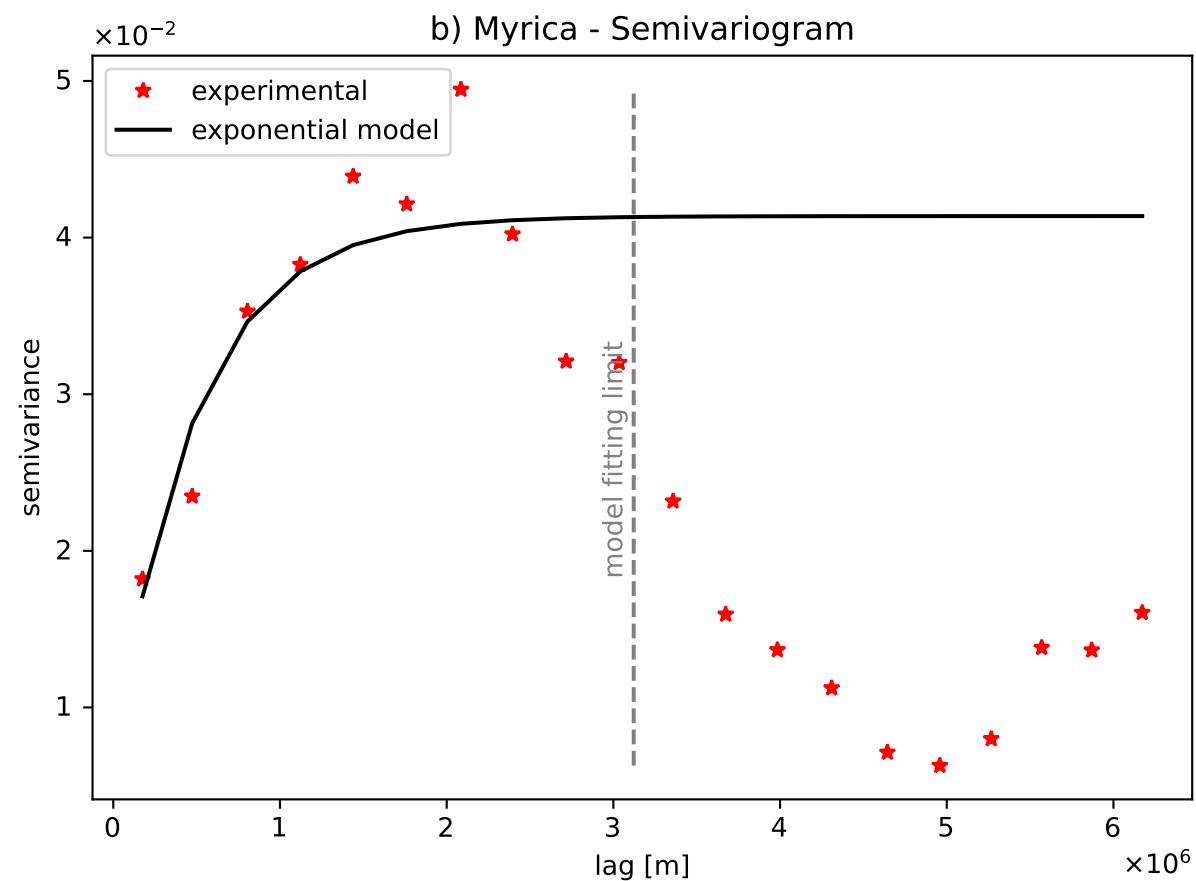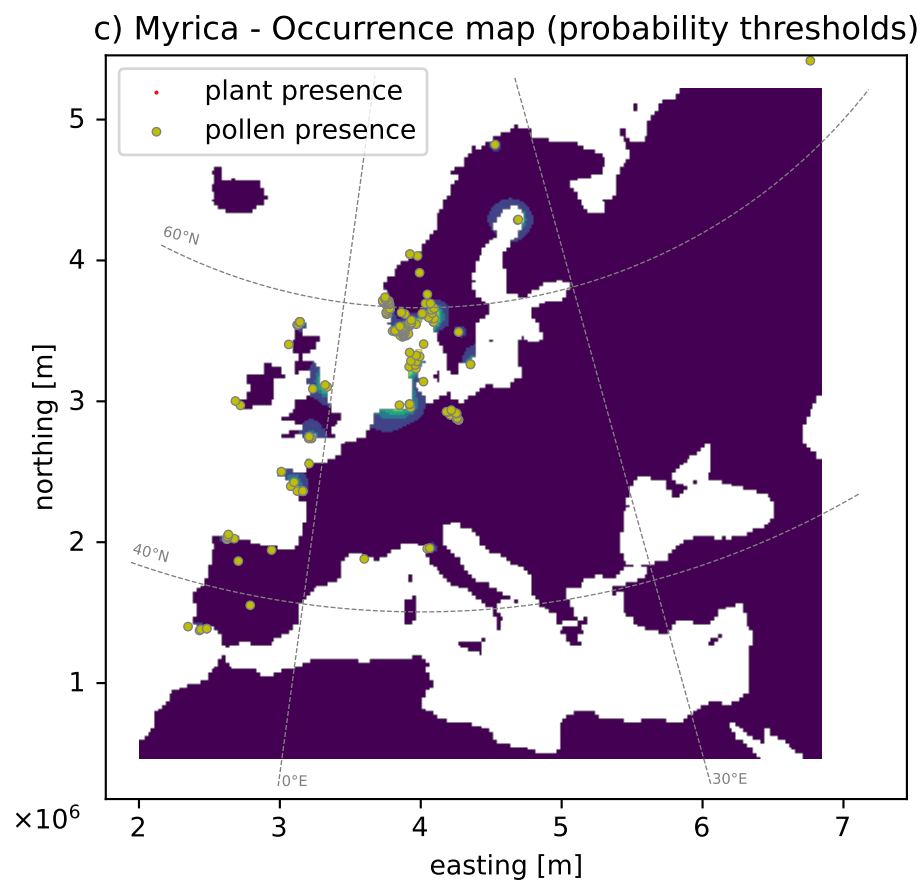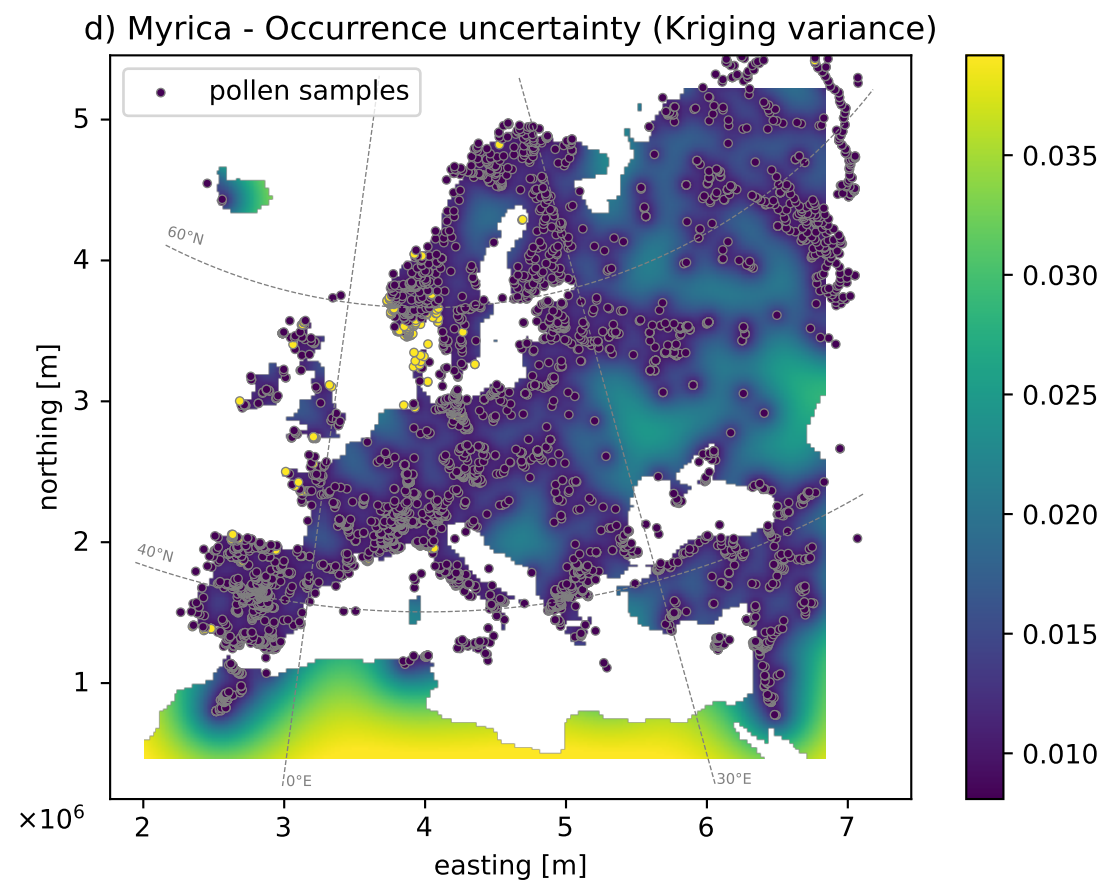



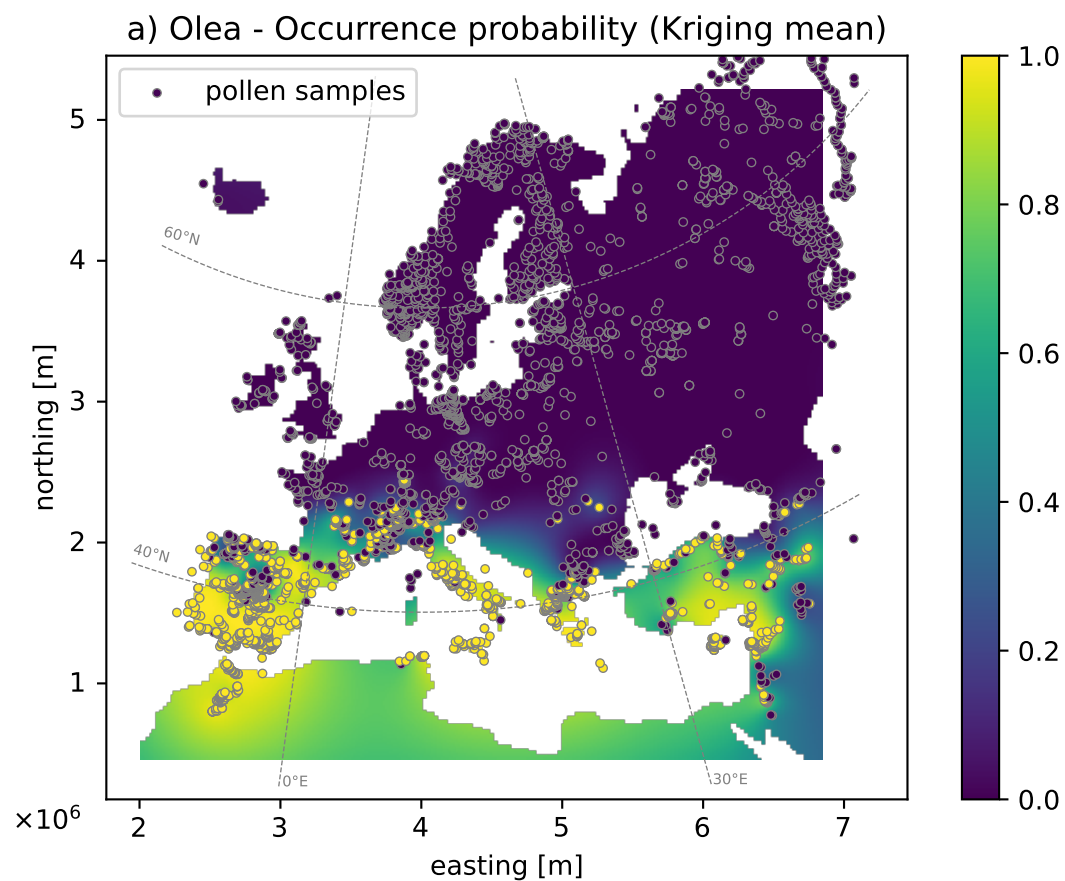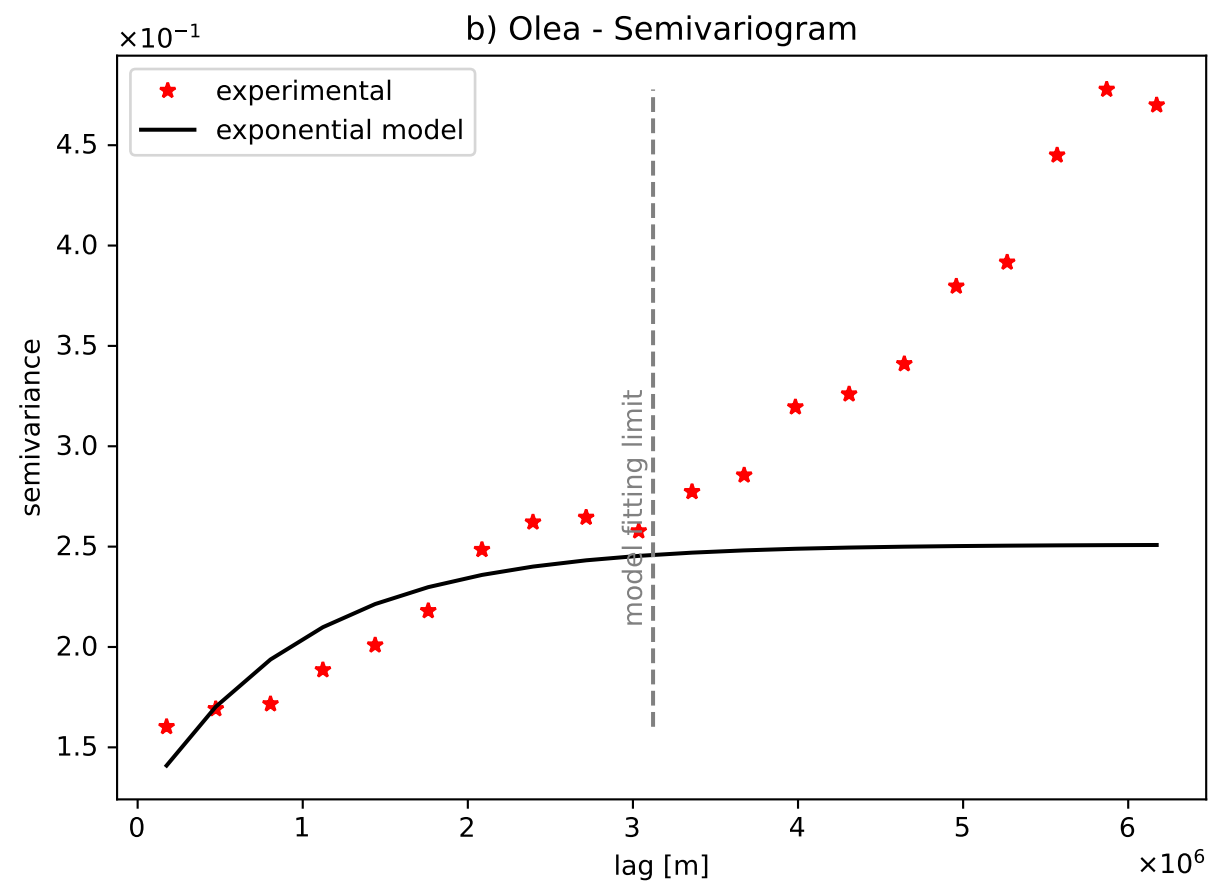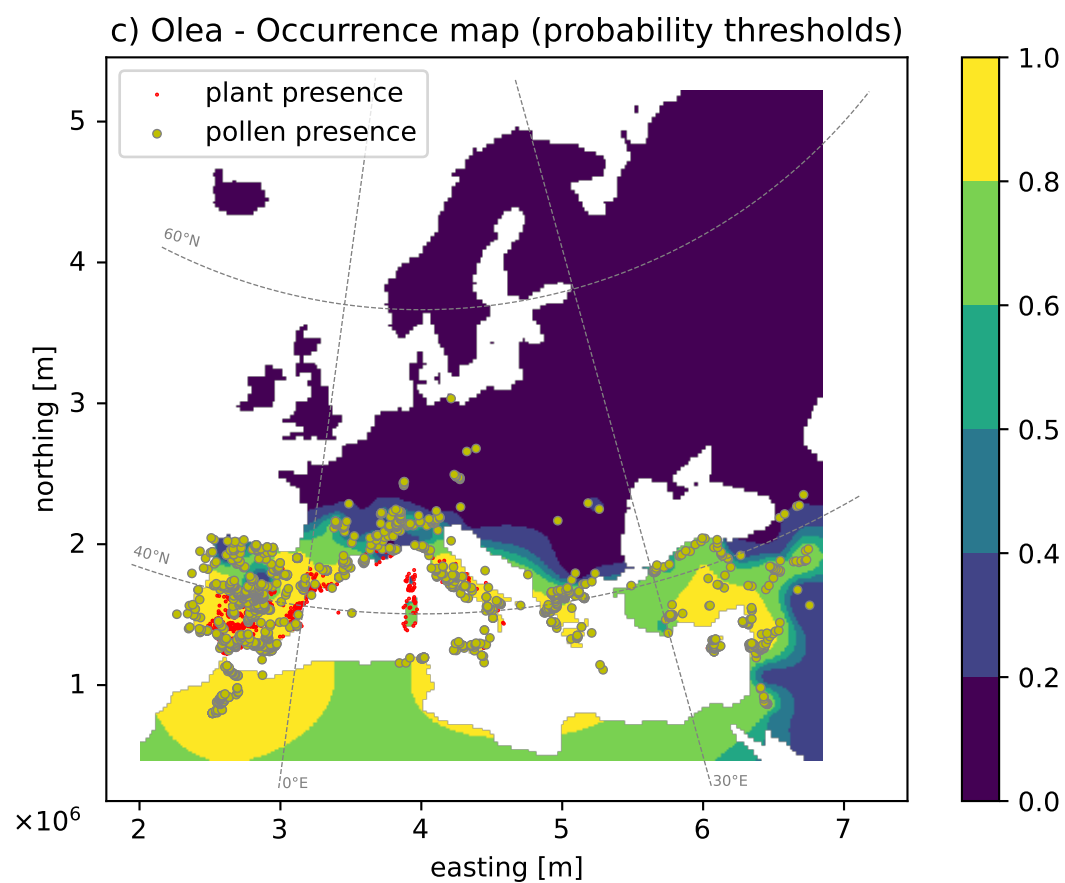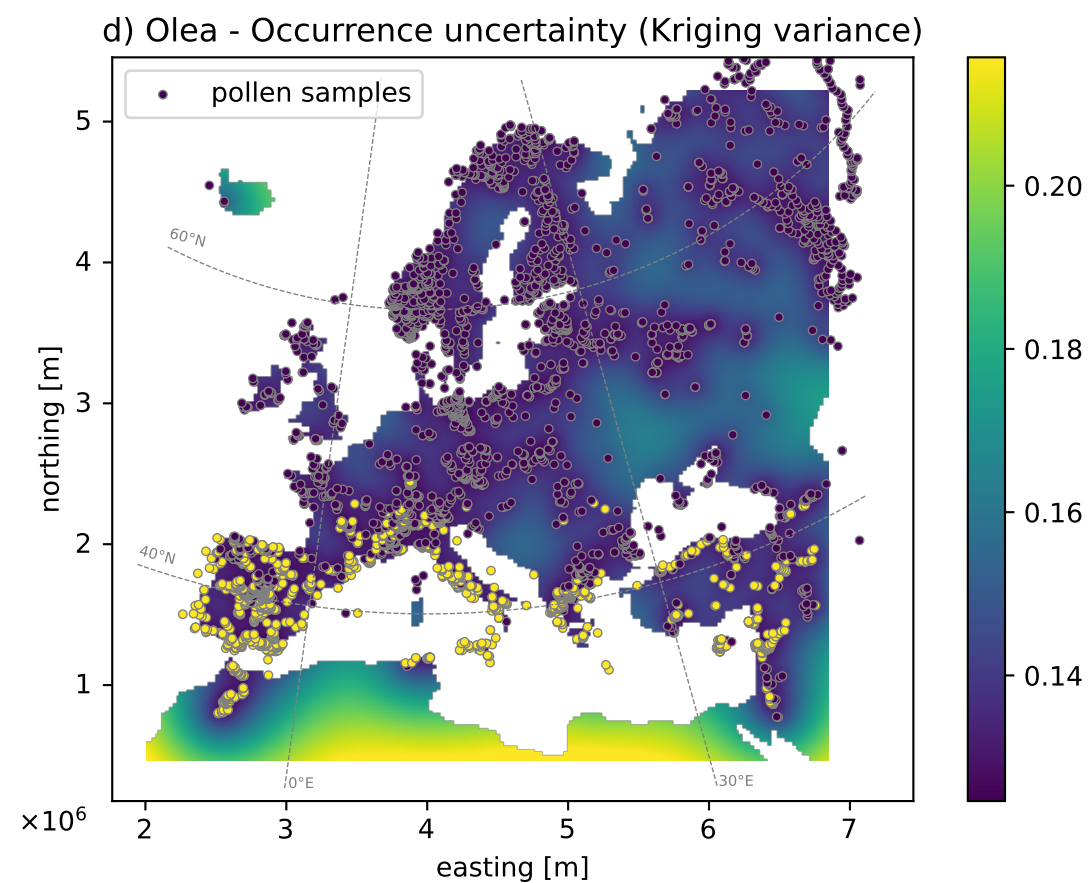

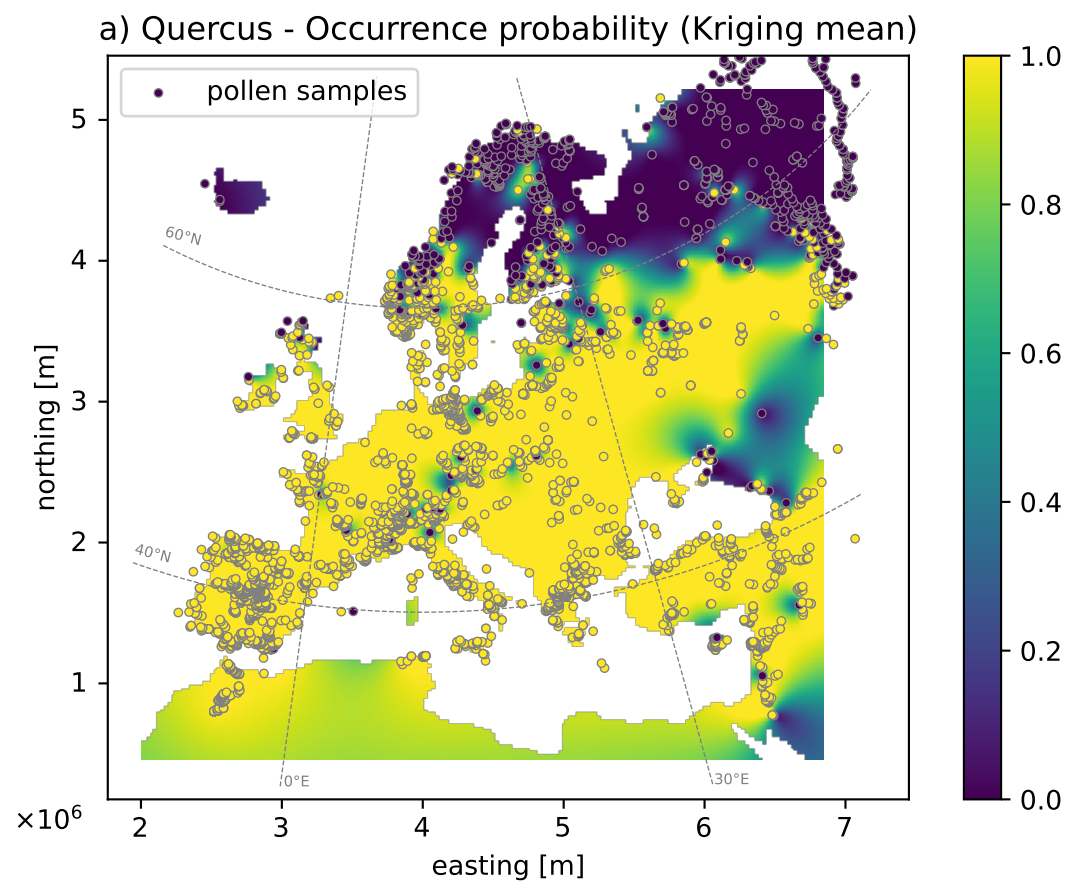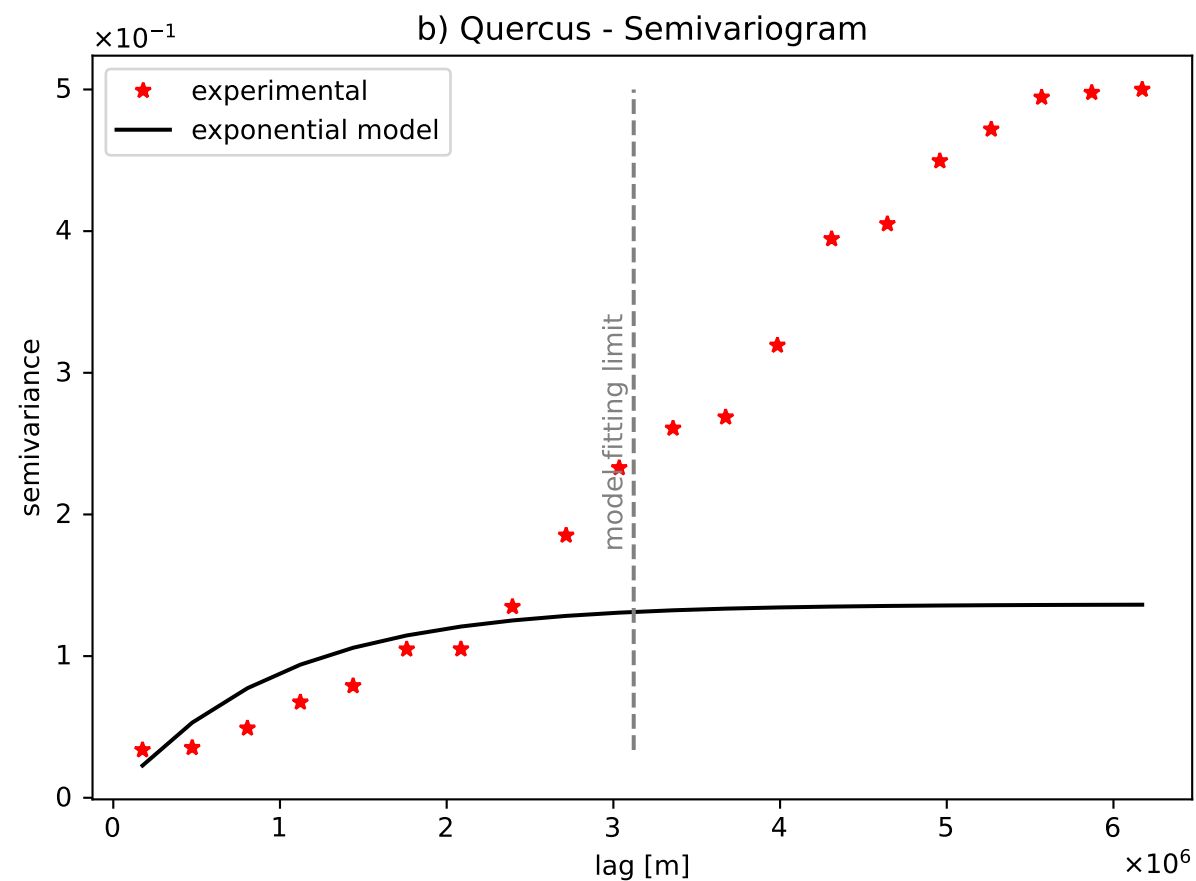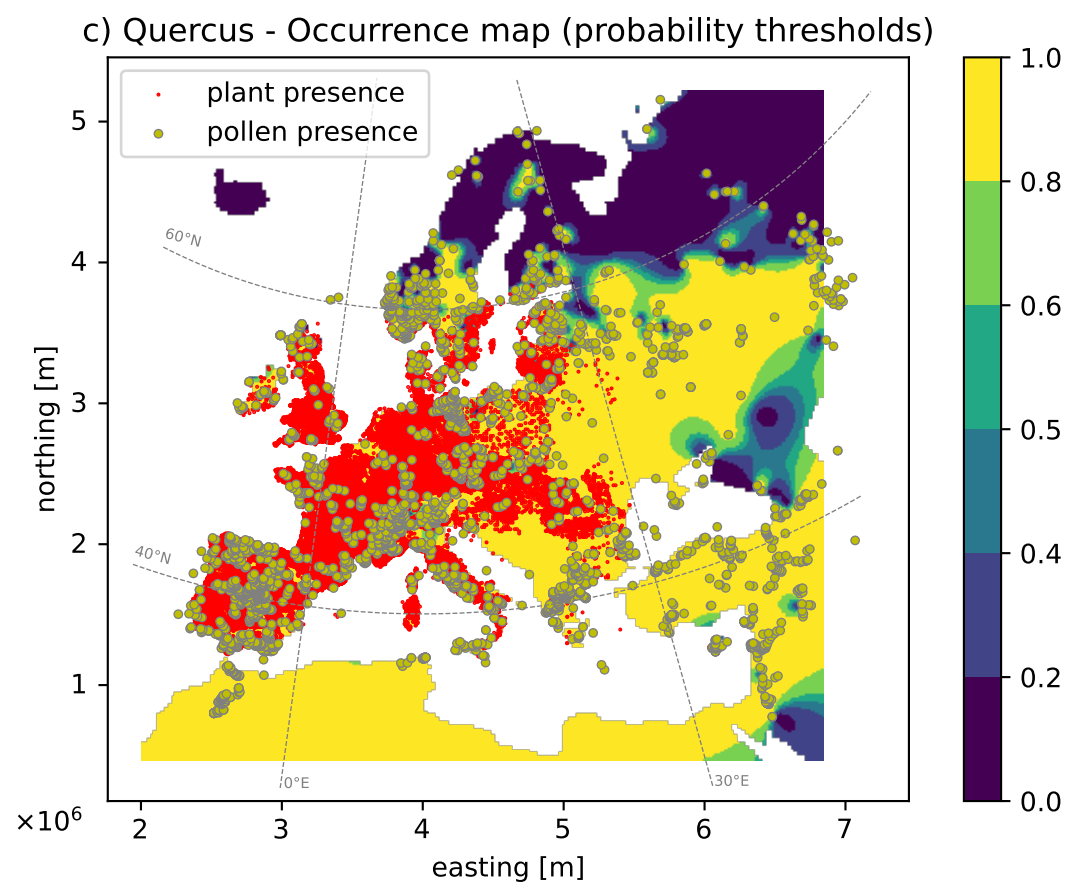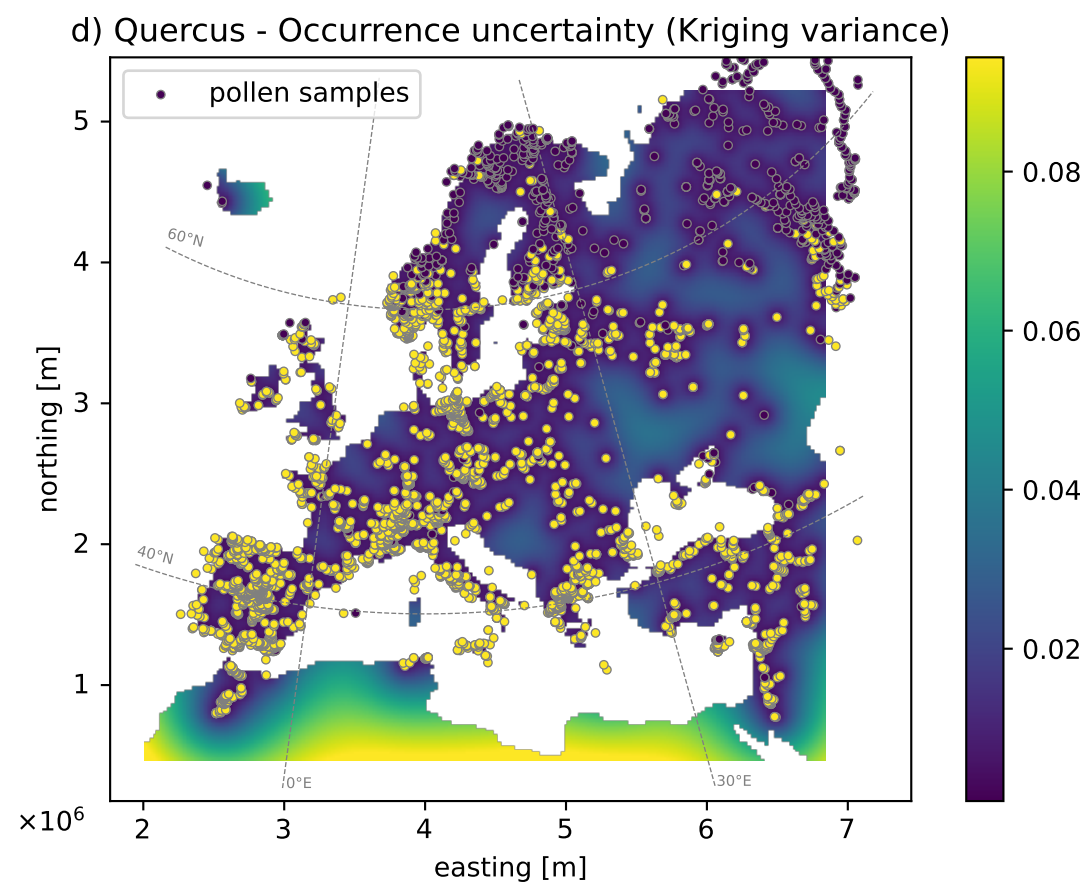

Supplement: Supplementary file 4 [file essd-16-731-2024-supplement.zip]
