# Supplementary material for: EUPollMap: the European atlas of contemporary pollen distribution maps derived from an integrated Kriging interpolation approach
Source: Copernicus journal article supplement (doi:10.5194/essd-16-731-2024), 2024-01-31
Supplement: Supplementary file 2 [file essd-16-731-2024-supplement.zip]

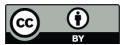

## *Supplement of*

# **EUPollMap: the European atlas of contemporary pollen distribution maps derived from an integrated Kriging interpolation approach**

**Fabio Oriani et al.**

*Correspondence to:* Fabio Oriani ([fabio.oriani@protonmail.com](mailto:fabio.oriani@protonmail.com))

- [essd-16-731-2024-supplement-title-page.pdf](#)
- [supplemental](#)
  - [supplemental\\_1.pdf](#)
  - [supplemental\\_2.pdf](#)
  - [supplemental\\_3.pdf](#)

The copyright of individual parts of the supplement might differ from the article licence.
