# Supplementary material for: EUPollMap: the European atlas of contemporary pollen distribution maps derived from an integrated Kriging interpolation approach
Source: Copernicus journal article supplement (doi:10.5194/essd-16-731-2024), 2024-01-31
Supplement: Supplementary file 3 [file essd-16-731-2024-supplement.zip]

| TAXA LIST |                    |      | Observed occurrence frequency [0-1] for different predicted probability classes |             |             |             |             |             |             |             |             |             |
|-----------|--------------------|------|---------------------------------------------------------------------------------|-------------|-------------|-------------|-------------|-------------|-------------|-------------|-------------|-------------|
| #         | Name               | TRSH | 0-0.09                                                                          | 0.10-0.19   | 0.20-0.29   | 0.30-0.39   | 0.40-0.49   | 0.50-0.59   | 0.60-0.69   | 0.70-0.79   | 0.80-0.89   | 0.90-1.00   |
| 1         | Abies              | TRSH | 0.06                                                                            | 0.20        | 0.17        | 0.29        | 0.46        | 0.46        | 0.64        | 0.76        | 0.85        | 0.85        |
| 2         | Acacia             | TRSH | 0.01                                                                            | 0.18        | -           | -           | -           | -           | -           | -           | -           | -           |
| 3         | Acanthaceae        | TRSH | 0.00                                                                            | -           | <b>0.00</b> | -           | -           | -           | -           | -           | -           | -           |
| 4         | Acer               | TRSH | 0.06                                                                            | 0.11        | 0.22        | 0.25        | 0.46        | 0.63        | 0.65        | 0.75        | -           | -           |
| 5         | Actinidiaceae      | TRSH | <b>1.00</b>                                                                     | -           | -           | -           | -           | -           | -           | -           | -           | -           |
| 6         | Adoxaceae          | TRSH | 0.00                                                                            | -           | -           | <b>0.00</b> | -           | <b>0.00</b> | -           | -           | -           | -           |
| 7         | Aesculus           | UPHE | 0.01                                                                            | -           | -           | -           | -           | -           | -           | -           | -           | -           |
| 8         | Ailanthus          | HERB | 0.00                                                                            | -           | -           | -           | -           | -           | -           | -           | -           | -           |
| 9         | Aizoaceae          | HERB | 0.00                                                                            | -           | <b>0.00</b> | -           | -           | <b>0.00</b> | -           | -           | -           | <b>0.50</b> |
| 10        | Alnus              | TRSH | <b>0.57</b>                                                                     | 0.00        | 0.32        | 0.22        | 0.48        | 0.58        | 0.60        | 0.71        | 0.86        | 0.98        |
| 11        | Amaranthaceae      | HERB | <b>0.70</b>                                                                     | 0.16        | 0.15        | 0.36        | 0.52        | 0.54        | 0.66        | 0.72        | 0.90        | 0.95        |
| 12        | Amaryllidaceae     | TRSH | 0.01                                                                            | -           | -           | -           | -           | -           | -           | -           | -           | -           |
| 13        | Anacardiaceae      | HERB | 0.00                                                                            | 0.00        | <b>0.00</b> | -           | -           | -           | -           | -           | -           | -           |
| 14        | Apiaceae           | TRSH | <b>0.58</b>                                                                     | 0.16        | 0.20        | 0.36        | 0.44        | 0.59        | 0.66        | 0.79        | 0.90        | -           |
| 15        | Araceae            | TRSH | <b>1.00</b>                                                                     | -           | -           | -           | -           | -           | -           | -           | -           | -           |
| 16        | Araliaceae         | TRSH | 0.05                                                                            | 0.12        | 0.15        | 0.32        | <b>0.15</b> | <b>0.07</b> | <b>0.35</b> | <b>0.43</b> | <b>0.04</b> | <b>0.27</b> |
| 17        | Arbutus            | TRSH | 0.03                                                                            | -           | -           | -           | -           | -           | -           | -           | -           | -           |
| 18        | Arctostaphylos     | HERB | 0.01                                                                            | 0.14        | -           | -           | -           | -           | -           | -           | -           | -           |
| 19        | Arecaceae          | HERB | 0.00                                                                            | -           | <b>0.00</b> | -           | <b>0.00</b> | -           | -           | -           | -           | -           |
| 20        | Aristolochiaceae   | HERB | 0.00                                                                            | 0.00        | -           | -           | -           | -           | -           | <b>0.00</b> | -           | -           |
| 21        | Artemisia          | HERB | <b>0.47</b>                                                                     | 0.19        | <b>0.47</b> | 0.33        | 0.55        | 0.61        | 0.73        | 0.75        | 0.83        | 0.94        |
| 22        | Asparagaceae       | HERB | 0.01                                                                            | -           | -           | -           | -           | -           | -           | -           | -           | -           |
| 23        | Asphodelaceae      | TRSH | 0.05                                                                            | -           | -           | -           | -           | -           | -           | -           | -           | -           |
| 24        | Asteraceae undiff. | TRSH | <b>0.91</b>                                                                     | -           | 0.21        | 0.39        | 0.49        | 0.53        | 0.65        | 0.71        | 0.85        | 0.95        |
| 25        | Balsaminaceae      | HERB | 0.01                                                                            | -           | -           | -           | -           | -           | -           | -           | -           | -           |
| 26        | Berberidaceae      | UPHE | 0.01                                                                            | -           | -           | -           | -           | -           | -           | -           | -           | -           |
| 27        | Betula             | HERB | <b>0.38</b>                                                                     | 0.08        | 0.22        | 0.29        | 0.40        | 0.47        | 0.69        | 0.81        | 0.89        | 0.97        |
| 28        | Betulaceae undiff. | HERB | <b>1.00</b>                                                                     | -           | -           | -           | -           | -           | -           | -           | -           | -           |
| 29        | Boraginaceae       | TRSH | 0.13                                                                            | 0.14        | -           | -           | -           | -           | -           | -           | -           | -           |
| 30        | Brassicaceae       | TRSH | <b>0.26</b>                                                                     | 0.20        | 0.23        | 0.27        | 0.40        | 0.58        | 0.60        | 0.80        | 0.85        | 0.92        |
| 31        | Buddleja           | TRSH | 0.00                                                                            | -           | -           | -           | -           | -           | -           | -           | -           | -           |
| 32        | Buxus              | HERB | 0.04                                                                            | -           | -           | -           | -           | -           | -           | -           | -           | -           |
| 33        | Camellia           | LIAN | <b>1.00</b>                                                                     | -           | -           | -           | -           | -           | -           | -           | -           | -           |
| 34        | Campanulaceae      | TRSH | 0.04                                                                            | 0.11        | -           | -           | -           | -           | -           | -           | -           | -           |
| 35        | Cannabaceae        | HERB | 0.04                                                                            | 0.10        | 0.23        | 0.26        | 0.36        | 0.54        | 0.53        | 0.83        | 0.88        | -           |
| 36        | Capparaceae        | HERB | 0.00                                                                            | -           | <b>0.00</b> | <b>0.00</b> | -           | <b>0.00</b> | <b>0.00</b> | <b>0.00</b> | <b>0.00</b> | <b>0.00</b> |
| 37        | Capparis           | TRSH | 0.00                                                                            | 0.00        | <b>0.00</b> | <b>0.00</b> | -           | -           | -           | -           | -           | <b>0.22</b> |
| 38        | Caprifoliaceae     | TRSH | 0.11                                                                            | 0.12        | -           | -           | -           | -           | -           | -           | -           | -           |
| 39        | Carya              | HERB | 0.00                                                                            | 0.00        | -           | -           | -           | -           | -           | -           | -           | -           |
| 40        | Caryophyllaceae    | HERB | <b>0.39</b>                                                                     | 0.10        | 0.21        | 0.39        | 0.48        | 0.52        | 0.65        | 0.80        | <b>0.67</b> | -           |
| 41        | Castanea           | TRSH | 0.03                                                                            | 0.13        | 0.20        | 0.36        | 0.44        | 0.61        | 0.61        | 0.83        | 0.90        | 0.97        |
| 42        | Casuarina          | HERB | 0.00                                                                            | <b>0.33</b> | <b>0.00</b> | 0.20        | 0.33        | <b>0.00</b> | <b>0.00</b> | <b>0.00</b> | <b>0.50</b> | -           |
| 43        | Cedrus             | HERB | 0.02                                                                            | 0.09        | 0.16        | <b>0.17</b> | 0.33        | <b>0.35</b> | 0.70        | 0.72        | <b>0.58</b> | 0.97        |
| 44        | Celastraceae       | HERB | 0.01                                                                            | -           | -           | -           | -           | -           | -           | -           | -           | -           |
| 45        | Celtis             | HERB | 0.01                                                                            | -           | -           | -           | -           | -           | -           | -           | -           | -           |
| 46        | Cephalanthus       | HERB | <b>1.00</b>                                                                     | -           | -           | -           | -           | -           | -           | -           | -           | -           |
| 47        | Ceratonina         | TRSH | 0.01                                                                            | 0.00        | <b>0.00</b> | <b>0.11</b> | -           | <b>0.00</b> | -           | -           | -           | -           |
| 48        | Cercis             | TRSH | 0.00                                                                            | 0.00        | -           | -           | -           | -           | -           | <b>0.00</b> | -           | -           |
| 49        | Chamaerops         | TRSH | 0.00                                                                            | 0.00        | <b>0.00</b> | -           | -           | -           | -           | -           | -           | -           |
| 50        | Cistaceae          | TRSH | 0.04                                                                            | 0.10        | 0.25        | 0.40        | 0.48        | 0.61        | 0.71        | <b>0.92</b> | -           | -           |
| 51        | Citrus             | TRSH | 0.01                                                                            | 0.00        | <b>0.00</b> | 0.50        | 0.50        | -           | -           | -           | -           | -           |
| 52        | Clethra            | HERB | <b>1.00</b>                                                                     | -           | -           | -           | -           | -           | -           | -           | -           | -           |
| 53        | Colchicaceae       | TRSH | 0.00                                                                            | 0.00        | -           | -           | -           | -           | -           | -           | -           | -           |
| 54        | Convolvulaceae     | HERB | 0.03                                                                            | 0.11        | 0.13        | 0.37        | <b>0.21</b> | -           | -           | -           | -           | -           |
| 55        | Coriariaceae       | HERB | 0.00                                                                            | -           | -           | -           | -           | -           | -           | -           | -           | -           |
| 56        | Cornus             | HERB | 0.02                                                                            | 0.11        | 0.25        | <b>0.00</b> | -           | -           | -           | -           | -           | -           |
| 57        | Corylus            | TRSH | <b>0.30</b>                                                                     | 0.14        | 0.19        | 0.49        | 0.38        | 0.42        | <b>0.49</b> | 0.78        | 0.89        | 0.95        |
| 58        | Cotinus            | HERB | 0.00                                                                            | -           | -           | -           | -           | -           | -           | -           | -           | -           |
| 59        | Crassulaceae       | TRSH | 0.07                                                                            | <b>0.45</b> | -           | -           | <b>0.00</b> | -           | -           | -           | -           | -           |
| 60        | Crataegus          | HERB | 0.01                                                                            | 0.11        | 0.35        | 0.40        | <b>0.00</b> | <b>0.33</b> | <b>0.00</b> | <b>0.00</b> | -           | -           |
| 61        | Cryptomeria        | HERB | 0.00                                                                            | -           | -           | -           | -           | -           | -           | -           | -           | -           |
| 62        | Cucurbitaceae      | HERB | 0.00                                                                            | -           | -           | -           | -           | -           | -           | -           | -           | -           |
| 63        | Cupressaceae       | HERB | 0.01                                                                            | 0.08        | 0.16        | <b>0.13</b> | <b>0.09</b> | <b>0.25</b> | <b>0.14</b> | <b>0.92</b> | <b>0.44</b> | <b>0.75</b> |
| 64        | Cyperaceae         | HERB | <b>0.57</b>                                                                     | 0.00        | <b>0.07</b> | 0.25        | 0.41        | 0.56        | 0.67        | 0.75        | 0.90        | 0.94        |
| 65        | Cytinaceae         | HERB | 0.00                                                                            | -           | -           | -           | -           | -           | -           | -           | -           | -           |
| 66        | Datisceae          | DWAR | 0.00                                                                            | -           | -           | <b>0.00</b> | -           | -           | -           | -           | -           | -           |
| 67        | Dioscoreaceae      | DWAR | 0.00                                                                            | 0.15        | <b>0.00</b> | -           | -           | -           | -           | -           | -           | -           |
| 68        | Dipsacaceae        | HERB | 0.01                                                                            | 0.21        | 0.23        | <b>0.15</b> | <b>0.07</b> | 0.50        | <b>0.45</b> | <b>0.00</b> | <b>0.11</b> | <b>0.20</b> |

|     |                  |      |             |             |             |             |             |             |             |             |             |             |
|-----|------------------|------|-------------|-------------|-------------|-------------|-------------|-------------|-------------|-------------|-------------|-------------|
| 69  | Elaeagnaceae     | HERB | 0.01        | 0.17        | -           | -           | -           | -           | -           | -           | -           | -           |
| 70  | Elaeagnus        | HERB | 0.00        | 0.00        | -           | -           | -           | -           | -           | -           | -           | -           |
| 71  | Ephedraceae      | HERB | 0.04        | 0.10        | 0.29        | 0.44        | 0.52        | 0.41        | <b>1.00</b> | 0.75        | -           | -           |
| 72  | Ericales         | HERB | <b>0.56</b> | 0.05        | 0.22        | 0.24        | 0.40        | 0.60        | 0.66        | 0.75        | 0.92        | 0.96        |
| 73  | Eucalyptus       | TRSH | 0.02        | 0.19        | <b>0.44</b> | 0.24        | <b>0.00</b> | <b>0.33</b> | <b>0.20</b> | <b>0.13</b> | <b>0.25</b> | <b>0.00</b> |
| 74  | Euonymus         | LIAN | 0.00        | -           | -           | -           | -           | -           | -           | -           | -           | -           |
| 75  | Euphorbiaceae    | HERB | 0.04        | 0.15        | 0.24        | 0.37        | 0.40        | <b>0.36</b> | 0.64        | -           | -           | -           |
| 76  | Fabaceae         | HERB | <b>0.23</b> | 0.15        | 0.16        | 0.41        | 0.42        | 0.61        | 0.69        | 0.86        | 0.88        | -           |
| 77  | Fagus            | HERB | 0.11        | 0.09        | 0.13        | 0.32        | 0.42        | 0.63        | 0.73        | 0.77        | 0.92        | 0.96        |
| 78  | Ficus            | HERB | 0.00        | 0.00        | <b>0.00</b> | -           | -           | -           | -           | -           | -           | -           |
| 79  | Flueggea         | TRSH | 0.00        | -           | -           | -           | -           | -           | -           | -           | -           | -           |
| 80  | Fothergilla      | HERB | <b>1.00</b> | -           | -           | -           | -           | -           | -           | -           | -           | -           |
| 81  | Frangula         | HERB | 0.04        | -           | -           | -           | -           | -           | -           | -           | -           | -           |
| 82  | Frankeniaceae    | HERB | 0.00        | 0.00        | -           | -           | -           | -           | -           | -           | <b>0.00</b> | -           |
| 83  | Fraxinus         | TRSH | 0.17        | 0.09        | 0.25        | 0.41        | 0.37        | 0.50        | 0.71        | 0.71        | 0.84        | 0.93        |
| 84  | Genista          | UPHE | 0.09        | <b>0.51</b> | <b>0.73</b> | -           | <b>1.00</b> | -           | -           | -           | -           | -           |
| 85  | Gentianaceae     | TRSH | 0.04        | -           | -           | -           | -           | -           | -           | -           | -           | -           |
| 86  | Geraniaceae      | HERB | 0.04        | 0.13        | -           | -           | -           | -           | -           | -           | -           | -           |
| 87  | Grossulariaceae  | HERB | 0.00        | 0.08        | 0.10        | -           | -           | -           | -           | -           | -           | -           |
| 88  | Hamamelidaceae   | TRSH | 0.00        | 0.00        | <b>0.00</b> | -           | -           | -           | -           | -           | -           | -           |
| 89  | Heliotropium     | TRSH | 0.00        | 0.10        | <b>0.00</b> | <b>0.00</b> | <b>0.00</b> | -           | <b>0.00</b> | <b>0.00</b> | -           | -           |
| 90  | Hypericaceae     | TRSH | 0.02        | 0.10        | 0.18        | 0.48        | 0.53        | -           | 0.10        | -           | -           | -           |
| 91  | Ilex             | HERB | 0.01        | 0.09        | 0.20        | <b>0.06</b> | 0.50        | <b>0.72</b> | <b>0.00</b> | <b>1.00</b> | <b>0.50</b> | 1.00        |
| 92  | Iridaceae        | DWAR | 0.00        | -           | -           | -           | -           | -           | -           | -           | -           | -           |
| 93  | Juglandaceae     | DWAR | 0.01        | -           | -           | -           | -           | -           | -           | -           | -           | -           |
| 94  | Juglans          | DWAR | 0.06        | 0.16        | 0.22        | 0.35        | 0.44        | 0.59        | 0.66        | 0.80        | 0.90        | -           |
| 95  | Juncaceae        | TRSH | 0.01        | 0.18        | <b>0.68</b> | -           | -           | -           | -           | -           | -           | -           |
| 96  | Juniperus        | PALM | 0.17        | 0.15        | 0.26        | 0.37        | 0.53        | 0.52        | 0.72        | 0.79        | 0.87        | 0.96        |
| 97  | Keteleeria       | TRSH | <b>1.00</b> | -           | -           | -           | -           | -           | -           | -           | -           | -           |
| 98  | Laburnum         | HERB | 0.00        | -           | -           | -           | -           | -           | -           | -           | -           | -           |
| 99  | Lamiaceae        | TRSH | 0.10        | 0.09        | 0.21        | 0.33        | 0.53        | 0.59        | 0.69        | -           | -           | -           |
| 100 | Larix            | HERB | 0.10        | <b>0.85</b> | 0.29        | -           | -           | <b>1.00</b> | -           | -           | -           | -           |
| 101 | Laurus           | HERB | 0.00        | -           | -           | -           | -           | -           | -           | -           | -           | -           |
| 102 | Lentibulariaceae | HERB | 0.00        | 0.00        | 0.36        | -           | -           | -           | -           | -           | -           | -           |
| 103 | Ligustrum        | HERB | 0.03        | -           | -           | -           | -           | -           | -           | -           | -           | -           |
| 104 | Liliaceae        | HERB | 0.10        | 0.13        | <b>1.00</b> | -           | -           | -           | -           | -           | -           | -           |
| 105 | Linaceae         | HERB | 0.02        | 0.08        | -           | -           | -           | -           | -           | -           | -           | -           |
| 106 | Liquidambar      | TRSH | 0.00        | -           | -           | -           | -           | -           | -           | -           | -           | -           |
| 107 | Loranthaceae     | HERB | 0.00        | 0.00        | -           | -           | -           | -           | -           | -           | -           | -           |
| 108 | Lythraceae       | HERB | 0.01        | 0.07        | 0.13        | 0.22        | <b>0.00</b> | -           | -           | -           | -           | -           |
| 109 | Magnolia         | HERB | 0.00        | 0.00        | -           | -           | -           | -           | -           | -           | -           | -           |
| 110 | Malvaceae        | HERB | 0.02        | -           | -           | -           | -           | -           | -           | -           | -           | -           |
| 111 | Melanthiaceae    | HERB | 0.00        | 0.00        | <b>1.00</b> | -           | -           | -           | -           | -           | -           | -           |
| 112 | Montiaceae       | HERB | 0.00        | -           | <b>0.00</b> | -           | -           | -           | -           | -           | -           | -           |
| 113 | Moraceae         | HERB | 0.00        | -           | -           | -           | -           | -           | -           | -           | -           | -           |
| 114 | Morus            | HERB | 0.00        | -           | -           | -           | -           | -           | -           | -           | -           | -           |
| 115 | Myrica           | HERB | 0.01        | 0.12        | 0.32        | 0.50        | 0.53        | 0.67        | <b>0.43</b> | 0.80        | 0.82        | 0.83        |
| 116 | Myrtaceae        | HERB | 0.01        | <b>0.54</b> | -           | 0.38        | 0.30        | -           | -           | -           | -           | -           |
| 117 | Myrtus           | HERB | 0.01        | 0.23        | <b>0.00</b> | -           | -           | <b>0.00</b> | -           | -           | -           | -           |
| 118 | Nartheciaceae    | HERB | 0.01        | 0.12        | 0.20        | 0.22        | 0.30        | <b>0.39</b> | <b>0.00</b> | -           | -           | -           |
| 119 | Nerium           | HERB | 0.00        | -           | -           | -           | -           | -           | -           | -           | -           | -           |
| 120 | Nitrariaceae     | HERB | 0.00        | 0.13        | 0.25        | <b>0.00</b> | 0.50        | <b>0.00</b> | 0.50        | <b>1.00</b> | <b>0.33</b> | <b>0.00</b> |
| 121 | Olea             | HERB | 0.08        | 0.09        | 0.17        | 0.38        | 0.47        | 0.60        | 0.78        | 0.83        | 0.91        | 0.97        |
| 122 | Oleaceae undiff. | HERB | 0.02        | 0.10        | 0.18        | <b>0.56</b> | 0.35        | 0.66        | 0.79        | -           | -           | -           |
| 123 | Onagraceae       | HERB | 0.04        | 0.10        | 0.21        | -           | -           | -           | -           | -           | -           | -           |
| 124 | Orchidaceae      | TRSH | 0.00        | -           | -           | -           | -           | -           | -           | -           | -           | -           |
| 125 | Orobanchaceae    | HERB | 0.05        | 0.13        | 0.18        | 0.36        | 0.42        | 0.58        | 0.76        | 0.79        | 0.84        | -           |
| 126 | Ostrya.Carpinus  | HERB | 0.11        | 0.13        | 0.18        | 0.31        | 0.40        | 0.61        | 0.59        | 0.72        | 0.75        | 0.95        |
| 127 | Oxalidaceae      | TRSH | 0.01        | 0.11        | <b>0.08</b> | 0.40        | 0.59        | -           | -           | -           | -           | -           |
| 128 | Paeoniaceae      | HERB | 0.00        | -           | -           | -           | -           | -           | -           | -           | -           | -           |
| 129 | Papaveraceae     | HERB | 0.06        | -           | -           | -           | -           | -           | -           | -           | -           | -           |
| 130 | Parrotia         | TRSH | 0.00        | -           | -           | -           | -           | -           | -           | -           | -           | -           |
| 131 | Paulownia        | TRSH | 0.00        | -           | <b>0.00</b> | -           | <b>0.00</b> | -           | -           | -           | -           | -           |
| 132 | Phillyrea        | TRSH | 0.17        | 0.13        | -           | -           | -           | -           | -           | -           | -           | -           |
| 133 | Phoenix          | HERB | 0.00        | 0.00        | -           | <b>0.00</b> | -           | -           | -           | -           | -           | -           |
| 134 | Phyllanthaceae   | HERB | 0.00        | 0.00        | -           | -           | -           | -           | -           | -           | -           | -           |
| 135 | Picea            | TRSH | 0.13        | 0.23        | 0.26        | 0.24        | 0.38        | 0.59        | <b>0.31</b> | 0.70        | 0.95        | 0.95        |
| 136 | Pinaceae         | TRSH | 0.00        | -           | <b>0.00</b> | 0.50        | <b>0.90</b> | -           | <b>0.00</b> | -           | -           | -           |
| 137 | Pinus            | TRSH | <b>0.95</b> | <b>0.33</b> | <b>0.50</b> | <b>0.13</b> | 0.46        | 0.50        | 0.67        | <b>0.45</b> | 0.82        | 0.99        |
| 138 | Pistacia         | TRSH | 0.05        | 0.16        | 0.24        | 0.21        | 0.51        | <b>0.39</b> | 0.59        | <b>0.95</b> | 0.84        | -           |
| 139 | Plantaginaceae   | TRSH | <b>0.39</b> | 0.13        | 0.25        | 0.39        | 0.56        | 0.53        | 0.63        | 0.79        | 0.84        | 0.93        |
| 140 | Platanus         | DWAR | 0.02        | 0.14        | 0.24        | 0.40        | 0.55        | <b>0.79</b> | <b>0.86</b> | <b>1.00</b> | 0.93        | -           |
| 141 | Plumbaginaceae   | TRSH | 0.04        | -           | -           | -           | -           | -           | -           | -           | -           | -           |
| 142 | Poaceae          | TRSH | <b>0.92</b> | <b>0.67</b> | <b>0.80</b> | <b>0.71</b> | <b>0.73</b> | <b>0.96</b> | 0.74        | 0.88        | 0.91        | 0.99        |
| 143 | Polemoniaceae    | TRSH | 0.00        | 0.13        | 0.20        | <b>0.11</b> | -           | <b>0.00</b> | <b>0.00</b> | <b>1.00</b> | <b>0.50</b> | 1.00        |
| 144 | Polygalaceae     | TRSH | 0.00        | 0.00        | -           | -           | -           | -           | -           | -           | -           | -           |
| 145 | Polygonaceae     | TRSH | 0.12        | 0.17        | 0.21        | 0.35        | 0.45        | 0.50        | <b>0.86</b> | <b>1.00</b> | -           | -           |
| 146 | Populus          | HERB | 0.10        | 0.15        | -           | -           | -           | -           | -           | -           | -           | -           |

|     |                  |      |             |             |             |             |             |             |             |             |             |             |
|-----|------------------|------|-------------|-------------|-------------|-------------|-------------|-------------|-------------|-------------|-------------|-------------|
| 147 | Primulaceae      | UPHE | 0.03        | 0.14        | 0.19        | <b>0.20</b> | 0.35        | 0.50        | 0.58        | <b>0.14</b> | -           | -           |
| 148 | Prosopis         | HERB | 0.00        | 0.00        | <b>0.00</b> | -           | -           | -           | <b>0.00</b> | -           | <b>0.00</b> | -           |
| 149 | Prunus           | TRSH | 0.03        | 0.13        | 0.32        | 0.43        | <b>1.00</b> | -           | -           | -           | -           | -           |
| 150 | Pterocarya       | TRSH | 0.00        | 0.00        | <b>0.00</b> | -           | <b>0.00</b> | <b>0.00</b> | -           | -           | -           | -           |
| 151 | Punica           | TRSH | 0.00        | 0.00        | 0.40        | -           | -           | -           | <b>0.00</b> | <b>0.00</b> | -           | -           |
| 152 | Quercus          | HERB | <b>0.58</b> | 0.21        | <b>0.53</b> | <b>0.56</b> | 0.48        | 0.60        | 0.65        | 0.85        | 0.81        | 0.95        |
| 153 | Ranunculaceae    | LIAN | <b>0.38</b> | 0.11        | 0.18        | 0.34        | 0.43        | 0.55        | 0.70        | 0.76        | 0.84        | 0.96        |
| 154 | Resedaceae       | HERB | 0.00        | -           | -           | -           | -           | -           | -           | -           | -           | -           |
| 155 | Rhamnaceae       | HERB | 0.01        | 0.11        | <b>0.00</b> | 0.28        | -           | -           | -           | -           | -           | -           |
| 156 | Rhamnus          | TRSH | 0.04        | 0.05        | 0.14        | <b>0.14</b> | 0.31        | <b>0.00</b> | <b>0.14</b> | -           | -           | -           |
| 157 | Rhododendron     | TRSH | 0.02        | <b>0.33</b> | -           | -           | <b>0.64</b> | -           | -           | -           | -           | -           |
| 158 | Rhus             | DWAR | 0.01        | 0.08        | 0.23        | <b>0.00</b> | -           | -           | -           | -           | -           | -           |
| 159 | Robinia          | TRSH | 0.00        | -           | -           | -           | -           | -           | -           | -           | -           | -           |
| 160 | Rosaceae         | HERB | <b>0.63</b> | 0.04        | 0.22        | 0.22        | 0.39        | 0.58        | 0.63        | 0.75        | 0.88        | 0.96        |
| 161 | Rubiaceae        | TRSH | 0.16        | 0.12        | 0.17        | 0.36        | 0.39        | 0.56        | 0.77        | 0.78        | 0.83        | -           |
| 162 | Rumex            | HERB | <b>0.36</b> | 0.10        | 0.10        | 0.34        | 0.53        | 0.53        | 0.63        | 0.76        | 0.84        | 0.96        |
| 163 | Rutaceae         | HERB | 0.00        | -           | -           | -           | <b>0.00</b> | -           | -           | -           | -           | -           |
| 164 | Salix            | TRSH | <b>0.37</b> | 0.09        | 0.15        | 0.42        | 0.37        | 0.54        | 0.61        | 0.76        | 0.85        | 0.93        |
| 165 | Sambucus         | TRSH | 0.03        | 0.15        | 0.23        | 0.40        | 0.44        | 0.61        | <b>1.00</b> | -           | -           | -           |
| 166 | Santalaceae      | SUCC | 0.03        | 0.00        | -           | -           | -           | -           | -           | -           | -           | -           |
| 167 | Sapotaceae       | TRSH | <b>1.00</b> | -           | -           | -           | -           | -           | -           | -           | -           | -           |
| 168 | Saxifragaceae    | TRSH | 0.07        | <b>0.51</b> | -           | -           | -           | -           | -           | -           | -           | -           |
| 169 | Scrophulariaceae | PALM | 0.09        | 0.20        | -           | -           | -           | -           | -           | -           | -           | -           |
| 170 | Smilacaceae      | HERB | 0.00        | 0.00        | -           | -           | -           | -           | -           | -           | -           | -           |
| 171 | Solanaceae       | TRSH | 0.04        | -           | -           | -           | -           | -           | -           | -           | -           | -           |
| 172 | Sorbus           | HERB | 0.02        | 0.15        | 0.18        | 0.36        | 0.59        | 0.50        | 0.53        | 0.63        | 0.75        | -           |
| 173 | Styrax           | HERB | 0.00        | <b>0.50</b> | <b>0.00</b> | <b>0.00</b> | -           | -           | -           | <b>0.17</b> | -           | <b>0.15</b> |
| 174 | Syringa          | TRSH | 0.00        | 0.00        | <b>0.00</b> | 0.50        | -           | <b>0.00</b> | <b>1.00</b> | -           | -           | -           |
| 175 | Tamaricaceae     | HERB | 0.00        | 0.00        | <b>0.00</b> | -           | -           | -           | -           | -           | -           | -           |
| 176 | Tamarix          | HERB | 0.01        | 0.07        | <b>0.42</b> | 0.50        | <b>0.69</b> | <b>0.25</b> | -           | -           | -           | -           |
| 177 | Taxus            | HERB | 0.03        | -           | -           | -           | -           | -           | -           | -           | -           | -           |
| 178 | Thalictrum       | TRSH | 0.06        | 0.12        | 0.22        | 0.39        | 0.36        | 0.55        | 0.75        | -           | -           | -           |
| 179 | Thymelaeaceae    | HERB | 0.05        | -           | -           | -           | -           | -           | -           | -           | -           | -           |
| 180 | Tilia            | HERB | 0.06        | 0.16        | 0.24        | 0.41        | 0.46        | 0.56        | 0.55        | 0.68        | 0.87        | 1.00        |
| 181 | Tofieldiaceae    | HERB | 0.00        | -           | -           | -           | -           | -           | -           | -           | -           | -           |
| 182 | Trachycarpus     | HERB | 0.00        | -           | -           | <b>0.00</b> | -           | -           | -           | -           | -           | -           |
| 183 | Tsuga            | TRSH | 0.00        | 0.00        | <b>0.00</b> | <b>0.00</b> | <b>0.00</b> | -           | -           | -           | -           | -           |
| 184 | Ulmus            | TRSH | 0.13        | 0.15        | 0.17        | 0.32        | 0.47        | 0.52        | 0.67        | 0.78        | 0.83        | 1.00        |
| 185 | Urticaceae       | HERB | 0.13        | 0.08        | 0.19        | 0.36        | 0.45        | 0.64        | 0.73        | 0.85        | 0.93        | 1.00        |
| 186 | Valerianaceae    | HERB | 0.01        | 0.13        | <b>0.50</b> | <b>0.00</b> | <b>0.00</b> | <b>0.00</b> | <b>0.00</b> | -           | -           | -           |
| 187 | Verbenaceae      | TRSH | 0.00        | <b>1.00</b> | -           | -           | -           | -           | -           | -           | -           | -           |
| 188 | Viburnum         | TRSH | 0.03        | 0.15        | <b>0.10</b> | 0.22        | <b>0.25</b> | <b>0.10</b> | <b>0.00</b> | -           | -           | -           |
| 189 | Vinca            | TRSH | 0.00        | 0.00        | <b>0.00</b> | -           | -           | -           | -           | -           | -           | -           |
| 190 | Violaceae        | TRSH | 0.03        | -           | -           | -           | -           | -           | -           | -           | -           | -           |
| 191 | Vitaceae         | TRSH | 0.10        | -           | -           | -           | -           | -           | -           | -           | -           | -           |
| 192 | Vitex            | TRSH | 0.00        | 0.00        | -           | -           | -           | -           | -           | -           | <b>0.00</b> | -           |
| 193 | Ziziphus         | HERB | 0.00        | 0.00        | <b>0.00</b> | -           | -           | -           | -           | -           | -           | -           |
| 194 | Zygophyllaceae   | HERB | 0.00        | 0.21        | <b>0.00</b> | <b>0.00</b> | <b>0.00</b> | <b>1.00</b> | -           | -           | -           | -           |

**Bold probability values** = occurrence probability outside the predicted probability range for more than 0.1

" - " = no predictions corresponding to the class.

**Group ID names :**

TRSH = Trees & Shrubs

UPHE = Upland herbs

HERB = Herbs

DWAR = Dwarf shrubs

LIAN = Liana
